# Supplementary material for: A critical role for IFN-β signaling for IFN-κ induction in keratinocytes
Source: Frontiers journal article supplement (doi:10.3389/flupu.2024.1359714), 2024-03-19
Supplement: Table_5.XLSX [file Table_5.XLSX]

## Sheet: Sheet1
ID	Label	Symbol	IFNK_count	IFNB1_count	Pvalue	Consensus	Consensus_IUPAC
motif186	MTHFD1|GCYGGG	MTHFD1	9	0	0.0014	5-GCTGGG/CCCAGC-3	5-GCYGGG/CCCRGC-3
motif502	JUN_FOS|TGACTCA|MA0099.2	FOS|JUN	6	0	0.0123	5-TGACTCA/TGAGTCA-3	5-TGACTCA/TGAGTCA-3
motif112	HDAC8|ATTWMT	HDAC8	15	34	0.015	5-ATTAAT/ATTAAT-3	5-ATTWMT/AKWAAT-3
motif20	BRUNOL6|TGACM	CELF6	30	15	0.016	5-TGACC/GGTCA-3	5-TGACM/KGTCA-3
motif910	BSX|TAATBR	BSX	21	9	0.0174	5-TAATTG/CAATTA-3	5-TAATBR/YVATTA-3
motif1339	Nfe2l1|ATGAC|M03394	NFE2L1	19	8	0.0213	5-ATGAC/GTCAT-3	5-ATGAC/GTCAT-3
motif979	RHOXF1_4|TRATCC	RHOXF1	18	7	0.0255	5-TAATCC/GGATTA-3	5-TRATCC/GGATYA-3
motif10	ARFGAP1|CATGKMS	ARFGAP1	9	2	0.0326	5-CATGGAC/GGCCATG-3	5-CATGKMS/SKMCATG-3
motif1356	Foxr1|TGTTTG|M04647	FOXR1	9	2	0.0326	5-TGTTTG/CAAACA-3	5-TGTTTG/CAAACA-3
motif288	RXRA|TGACCY	RXRA	7	1	0.0327	5-TGACCC/GGGTCA-3	5-TGACCY/RGGTCA-3
motif371	WHSC2|AWTTGGA	NELFA	14	5	0.0362	5-ATTTGGA/TCCAAAT-3	5-AWTTGGA/TCCAAWT-3
motif977	RHOXF1_2|TRAKCC	RHOXF1	17	7	0.0386	5-TAATCC/GGATTA-3	5-TRAKCC/GGMTYA-3
motif129	HOXB9|TAATTG	HOXB9	12	4	0.0428	5-TAATTG/CAATTA-3	5-TAATTG/CAATTA-3
motif213	NXPH3|WGSKKGG	NXPH3	21	11	0.0519	5-AGCGGGG/CCAAGCT-3	5-WGSKKGG/CCMMSCW-3
motif83	FAM127B|GTTSCCM	FAM127B	4	0	0.0533	5-GTTGCCA/TGGCAAC-3	5-GTTSCCM/KGGSAAC-3
motif362	UQCRB|AYGACG	UQCRB	4	0	0.0533	5-ATGACG/CGTCAT-3	5-AYGACG/CGTCRT-3
motif600	Zfp128_2|TATAWNTATAN|PB0198	ZNF8	4	0	0.0533	5-TATATATATAC/GTATATATATA-3	5-TATAWNTATAN/NTATANWTATA-3
motif981	VENTX|YTAATNG	VENTX	4	0	0.0533	5-CTAATCG/CGATTAG-3	5-YTAATNG/CNATTAR-3
motif1089	HDAC2_disc1|CTTATCTN	HDAC2	4	0	0.0533	5-CTTATCTG/CAGATAAG-3	5-CTTATCTN/NAGATAAG-3
motif1170	HMGN3_disc2|CTTATCTS	HMGN3	4	0	0.0533	5-CTTATCTG/CAGATAAG-3	5-CTTATCTS/SAGATAAG-3
motif1346	NANOG|TAATTRS|M03408	NANOG	4	0	0.0533	5-TAATTGC/GCAATTA-3	5-TAATTRS/SYAATTA-3
motif2745	Rxra|TGACCCC|UP00053	RXRA	4	0	0.0533	5-TGACCCC/GGGGTCA-3	5-TGACCCC/GGGGTCA-3
motif91	FOXM1|TTTGCA	FOXM1	10	23	0.0537	5-TTTGCA/TGCAAA-3	5-TTTGCA/TGCAAA-3
motif254	RAB18|TTTCCM	RAB18	10	23	0.0537	5-TTTCCC/GGGAAA-3	5-TTTCCM/KGGAAA-3
motif916	EVX2|TAATNA	EVX2	18	9	0.0561	5-TAATTA/TAATTA-3	5-TAATNA/TNATTA-3
motif164	MAGED4|TTTCCA	MAGED4	6	16	0.0564	5-TTTCCA/TGGAAA-3	5-TTTCCA/TGGAAA-3
motif1442	GATA-5|KTAMCAR|M05445	GATA5	8	2	0.0569	5-TTAACAG/CTGTTAA-3	5-KTAMCAR/YTGKTAM-3
motif341	TIMELESS|TCGTC	TIMELESS	6	1	0.0609	5-TCGTC/GACGA-3	5-TCGTC/GACGA-3
motif991	NR2F1_3|TGACCYC	NR2F1	6	1	0.0609	5-TGACCCC/GGGGTCA-3	5-TGACCYC/GRGGTCA-3
motif239	PPP1R10|ATGAARC	PPP1R10	0	5	0.0634	5-ATGAAGC/GCTTCAT-3	5-ATGAARC/GYTTCAT-3
motif933	HOXD11_2|TTTTATKR	HOXD11	0	5	0.0634	5-TTTTATTA/TAATAAAA-3	5-TTTTATKR/YMATAAAA-3
motif1379	sox30|YAAATTTTC|M05317	SOX30	0	5	0.0634	5-TAAATTTTC/GAAAATTTA-3	5-YAAATTTTC/GAAAATTTR-3
motif295	SFT2D1|WYTTSMA	SFT2D1	14	28	0.0636	5-ATTTCCA/TGCAAAT-3	5-WYTTSMA/TKSAARW-3
motif155	LHX2|TAATKR	LHX2	14	6	0.0709	5-TAATGG/CAATTA-3	5-TAATKR/YMATTA-3
motif918	GSX1|TAATNR	GSX1	14	6	0.0709	5-TAATTA/TAATTA-3	5-TAATNR/YNATTA-3
motif974	PDX1_2|TAATKR	PDX1	14	6	0.0709	5-TAATTA/TAATTA-3	5-TAATKR/YMATTA-3
motif130	HOXD3|AAATTWC	HOXD3	1	7	0.072	5-AAATTAC/GTAATTT-3	5-AAATTWC/GWAATTT-3
motif260	RARG|CTTCYG	RARG	1	7	0.072	5-CTTCCG/CGGAAG-3	5-CTTCYG/CRGAAG-3
motif59	DIS3|TTTCC	DIS3	50	76	0.0728	5-TTTCC/GGAAA-3	5-TTTCC/GGAAA-3
motif79	EVX1|TTTSCA	EVX1	10	22	0.0752	5-TTTCCA/TGGAAA-3	5-TTTSCA/TGSAAA-3
motif359	UBB|TCCCN	UBB	21	12	0.082	5-TCCCA/TGGGA-3	5-TCCCN/NGGGA-3
motif1515	Zfp536|CMTCCG|M05541	ZNF536	9	3	0.0823	5-CCTCCG/CGGAGG-3	5-CMTCCG/CGGAKG-3
motif64	DUS3L|AKCCA	DUS3L	39	27	0.0836	5-AGCCA/TGGCT-3	5-AKCCA/TGGMT-3
motif344	TMSL3|GRCG	TMSB4XP8	15	7	0.0854	5-GACG/CGTC-3	5-GRCG/CGYC-3
motif278	RIOK2|ATTTM	RIOK2	36	56	0.0943	5-ATTTC/GAAAT-3	5-ATTTM/KAAAT-3
motif712	HIC2|RTGCCCN	HIC2	7	2	0.0977	5-ATGCCCA/TGGGCAT-3	5-RTGCCCN/NGGGCAY-3
motif313	SPATS2|MTTTC	SPATS2	32	51	0.098	5-CTTTC/GAAAG-3	5-MTTTC/GAAAK-3
motif175	MGC10334|GRAGC	GLTPD1	7	16	0.0988	5-GGAGC/GCTCC-3	5-GRAGC/GCTYC-3
motif46	CSTF2|AAATAAA	CSTF2	5	13	0.1007	5-AAATAAA/TTTATTT-3	5-AAATAAA/TTTATTT-3
motif92	FOXP4|MTTTYCC	FOXP4	13	25	0.104	5-CTTTTCC/GGAAAAG-3	5-MTTTYCC/GGRAAAK-3
motif153	LAS1L|TTTCMA	LAS1L	13	25	0.104	5-TTTCCA/TGGAAA-3	5-TTTCMA/TKGAAA-3
motif330	TFAM|YTTCMA	TFAM	13	25	0.104	5-TTTCCA/TGGAAA-3	5-YTTCMA/TKGAAR-3
motif80	EWSR1|WAMYGAGC	EWSR1	3	0	0.1109	5-TAATGAGC/GCTCATTA-3	5-WAMYGAGC/GCTCRKTW-3
motif221	PCK2|ACSMCG	PCK2	3	0	0.1109	5-ACGCCG/CGGCGT-3	5-ACSMCG/CGKSGT-3
motif255	RAB2A|AKCGTC	RAB2A	3	0	0.1109	5-ATCGTC/GACGAT-3	5-AKCGTC/GACGMT-3
motif343	TIMM8A|GVBCACG	TIMM8A	3	0	0.1109	5-GGGCACG/CGTGCCC-3	5-GVBCACG/CGTGVBC-3
motif466	JUN_FOS|TKASTCAC|MA0099	FOS|JUN	3	0	0.1109	5-TGACTCAC/GTGAGTCA-3	5-TKASTCAC/GTGASTMA-3
motif494	FOXO3|TGTTTACM|MA0157	FOXO3	3	0	0.1109	5-TGTTTACA/TGTAAACA-3	5-TGTTTACM/KGTAAACA-3
motif499	Nr2e3|AAGCTTN|MA0164	NR2E3	3	0	0.1109	5-AAGCTTG/CAAGCTT-3	5-AAGCTTN/NAAGCTT-3
motif524	Esrra_2|TGACCCCT|PB0118	ESRRA	3	0	0.1109	5-TGACCCCT/AGGGGTCA-3	5-TGACCCCT/AGGGGTCA-3
motif1065	STAT_disc2|TGANTCA	STAT3	3	0	0.1109	5-TGAGTCA/TGACTCA-3	5-TGANTCA/TGANTCA-3
motif1070	EP300_disc1|TGANTCAB	EP300	3	0	0.1109	5-TGAGTCAT/ATGACTCA-3	5-TGANTCAB/VTGANTCA-3
motif1111	HMGN3_disc1|TGASTCABS	HMGN3	3	0	0.1109	5-TGAGTCAGC/GCTGACTCA-3	5-TGASTCABS/SVTGASTCA-3
motif1209	SIN3A_disc5|SVSCNNCNSS	SIN3A	3	0	0.1109	5-CAGCACCAGC/GCTGGTGCTG-3	5-SVSCNNCNSS/SSNGNNGSBS-3
motif1297	Fra-2|TGACTCA|M03310	FOSL2	3	0	0.1109	5-TGACTCA/TGAGTCA-3	5-TGACTCA/TGAGTCA-3
motif2883	Six1|TGATACCCY|UP00192	SIX1	3	0	0.1109	5-TGATACCCC/GGGGTATCA-3	5-TGATACCCY/RGGGTATCA-3
motif187	MXD4|AWMCCRG	MXD4	5	1	0.1118	5-AAACCAG/CCGGTTT-3	5-AWMCCRG/CYGGKWT-3
motif484	Gata1|AGATAAG|MA0035.2	GATA1	5	1	0.1118	5-AGATAAG/CTTATCT-3	5-AGATAAG/CTTATCT-3
motif509	Zfp105_1|TTKTTNTTTR|PB0093	ZNF35	5	1	0.1118	5-TTGTTGTTTG/CAAACAACAA-3	5-TTKTTNTTTR/YAAANAAMAA-3
motif2774	Zfp105|TTKTTDTTTR|UP00037	ZNF35	5	1	0.1118	5-TTGTTGTTTG/CAAACAACAA-3	5-TTKTTDTTTR/YAAAHAAMAA-3
motif2909	GFI1|AATCWCWG	HDAC2	5	1	0.1118	5-AATCACAG/CTGTGATT-3	5-AATCWCWG/CWGWGATT-3
motif30	CCDC16|TTCATYT	ZNF830	2	8	0.112	5-TTCATTT/AAATGAA-3	5-TTCATYT/ARATGAA-3
motif281	RNF138|WTGAA	RNF138	22	37	0.1168	5-ATGAA/TTCAT-3	5-WTGAA/TTCAW-3
motif380	ZBTB25|SAAAGG	ZBTB25	6	14	0.1208	5-CAAAGG/CCTTTG-3	5-SAAAGG/CCTTTS-3
motif244	PRKRIR|AAARGYMA	PRKRIR	4	11	0.1226	5-AAAGGCCA/TGGCCTTT-3	5-AAARGYMA/TKRCYTTT-3
motif107	H1FX|TTTCNMG	H1FX	0	4	0.1261	5-TTTCCAG/CTGGAAA-3	5-TTTCNMG/CKNGAAA-3
motif535	Glis2_2|TTTAWTAATA|PB0129	GLIS2	0	4	0.1261	5-TTTATTAATA/TATTAATAAA-3	5-TTTAWTAATA/TATTAWTAAA-3
motif564	Rfx4_2|TRGWTAC|PB0159	RFX4	1	6	0.127	5-TAGTTAC/GTAACTA-3	5-TRGWTAC/GTAWCYA-3
motif356	TSNAX|RGAAATG	TSNAX	12	23	0.1271	5-AGAAATG/CATTTCT-3	5-RGAAATG/CATTTCY-3
motif928	HOXB5|TAATTR	HOXB5	17	10	0.1277	5-TAATTA/TAATTA-3	5-TAATTR/YAATTA-3
motif300	SMAP1L|GGCTGG	SMAP2	11	5	0.1323	5-GGCTGG/CCAGCC-3	5-GGCTGG/CCAGCC-3
motif407	ZNF326|RTTTKGC	ZNF326	11	5	0.1323	5-GTTTGGC/GCAAAAC-3	5-RTTTKGC/GCMAAAY-3
motif296	SLC18A1|AATTGST	SLC18A1	8	3	0.1333	5-AATTGGT/ACCAATT-3	5-AATTGST/ASCAATT-3
motif585	Srf_2|NTTTTTTTN|PB0182	SRF	8	3	0.1333	5-TTTTTTTTT/AAAAAAAAA-3	5-NTTTTTTTN/NAAAAAAAN-3
motif591	Tcfap2a_2|RCCYNWGG|PB0189	TFAP2A	8	3	0.1333	5-ACCTCTGG/CCAGAGGT-3	5-RCCYNWGG/CCWNRGGY-3
motif909	BARX1_2|TAATBG	BARX1	8	3	0.1333	5-TAATTG/CAATTA-3	5-TAATBG/CVATTA-3
motif1338	GKLF|WRRRGRAAGG|M03392	KLF4	8	3	0.1333	5-AAAAGGAAGG/CCTTCCTTTT-3	5-WRRRGRAAGG/CCTTYCYYYW-3
motif702	THAP1|YTGCCC|MA0597	THAP1	5	12	0.1486	5-CTGCCC/GGGCAG-3	5-YTGCCC/GGGCAR-3
motif198	NFIL3|AWTGMA	NFIL3	11	21	0.1559	5-ATTGAA/TTCAAT-3	5-AWTGMA/TKCAWT-3
motif232	PKM2|AWTTATC	PKM	8	17	0.1595	5-AATTATC/GATAATT-3	5-AWTTATC/GATAAWT-3
motif351	TRIP10|ATTKRCW	TRIP10	8	17	0.1595	5-ATTTACA/TGTAAAT-3	5-ATTKRCW/WGYMAAT-3
motif252	R3HDM2|AWTTTA	R3HDM2	15	26	0.1602	5-AATTTA/TAAATT-3	5-AWTTTA/TAAAWT-3
motif122	HMG20A|MATTG	HMG20A	25	17	0.1638	5-CATTG/CAATG-3	5-MATTG/CAATK-3
motif212	NUP133|TGAMCT	NUP133	6	2	0.1649	5-TGACCT/AGGTCA-3	5-TGAMCT/AGKTCA-3
motif955	Lhx8_2|TAATTAN	LHX8	6	2	0.1649	5-TAATTAG/CTAATTA-3	5-TAATTAN/NTAATTA-3
motif1290	DBP|DTTTGCT|M03298	DBP	6	2	0.1649	5-GTTTGCT/AGCAAAC-3	5-DTTTGCT/AGCAAAH-3
motif357	TULP1|RTTTBCC	TULP1	6	13	0.1731	5-ATTTCCC/GGGAAAT-3	5-RTTTBCC/GGVAAAY-3
motif89	FLJ37078|TTTGAAA	SRRM3	9	18	0.1761	5-TTTGAAA/TTTCAAA-3	5-TTTGAAA/TTTCAAA-3
motif397	ZNF193|TTKCA	ZSCAN9	38	55	0.1768	5-TTGCA/TGCAA-3	5-TTKCA/TGMAA-3
motif292	SEMA4A|MTKGC	SEMA4A	44	35	0.1775	5-ATTGC/GCAAT-3	5-MTKGC/GCMAK-3
motif53	DDX4|ATTTC	DDX4	45	64	0.1778	5-ATTTC/GAAAT-3	5-ATTTC/GAAAT-3
motif247	PSMA6|TTTCYMW	PSMA6	13	23	0.1819	5-TTTCCAA/ATGGAAA-3	5-TTTCYMW/WKRGAAA-3
motif163	MAGEA8|TTYCCAG	MAGEA8	2	7	0.1826	5-TTTCCAG/CTGGAAA-3	5-TTYCCAG/CTGGRAA-3
motif589	Tcf7_2|TATTANAAA|PB0187	TCF7	2	7	0.1826	5-TATTATAAA/TTTATAATA-3	5-TATTANAAA/TTTNTAATA-3
motif870	TCF4_2|NAGGTG	TCF4	2	7	0.1826	5-CAGGTG/CACCTG-3	5-NAGGTG/CACCTN-3
motif1253	STAT_disc7|BCCYYNCCC	STAT3	2	7	0.1826	5-TCCTTTCCC/GGGAAAGGA-3	5-BCCYYNCCC/GGGNRRGGV-3
motif1	ABCF2|RMTTTC	ABCF2	17	11	0.1905	5-GCTTTC/GAAAGC-3	5-RMTTTC/GAAAKY-3
motif35	CENTG1|TTTSCAK	AGAP2	7	14	0.1962	5-TTTGCAT/ATGCAAA-3	5-TTTSCAK/MTGSAAA-3
motif5	AFF4|GSWGGG	AFF4	10	5	0.197	5-GCAGGG/CCCTCC-3	5-GSWGGG/CCCWSC-3
motif238	POU3F2|CHAAWTG	POU3F2	14	8	0.1993	5-CAAATTG/CAATTAG-3	5-CHAAWTG/CAWTTDG-3
motif497	NFIC|TTGGC|MA0161	NFIC	23	16	0.1999	5-TTGGC/GCCAA-3	5-TTGGC/GCCAA-3
motif43	CREB1|TGACST	CREB1	4	1	0.2018	5-TGACGT/ACGTCA-3	5-TGACST/ASGTCA-3
motif229	PIK3C3|GAGYCC	PIK3C3	4	1	0.2018	5-GAGCCC/GGGCTC-3	5-GAGYCC/GGRCTC-3
motif1388	TR2|NTGACCT|M05347	NR2C1	4	1	0.2018	5-TTGACCT/AGGTCAA-3	5-NTGACCT/AGGTCAN-3
motif1108	RAD21_disc5|KGGS	RAD21	85	75	0.2038	5-GGGC/GCCC-3	5-KGGS/SCCM-3
motif250	PTPMT1|TCCCC	PTPMT1	36	28	0.2105	5-TCCCC/GGGGA-3	5-TCCCC/GGGGA-3
motif385	ZCCHC14|SCTCCS	ZCCHC14	7	3	0.2114	5-GCTCCC/GGGAGC-3	5-SCTCCS/SGGAGS-3
motif443	MZF1_1_4|TCCCC|MA0056	MZF1	7	3	0.2114	5-TCCCC/GGGGA-3	5-TCCCC/GGGGA-3
motif1298	ipf1|TAATGAN|M03313	PDX1	7	3	0.2114	5-TAATGAC/GTCATTA-3	5-TAATGAN/NTCATTA-3
motif1325	Sox17|CATTGTB|M03370	SOX17	7	3	0.2114	5-CATTGTC/GACAATG-3	5-CATTGTB/VACAATG-3
motif386	ZCCHC17|TGRCAG	ZCCHC17	5	11	0.2156	5-TGACAG/CTGCCA-3	5-TGRCAG/CTGYCA-3
motif273	RFC2|WAATKR	RFC2	44	36	0.2192	5-AAATGA/CCATTT-3	5-WAATKR/YMATTW-3
motif173	MEF2B|AATRAADTK	MEF2B	1	5	0.2208	5-AATGAAATT/AATTTCATT-3	5-AATRAADTK/MAHTTYATT-3
motif311	SOX14|TTTCVGTT	SOX14	1	5	0.2208	5-TTTCAGTT/AACTGAAA-3	5-TTTCVGTT/AACBGAAA-3
motif168	MAPK1|SAAAS	MAPK1	48	66	0.2216	5-CAAAG/CTTTG-3	5-SAAAS/STTTS-3
motif430	En1|ACHAC|MA0027	EN1	27	40	0.2217	5-ACTAC/GTAGT-3	5-ACHAC/GTDGT-3
motif938	Hoxd3|TAATTR	HOXD3	11	6	0.225	5-TAATTA/TAATTA-3	5-TAATTR/YAATTA-3
motif36	CFL2|AMMCCG	CFL2	2	0	0.2308	5-ACCCCG/CGGGGT-3	5-AMMCCG/CGGKKT-3
motif111	HCLS1|GMCVTGRC	HCLS1	2	0	0.2308	5-GACGTGGC/GCCACGTC-3	5-GMCVTGRC/GYCABGKC-3
motif294	SF3B1|RTCTGKC	SF3B1	2	0	0.2308	5-ATCTGGC/GACAGAT-3	5-RTCTGKC/GMCAGAY-3
motif312	SPAG7|KWCSTSRYC	SPAG7	2	0	0.2308	5-GACGTGGCC/GGCCACGTC-3	5-KWCSTSRYC/GRYSASGWM-3
motif315	SRP9|AARSTGGM	SRP9	2	0	0.2308	5-AAGGTGGC/GCCACCTT-3	5-AARSTGGM/KCCASYTT-3
motif368	VIL2|CYTCCG	EZR	2	0	0.2308	5-CCTCCG/CGGAGG-3	5-CYTCCG/CGGARG-3
motif450	RORA_1|AWNNAGGTCA|MA0071	RORA	2	0	0.2308	5-ATCAAGGTCA/TGACCTTGAT-3	5-AWNNAGGTCA/TGACCTNNWT-3
motif526	Foxj1_2|TGTTRTNN|PB0120	FOXJ1	2	0	0.2308	5-TGTTGTGA/TCACAACA-3	5-TGTTRTNN/NNAYAACA-3
motif549	Lef1_2|ATCAATCA|PB0144	LEF1	2	0	0.2308	5-ATCAATCA/TGATTGAT-3	5-ATCAATCA/TGATTGAT-3
motif588	Tcf3_2|NNNWNNNNNSS|PB0186	TCF3	2	0	0.2308	5-TTTTTTTTCGG/CCGAAAAAAAA-3	5-NNNWNNNNNSS/SSNNNNNWNNN-3
motif623	Irx4|WACATGTWA|PH0085	IRX4	2	0	0.2308	5-TACATGTAA/TTACATGTA-3	5-WACATGTWA/TWACATGTW-3
motif652	Gfi1b|AAATCWCWGC|MA0483	GFI1B	2	0	0.2308	5-AAATCACAGC/GCTGTGATTT-3	5-AAATCWCWGC/GCWGWGATTT-3
motif717	Hic1_2|RTGCCAAC	HIC1	2	0	0.2308	5-ATGCCAAC/GTTGGCAT-3	5-RTGCCAAC/GTTGGCAY-3
motif925	HOXA10|TTTTAYGAC	HOXA10	2	0	0.2308	5-TTTTACGAC/GTCGTAAAA-3	5-TTTTAYGAC/GTCRTAAAA-3
motif1054	BATF_disc1|DNTGASTCA	BATF	2	0	0.2308	5-AATGAGTCA/TGACTCATT-3	5-DNTGASTCA/TGASTCANH-3
motif1078	MYC_disc3|TGASTCA	MAX	2	0	0.2308	5-TGAGTCA/TGACTCA-3	5-TGASTCA/TGASTCA-3
motif1085	IRF_disc2|WATGASTCA	IRF4	2	0	0.2308	5-TATGAGTCA/TGACTCATA-3	5-WATGASTCA/TGASTCATW-3
motif1093	TRIM28_disc1|TGASTCABH	TRIM28	2	0	0.2308	5-TGAGTCATC/GATGACTCA-3	5-TGASTCABH/DVTGASTCA-3
motif1122	NFKB_disc3|AAATCCCCT	RELA|RELB|REL|NFKB1|NFKB2	2	0	0.2308	5-AAATCCCCT/AGGGGATTT-3	5-AAATCCCCT/AGGGGATTT-3
motif1236	ZNF143_disc4|SSNSSBCBSSS	ZNF143	2	0	0.2308	5-CCAGCGCCCGC/GCGGGCGCTGG-3	5-SSNSSBCBSSS/SSSVGVSSNSS-3
motif1240	CHD2_disc3|BCNCSCSNS	CHD2	2	0	0.2308	5-CCTCGCCCC/GGGGCGAGG-3	5-BCNCSCSNS/SNSGSGNGV-3
motif1245	BCL_disc10|SCBCNGSBSS	BCLAF1	2	0	0.2308	5-CCTCCGCCCC/GGGGCGGAGG-3	5-SCBCNGSBSS/SSVSCNGVGS-3
motif1246	ETS_disc9|CBBCCSSC	GABPA	2	0	0.2308	5-CCGCCCCC/GGGGGCGG-3	5-CBBCCSSC/GSSGGVVG-3
motif1250	STAT_disc6|TTCCTSCCT	STAT3	2	0	0.2308	5-TTCCTGCCT/AGGCAGGAA-3	5-TTCCTSCCT/AGGSAGGAA-3
motif1285	Pax-2|ACGTGAC|M03282	PAX2	2	0	0.2308	5-ACGTGAC/GTCACGT-3	5-ACGTGAC/GTCACGT-3
motif1345	FOXP1|TTWTTTNTKTTTTTTTTTTT|M03402	FOXP1	2	0	0.2308	5-TTATTTTTTTTTTTTTTTTT/AAAAAAAAAAAAAAAAATAA-3	5-TTWTTTNTKTTTTTTTTTTT/AAAAAAAAAAAMANAAAWAA-3
motif1478	NKX1-2|WTAATAAGGA|M05492	NKX1-2	2	0	0.2308	5-ATAATAAGGA/TCCTTATTAT-3	5-WTAATAAGGA/TCCTTATTAW-3
motif1957	ZNF99|TCTCACMCCN|M06080	ZNF99	2	0	0.2308	5-TCTCACCCCA/TGGGGTGAGA-3	5-TCTCACMCCN/NGGKGTGAGA-3
motif2772	Zbtb3|TGCAGTG|UP00031	ZBTB3	2	0	0.2308	5-TGCAGTG/CACTGCA-3	5-TGCAGTG/CACTGCA-3
motif2839	Irx4|NWTWACATGTW|UP00194	IRX4	2	0	0.2308	5-TTTTACATGTA/TACATGTAAAA-3	5-NWTWACATGTW/WACATGTWAWN-3
motif2840	Irx5|WACATGTW|UP00250	IRX5	2	0	0.2308	5-TACATGTA/TACATGTA-3	5-WACATGTW/WACATGTW-3
motif2841	Irx6|TACATGTA|UP00150	IRX6	2	0	0.2308	5-TACATGTA/TACATGTA-3	5-TACATGTA/TACATGTA-3
motif353	TROVE2|MTTTSY	TROVE2	35	50	0.2312	5-ATTTGC/ACAAAT-3	5-MTTTSY/RSAAAK-3
motif39	CLK1|TGAAAK	CLK1	13	22	0.2365	5-TGAAAG/CTTTCA-3	5-TGAAAK/MTTTCA-3
motif190	MYLK|TTTCCA	MYLK	9	17	0.238	5-TTTCCA/TGGAAA-3	5-TTTCCA/TGGAAA-3
motif21	C19orf25|MAAAGT	C19orf25	27	20	0.2419	5-AAAAGT/ACTTTT-3	5-MAAAGT/ACTTTK-3
motif196	NFATC3|TTTCCA	NFATC3	6	12	0.2442	5-TTTCCA/TGGAAA-3	5-TTTCCA/TGGAAA-3
motif364	USP39|TTTCMRA	USP39	6	12	0.2442	5-TTTCCAA/TTGGAAA-3	5-TTTCMRA/TYKGAAA-3
motif86	FHL2|TSCCYAGY	FHL2	0	3	0.2511	5-TCCCCAGC/GCTGGGGA-3	5-TSCCYAGY/RCTRGGSA-3
motif98	GPD1|GNGNNGGG	GPD1	0	3	0.2511	5-GGGGAGGG/CCCTCCCC-3	5-GNGNNGGG/CCCNNCNC-3
motif109	H2AFZ|TTYCCCADKG	H2AFZ	0	3	0.2511	5-TTTCCCAATG/CAATGGGAAA-3	5-TTYCCCADKG/CMHTGGGRAA-3
motif276	RFX4|AAATGAA	RFX4	0	3	0.2511	5-AAATGAA/TTCATTT-3	5-AAATGAA/TTCATTT-3
motif305	SND1|RGTTTSGG	SND1	0	3	0.2511	5-GGTTTGGG/CCCAAACC-3	5-RGTTTSGG/CCSAAACY-3
motif672	Atoh1|CAGMTGGY|MA0461	ATOH1	0	3	0.2511	5-CAGATGGC/GCCATCTG-3	5-CAGMTGGY/RCCAKCTG-3
motif889	FOXB1_4|TRTTTACA	FOXB1	0	3	0.2511	5-TGTTTACA/TGTAAACA-3	5-TRTTTACA/TGTAAAYA-3
motif1077	EP300_disc2|ATTGCANMAB	EP300	0	3	0.2511	5-ATTGCATCAT/ATGATGCAAT-3	5-ATTGCANMAB/VTKNTGCAAT-3
motif1521	PLAGL2|AAGGWCC|M05548	PLAGL2	0	3	0.2511	5-AAGGACC/GGTCCTT-3	5-AAGGWCC/GGWCCTT-3
motif1569	SALL3|VTTTTGRAY|M05609	SALL3	0	3	0.2511	5-CTTTTGGAC/GTCCAAAAG-3	5-VTTTTGRAY/RTYCAAAAB-3
motif2893	Ehf|AYTTCCGG|UP00403	EHF	0	3	0.2511	5-ACTTCCGG/CCGGAAGT-3	5-AYTTCCGG/CCGGAART-3
motif159	LRRFIP1|TTACTSAW	LRRFIP1	8	4	0.2519	5-TTACTCAA/TTCAGTAA-3	5-TTACTSAW/WTSAGTAA-3
motif256	RAB7A|CYGAGC	RAB7A	8	4	0.2519	5-CTGAGC/GCTCAG-3	5-CYGAGC/GCTCRG-3
motif13	AVEN|TTYCCA	AVEN	10	18	0.2558	5-TTTCCA/TGGAAA-3	5-TTYCCA/TGGRAA-3
motif796	Meis2|TGACA	MEIS2	17	12	0.27	5-TGACA/TGTCA-3	5-TGACA/TGTCA-3
motif56	DGCR8|NTTTGCA	DGCR8	4	9	0.2715	5-ATTTGCA/TGCAAAT-3	5-NTTTGCA/TGCAAAN-3
motif131	HP1BP3|TTTCCAR	HP1BP3	4	9	0.2715	5-TTTCCAG/CTGGAAA-3	5-TTTCCAR/YTGGAAA-3
motif208	NR4A2|AWTTGGA	NR4A2	5	2	0.272	5-AATTGGA/TCCAAAT-3	5-AWTTGGA/TCCAAWT-3
motif923	HMX3|NTAAKTG	HMX3	5	2	0.272	5-TTAATTG/CAATTAA-3	5-NTAAKTG/CAMTTAN-3
motif579	Sox5_2|AATNATG|PB0176	SOX5	9	5	0.2874	5-AATTATG/CATAATT-3	5-AATNATG/CATNATT-3
motif969	NKX6-2|NTAATKR	NKX6-2	9	5	0.2874	5-TTAATTA/TAATTAA-3	5-NTAATKR/YMATTAN-3
motif87	FIP1L1|WSAAGGTR	FIP1L1	2	6	0.292	5-TCAAGGTG/CACCTTCA-3	5-WSAAGGTR/YACCTTSW-3
motif167	MAP4K2|TTGAMAG	MAP4K2	2	6	0.292	5-TTGAAAG/CTGTCAA-3	5-TTGAMAG/CTKTCAA-3
motif529	Foxl1_2|TKTTGTTWTR|PB0123	FOXL1	2	6	0.292	5-TTTTGTTTTG/CAAAACAAAA-3	5-TKTTGTTWTR/YAWAACAAMA-3
motif489	NFATC2|TTTTCCA|MA0152	NFATC2	8	14	0.2942	5-TTTTCCA/TGGAAAA-3	5-TTTTCCA/TGGAAAA-3
motif33	CDK2AP1|AATGG	CDK2AP1	14	9	0.2964	5-AATGG/CCATT-3	5-AATGG/CCATT-3
motif207	NR4A1|AKGTS	NR4A1	33	27	0.3019	5-ATGTC/GACAT-3	5-AKGTS/SACMT-3
motif227	PHTF1|TTATTT	PHTF1	13	21	0.3034	5-TTATTT/AAATAA-3	5-TTATTT/AAATAA-3
motif31	CCDC25|AAATNR	CCDC25	19	28	0.3101	5-AAATTG/CAATTT-3	5-AAATNR/YNATTT-3
motif263	RBBP9|TKAAAR	RBBP9	26	37	0.3131	5-TTAAAA/TTTTAA-3	5-TKAAAR/YTTTMA-3
motif182	MSI1|TACAMA	MSI1	9	15	0.3161	5-TACACA/TGTGTA-3	5-TACAMA/TKTGTA-3
motif1035	NFIX_2|TTGGCA	NFIX	15	10	0.3166	5-TTGGCA/TGCCAA-3	5-TTGGCA/TGCCAA-3
motif136	ID2|GAYGWC	ID2	6	3	0.3275	5-GACGAC/GTCATC-3	5-GAYGWC/GWCRTC-3
motif454	Sox17|CATTGTS|MA0078	SOX17	6	3	0.3275	5-CATTGTC/GACAATG-3	5-CATTGTS/SACAATG-3
motif893	FOXJ3|TTGTTTAY	FOXJ3	6	3	0.3275	5-TTGTTTAC/GTAAACAA-3	5-TTGTTTAY/RTAAACAA-3
motif957	MEOX2|TAATTAN	MEOX2	6	3	0.3275	5-TAATTAC/GTAATTA-3	5-TAATTAN/NTAATTA-3
motif2064	ZXDB|AGGGTG|M06202	ZXDB	6	3	0.3275	5-AGGGTG/CACCCT-3	5-AGGGTG/CACCCT-3
motif125	HNRPC|MAAAKCA	HNRNPC	10	17	0.3353	5-CAAAGCA/TGCTTTG-3	5-MAAAKCA/TGMTTTK-3
motif340	TIA1|TTTKCTT	TIA1	22	17	0.337	5-TTTGCTT/AAGCAAA-3	5-TTTKCTT/AAGMAAA-3
motif193	NAP1L1|YCAGGS	NAP1L1	11	7	0.3465	5-CCAGGC/GCCTGG-3	5-YCAGGS/SCCTGR-3
motif200	NKX2-3|ATTWCAG	NKX2-3	11	7	0.3465	5-ATTACAG/CTGTAAT-3	5-ATTWCAG/CTGWAAT-3
motif332	TFAP2C|AWTWGSAW	TFAP2C	11	7	0.3465	5-ATTTGGAA/TTCCAAAT-3	5-AWTWGSAW/WTSCWAWT-3
motif37	CHES1|WCCAGGG	FOXN3	3	7	0.3474	5-TCCAGGG/CCCTGGA-3	5-WCCAGGG/CCCTGGW-3
motif57	DHX36|AAWWTTCC	DHX36	3	7	0.3474	5-AAATTTCC/GGAAATTT-3	5-AAWWTTCC/GGAAWWTT-3
motif1121	TCF12_disc2|TGTTTRCW	TCF12	3	7	0.3474	5-TGTTTACT/AGTAAACA-3	5-TGTTTRCW/WGYAAACA-3
motif189	MYF6|MATYTG	MYF6	16	12	0.3507	5-CATCTG/CAGATG-3	5-MATYTG/CARATK-3
motif90	FOSL1|ATGAWKKMA	FOSL1	3	1	0.3566	5-ATGAAGTCA/TGAAATCAT-3	5-ATGAWKKMA/TKMMWTCAT-3
motif103	GTF3C2|GAGCCC	GTF3C2	3	1	0.3566	5-GAGCCC/GGGCTC-3	5-GAGCCC/GGGCTC-3
motif104	GTF3C5|GTGACC	GTF3C5	3	1	0.3566	5-GTGACC/GGTCAC-3	5-GTGACC/GGTCAC-3
motif223	PDE6H|TTWATGMG	PDE6H	3	1	0.3566	5-TTAATGAG/CTCATAAA-3	5-TTWATGMG/CKCATWAA-3
motif503	HIF1A_ARNT|ACGTG|MA0259	ARNT|HIF1A	3	1	0.3566	5-ACGTG/CACGT-3	5-ACGTG/CACGT-3
motif944	ISL2|NTAAKTGN	ISL2	3	1	0.3566	5-TTAAGTGC/GCACTTAA-3	5-NTAAKTGN/NCAMTTAN-3
motif966	NKX3-2|TAAGTGN	NKX3-2	3	1	0.3566	5-TAAGTGG/CCACTTA-3	5-TAAGTGN/NCACTTA-3
motif1031	NR2F1_4|ARRGGTCA	NR2F1	3	1	0.3566	5-AAAGGTCA/TGACCTTT-3	5-ARRGGTCA/TGACCYYT-3
motif1334	HNF-3beta|TRTTTRYTT|M03384	FOXA2	3	1	0.3566	5-TATTTATTT/AAATAAATA-3	5-TRTTTRYTT/AARYAAAYA-3
motif2052	ZXDA|GWCCCC|M06190	ZXDA	3	1	0.3566	5-GACCCC/GGGGTC-3	5-GWCCCC/GGGGWC-3
motif2053	ZXDB|SWCCCC|M06191	ZXDB	3	1	0.3566	5-GACCCC/GGGGTC-3	5-SWCCCC/GGGGWS-3
motif2746	Six6|TGATACCC|UP00008	SIX6	3	1	0.3566	5-TGATACCC/GGGTATCA-3	5-TGATACCC/GGGTATCA-3
motif399	ZNF207|ATTTKA	ZNF207	33	45	0.3634	5-ATTTGA/TCAAAT-3	5-ATTTKA/TMAAAT-3
motif63	DTL|AAMTRA	DTL	17	13	0.3658	5-AACTGA/TCAGTT-3	5-AAMTRA/TYAKTT-3
motif902	FOXP3|TGTTTAY	FOXP3	7	4	0.3724	5-TGTTTAC/GTAAACA-3	5-TGTTTAY/RTAAACA-3
motif967	NKX6-1|TTAATKR	NKX6-1	7	4	0.3724	5-TTAATTA/TAATTAA-3	5-TTAATKR/YMATTAA-3
motif162	LUZP2|TGMAAATS	LUZP2	1	4	0.3768	5-TGAAAATC/GATTTGCA-3	5-TGMAAATS/SATTTKCA-3
motif285	RPS4X|TTCACAAG	RPS4X	1	4	0.3768	5-TTCACAAG/CTTGTGAA-3	5-TTCACAAG/CTTGTGAA-3
motif299	SMAD4|RDGTWTGC	SMAD4	1	4	0.3768	5-GTGTTTGC/GCAAACAC-3	5-RDGTWTGC/GCAWACHY-3
motif366	VAMP3|RTTKCKCA	VAMP3	1	4	0.3768	5-GTTACCCA/TGAGAAAC-3	5-RTTKCKCA/TGMGMAAY-3
motif379	ZBTB12|AAWWTTCC	ZBTB12	1	4	0.3768	5-AAAATTCC/GGAAAATT-3	5-AAWWTTCC/GGAAWWTT-3
motif493	FEV|AYTTCCTG|MA0156	FEV	1	4	0.3768	5-ATTTCCTG/CAGGAAAT-3	5-AYTTCCTG/CAGGAART-3
motif761	ELF5|ACTTCCKB	ELF5	1	4	0.3768	5-ACTTCCGG/CCGGAAGT-3	5-ACTTCCKB/VMGGAAGT-3
motif1279	CRX|YTAATCYCM|M03267	CRX	1	4	0.3768	5-TTAATCTCA/TGAGATTAA-3	5-YTAATCYCM/KGRGATTAR-3
motif2926	UA12|CAGKGCWG	GATA1	1	4	0.3768	5-CAGGGCTG/CAGCCCTG-3	5-CAGKGCWG/CWGCMCTG-3
motif358	U2AF1|WTTTCC	U2AF1	19	27	0.3791	5-ATTTCC/GGAAAT-3	5-WTTTCC/GGAAAW-3
motif17	BOLL|TGTTKTK	BOLL	13	20	0.3843	5-TGTTGTG/CACAACA-3	5-TGTTKTK/MAMAACA-3
motif93	GADD45A|TTTKMA	GADD45A	28	38	0.389	5-TTTGCA/TGAAAA-3	5-TTTKMA/TKMAAA-3
motif303	SNAPC4|MTTTGCA	SNAPC4	8	13	0.3908	5-ATTTGCA/TGCAAAT-3	5-MTTTGCA/TGCAAAK-3
motif317	SSX2|AADATGVA	SSX2	8	13	0.3908	5-AAAATGCA/TGCATTTT-3	5-AADATGVA/TBCATHTT-3
motif391	ZMAT2|GMGGG	ZMAT2	8	13	0.3908	5-GAGGG/CCCTC-3	5-GMGGG/CCCKC-3
motif389	ZFP3|MAATKRCT	ZFP3	4	8	0.392	5-AAATTACT/AGTAATTT-3	5-MAATKRCT/AGYMATTK-3
motif527	Foxj3_2|TGTTDTG|PB0121	FOXJ3	4	8	0.392	5-TGTTTTG/CAAAACA-3	5-TGTTDTG/CAHAACA-3
motif7	ANXA1|GTTKSCW	ANXA1	19	15	0.3935	5-GTTGGCA/TGCCAAC-3	5-GTTKSCW/WGSMAAC-3
motif277	RFXANK|STTTGKY	RFXANK	13	9	0.3937	5-CTTTGGC/GCCAAAG-3	5-STTTGKY/RMCAAAS-3
motif405	ZNF313|TSACCT	RNF114	13	9	0.3937	5-TCACCT/AGGTCA-3	5-TSACCT/AGGTSA-3
motif242	PQBP1|RRWTTRS	PQBP1	14	21	0.3985	5-AATTTGG/CCAAATT-3	5-RRWTTRS/SYAAWYY-3
motif119	HIST2H2AB|AYWTYTG	HIST2H2AB	20	16	0.4061	5-ACATCTG/CAGAAGT-3	5-AYWTYTG/CARAWRT-3
motif279	RKHD2|ARWTGRAW	MEX3C	8	5	0.4098	5-AAATGAAA/TTTCATTT-3	5-ARWTGRAW/WTYCAWYT-3
motif226	PHOX2A|AATTAS	PHOX2A	21	17	0.4181	5-AATTAG/CTAATT-3	5-AATTAS/STAATT-3
motif45	CSNK2B|GAAASG	CSNK2B	5	9	0.4288	5-GAAACG/CCTTTC-3	5-GAAASG/CSTTTC-3
motif402	ZNF26|TTTGGC	ZNF26	14	11	0.4326	5-TTTGGC/GCCAAA-3	5-TTTGGC/GCCAAA-3
motif65	DUSP22|TTTCAT	DUSP22	10	16	0.4326	5-TTTCAT/ATGAAA-3	5-TTTCAT/ATGAAA-3
motif66	DUSP26|CAAAGS	DUSP26	10	16	0.4326	5-CAAAGG/CCTTTG-3	5-CAAAGS/SCTTTG-3
motif76	ETFB|GASGASG	ETFB	4	2	0.4366	5-GACGACG/CCTCCTC-3	5-GASGASG/CSTCSTC-3
motif246	PRRX1|TAATTRG	PRRX1	4	2	0.4366	5-TAATTGG/CCAATTA-3	5-TAATTRG/CYAATTA-3
motif262	RBBP5|AGYAYG	RBBP5	4	2	0.4366	5-AGCACG/CATACT-3	5-AGYAYG/CRTRCT-3
motif581	Sox8_2|ATTCATG|PB0178	SOX8	4	2	0.4366	5-ATTCATG/CATGAAT-3	5-ATTCATG/CATGAAT-3
motif885	NRL|GTCAGCA	NRL	4	2	0.4366	5-GTCAGCA/TGCTGAC-3	5-GTCAGCA/TGCTGAC-3
motif917	En2|TAATTAS	EN2	4	2	0.4366	5-TAATTAG/CTAATTA-3	5-TAATTAS/STAATTA-3
motif1034	NFIA_2|TTGGCA	NFIA	4	2	0.4366	5-TTGGCA/TGCCAA-3	5-TTGGCA/TGCCAA-3
motif1258	HDAC2_disc6|TKYYTTTYTTYYYYN	HDAC2	4	2	0.4366	5-TTTTTTTCTTTTCTT/AAGAAAAGAAAAAAA-3	5-TKYYTTTYTTYYYYN/NRRRRAARAAARRMA-3
motif2765	Tbp|WTWTATAWAW|UP00029	TBP	4	2	0.4366	5-TTATATATAA/TTATATATAA-3	5-WTWTATAWAW/WTWTATAWAW-3
motif774	GATA3|TTATC	GATA3	17	24	0.4366	5-TTATC/GATAA-3	5-TTATC/GATAA-3
motif216	OLIG3|DSATTTCM	OLIG3	9	6	0.4414	5-GCATTTCA/TGAAATGC-3	5-DSATTTCM/KGAAATSH-3
motif448	Pax2|GTCAYKS|MA0067	PAX2	9	6	0.4414	5-GTCACGC/CCGTGAC-3	5-GTCAYKS/SMRTGAC-3
motif1126	RAD21_disc6|SCNSCC	RAD21	15	12	0.4482	5-CCAGCC/GGCTGG-3	5-SCNSCC/GGSNGS-3
motif1362	FOXK1|AACA|M04656	FOXK1	58	54	0.4484	5-AACA/TGTT-3	5-AACA/TGTT-3
motif108	H2AFY|ATKGC	H2AFY	34	30	0.4529	5-ATTGC/GCAAT-3	5-ATKGC/GCMAT-3
motif416	ZNF720|SATAAGM	ZNF720	2	5	0.4555	5-CATAAGA/GCTTATC-3	5-SATAAGM/KCTTATS-3
motif1392	Zfp800|NAAATMGG|M05354	ZNF800	2	5	0.4555	5-TAAATAGG/CCTATTTA-3	5-NAAATMGG/CCKATTTN-3
motif77	ETS1|ACTTCM	ETS1	6	10	0.4599	5-ACTTCC/GGAAGT-3	5-ACTTCM/KGAAGT-3
motif291	SCMH1|CATTTC	SCMH1	6	10	0.4599	5-CATTTC/GAAATG-3	5-CATTTC/GAAATG-3
motif907	BARHL2_4|TAAAYG	BARHL2	6	10	0.4599	5-TAAACG/CGTTTA-3	5-TAAAYG/CRTTTA-3
motif228	PICK1|TTGKCA	PICK1	25	21	0.4604	5-TTGTCA/TGACAA-3	5-TTGKCA/TGMCAA-3
motif290	SCC-112|CYYRMCC	PDS5A	10	7	0.4686	5-CTCGCCC/GGGCGAG-3	5-CYYRMCC/GGKYRRG-3
motif1238	POU2F2_disc2|GSWGS	POU2F2	49	45	0.4688	5-GCAGG/CCAGC-3	5-GSWGS/SCWSC-3
motif464	YY1|ATGG|MA0095	YY1	50	46	0.4733	5-ATGG/CCAT-3	5-ATGG/CCAT-3
motif310	SOX13|AAAGCM	SOX13	17	14	0.4763	5-AAAGCA/GGCTTT-3	5-AAAGCM/KGCTTT-3
motif375	YEATS4|TTTGSS	YEATS4	17	14	0.4763	5-TTTGGC/GCCAAA-3	5-TTTGSS/SSCAAA-3
motif553	Mtf1_2|TTTNWTA|PB0148	MTF1	13	19	0.4798	5-TTTCTTA/TAAGAAA-3	5-TTTNWTA/TAWNAAA-3
motif1162	GATA_disc3|YTTCCTB	GATA2	13	19	0.4798	5-TTTCCTG/CAGGAAA-3	5-YTTCCTB/VAGGAAR-3
motif11	ARNTL|GYTTATSKG	ARNTL	1	0	0.4804	5-GCTTATCGG/CCCATAAGC-3	5-GYTTATSKG/CMSATAARC-3
motif28	CBFA2T2|TKKGAGC	CBFA2T2	1	0	0.4804	5-TGGGAGC/GCTCAAA-3	5-TKKGAGC/GCTCMMA-3
motif61	DNMT3A|GCWTGCG	DNMT3A	1	0	0.4804	5-GCTTGCG/CGCAAGC-3	5-GCWTGCG/CGCAWGC-3
motif71	EIF5A2|GTCWSRGR	EIF5A2	1	0	0.4804	5-GTCACAGG/CCTGTGAC-3	5-GTCWSRGR/YCYSWGAC-3
motif95	GLYCTK|AAATKMAWT	GLYCTK	1	0	0.4804	5-AAATGAATT/AATTCATTT-3	5-AAATKMAWT/AWTKMATTT-3
motif100	GRHPR|CTSSCSS	GRHPR	1	0	0.4804	5-CTGCCCC/GGGGCAG-3	5-CTSSCSS/SSGSSAG-3
motif116	HIP2|TCCGCM	UBE2K	1	0	0.4804	5-TCCGCA/TGCGGA-3	5-TCCGCM/KGCGGA-3
motif127	HNRPLL|TKTCCRTSRT	HNRNPLL	1	0	0.4804	5-TGTCCATCAT/ACCACGGAAA-3	5-TKTCCRTSRT/AYSAYGGAMA-3
motif145	JDP2|RACAGCTS	JDP2	1	0	0.4804	5-GACAGCTG/CAGCTGTC-3	5-RACAGCTS/SAGCTGTY-3
motif146	KCNIP1|RKKGANWTNAMTG	KCNIP1	1	0	0.4804	5-AGGGACATCAATG/CAGTGATGTCCCT-3	5-RKKGANWTNAMTG/CAKTNAWNTCMMY-3
motif184	MSRA|ATCGTC	MSRA	1	0	0.4804	5-ATCGTC/GACGAT-3	5-ATCGTC/GACGAT-3
motif204	NNT|GSNCCG	NNT	1	0	0.4804	5-GCGCCG/CGGCGC-3	5-GSNCCG/CGGNSC-3
motif219	PAX3|YAATKAGMSY	PAX3	1	0	0.4804	5-CAATGAGAGC/ACGCTAATTA-3	5-YAATKAGMSY/RSKCTMATTR-3
motif331	TFAP2A|TNYGGAAANC	TFAP2A	1	0	0.4804	5-TTTGGAAAGC/GCTTTCCAAA-3	5-TNYGGAAANC/GNTTTCCRNA-3
motif360	UBE2V1|GTTTGMKG	UBE2V1	1	0	0.4804	5-GTTTGCGG/CCGCAAAC-3	5-GTTTGMKG/CMKCAAAC-3
motif400	ZNF238|ACATCTGK	ZBTB18	1	0	0.4804	5-ACATCTGG/CCAGATGT-3	5-ACATCTGK/MCAGATGT-3
motif404	ZNF304|AGSCCG	ZNF304	1	0	0.4804	5-AGCCCG/CGGCCT-3	5-AGSCCG/CGGSCT-3
motif408	ZNF385|RWTTTSCNGGG	ZNF385A	1	0	0.4804	5-ATTTTCCAGGG/CCCTGCAAAAT-3	5-RWTTTSCNGGG/CCCNGSAAAWY-3
motif424	Arnt_Ahr|YGCGTG|MA0006	AHR|ARNT	1	0	0.4804	5-TGCGTG/CACGCA-3	5-YGCGTG/CACGCR-3
motif426	CREB1|KGRTGACGY|MA0018	CREB1	1	0	0.4804	5-TGGTGACGT/ACGTCACCA-3	5-KGRTGACGY/RCGTCAYCM-3
motif429	NFIL3|TTAYGTAAY|MA0025	NFIL3	1	0	0.4804	5-TTATGTAAC/GTTACATAA-3	5-TTAYGTAAY/RTTACRTAA-3
motif501	CREB1|TGACGTCA|MA0018.2	CREB1	1	0	0.4804	5-TGACGTCA/TGACGTCA-3	5-TGACGTCA/TGACGTCA-3
motif506	Gm397_1|ATGTGCACATAN|PB0026	ZSCAN4	1	0	0.4804	5-ATGTGCACATAC/GTATGTGCACAT-3	5-ATGTGCACATAN/NTATGTGCACAT-3
motif514	Atf1_2|TVHTCGTCAT|PB0108	ATF1	1	0	0.4804	5-TATTCGTCAT/ATGACGAATA-3	5-TVHTCGTCAT/ATGACGADBA-3
motif523	Eomes_2|AGGTGTYG|PB0117	EOMES	1	0	0.4804	5-AGGTGTCG/CGACACCT-3	5-AGGTGTYG/CRACACCT-3
motif532	Gata5_2|WGATATCTN|PB0126	GATA5	1	0	0.4804	5-TGATATCTC/GAGATATCA-3	5-WGATATCTN/NAGATATCW-3
motif538	Hbp1_2|ACAATGGGR|PB0132	HBP1	1	0	0.4804	5-ACAATGGGA/TCCCATTGT-3	5-ACAATGGGR/YCCCATTGT-3
motif552	Max_2|GNCGCGTG|PB0147	MAX	1	0	0.4804	5-GTCGCGTG/CACGCGAC-3	5-GNCGCGTG/CACGCGNC-3
motif558	Nr2f2_2|TGACCCSN|PB0153	NR2F2	1	0	0.4804	5-TGACCCGG/CCGGGTCA-3	5-TGACCCSN/NSGGGTCA-3
motif562	Rara_2|TGACCCSR|PB0157	RARA	1	0	0.4804	5-TGACCCCG/CGGGGTCA-3	5-TGACCCSR/YSGGGTCA-3
motif568	Six6_2|GKATATATMS|PB0163	SIX6	1	0	0.4804	5-GGATATATCC/GGATATATCC-3	5-GKATATATMS/SKATATATMC-3
motif583	Sp4_2|NWAGGCGTG|PB0180	SP4	1	0	0.4804	5-AAAGGCGTG/CACGCCTTT-3	5-NWAGGCGTG/CACGCCTWN-3
motif605	Zfp691_2|AGGAGTC|PB0203	ZNF691	1	0	0.4804	5-AGGAGTC/GACTCCT-3	5-AGGAGTC/GACTCCT-3
motif612	Cux1_2|TGATRATCA|PH0017	CUX1	1	0	0.4804	5-TGATGATCA/TGATCATCA-3	5-TGATRATCA/TGATYATCA-3
motif632	Zfx|AGGCCKNGGC|MA0146.2	ZFX	1	0	0.4804	5-AGGCCTCGGC/GCCGAGGCCT-3	5-AGGCCKNGGC/GCCNMGGCCT-3
motif653	Gata4|YCTTATCTB|MA0482	GATA4	1	0	0.4804	5-TCTTATCTC/GAGATAAGA-3	5-YCTTATCTB/VAGATAAGR-3
motif680	EBF1|TCCCWGGRGR|MA0154.2	EBF1	1	0	0.4804	5-TCCCTGGGGA/TCCCCAGGGA-3	5-TCCCWGGRGR/YCYCCWGGGA-3
motif741	ZNF524_2|CTCGAACCCK	ZNF524	1	0	0.4804	5-CTCGAACCCG/CGGGTTCGAG-3	5-CTCGAACCCK/MGGGTTCGAG-3
motif754	CUX1_3|ATYGATNA	CUX1	1	0	0.4804	5-ATCGATTA/TAATCGAT-3	5-ATYGATNA/TNATCRAT-3
motif793	SMAD3|TGTCTAGACR	SMAD3	1	0	0.4804	5-TGTCTAGACG/CGTCTAGACA-3	5-TGTCTAGACR/YGTCTAGACA-3
motif884	NFIL3|NTTACRTAAY	NFIL3	1	0	0.4804	5-ATTACATAAC/GTTATGTAAT-3	5-NTTACRTAAY/RTTAYGTAAN-3
motif937	Hoxc10|NTTTTAYGAC	HOXC10	1	0	0.4804	5-TTTTTATGAC/GTCATAAAAA-3	5-NTTTTAYGAC/GTCRTAAAAN-3
motif941	Hoxd9_3|TTTTACGAB	HOXD9	1	0	0.4804	5-TTTTACGAC/GTCGTAAAA-3	5-TTTTACGAB/VTCGTAAAA-3
motif976	RHOXF1|NGATNAKCC	RHOXF1	1	0	0.4804	5-GGATAATCC/GGATTATCC-3	5-NGATNAKCC/GGMTNATCN-3
motif978	RHOXF1_3|GGMTWATCC	RHOXF1	1	0	0.4804	5-GGATAATCC/GGATTATCC-3	5-GGMTWATCC/GGATWAKCC-3
motif983	VSX1_2|YAATTRGC	VSX1	1	0	0.4804	5-TAATTAGC/GCTAATTA-3	5-YAATTRGC/GCYAATTR-3
motif1038	HOXD12_3|NTTTACGAC	HOXD12	1	0	0.4804	5-TTTTACGAC/GTCGTAAAA-3	5-NTTTACGAC/GTCGTAAAN-3
motif1052	GATA_disc1|SAGATAAGV	GATA1	1	0	0.4804	5-CAGATAAGG/CCTTATCTG-3	5-SAGATAAGV/BCTTATCTS-3
motif1071	FOXA_disc1|TGTTTACWYW	FOXA1	1	0	0.4804	5-TGTTTACTTT/AAAGTAAACA-3	5-TGTTTACWYW/WRWGTAAACA-3
motif1107	TATA_disc3|KKCCGGT	TAF1	1	0	0.4804	5-TTCCGGT/ACCGGAA-3	5-KKCCGGT/ACCGGMM-3
motif1110	BCL_disc5|CTTATCAG	BCL3	1	0	0.4804	5-CTTATCAG/CTGATAAG-3	5-CTTATCAG/CTGATAAG-3
motif1120	NFKB_disc2|VNNWBCCCCWSV	RELA|RELB|REL|NFKB1|NFKB2	1	0	0.4804	5-GAAATCCCCAGC/GCTGGGGATTTC-3	5-VNNWBCCCCWSV/BSWGGGGVWNNB-3
motif1141	MEF2_disc2|TCAKTTCCT	MEF2C	1	0	0.4804	5-TCATTTCCT/AGGAAATGA-3	5-TCAKTTCCT/AGGAAMTGA-3
motif1142	RFX5_disc3|AACYGATGA	RFX5	1	0	0.4804	5-AACTGATGA/TCATCAGTT-3	5-AACYGATGA/TCATCRGTT-3
motif1143	SMC3_disc2|ACCASSAGG	SMC3	1	0	0.4804	5-ACCAGCAGG/CCTGCTGGT-3	5-ACCASSAGG/CCTSSTGGT-3
motif1148	TATA_disc5|AAGCGRAA	TAF1	1	0	0.4804	5-AAGCGGAA/TTCCGCTT-3	5-AAGCGRAA/TTYCGCTT-3
motif1153	SMC3_disc3|SCAGGNGNSNS	SMC3	1	0	0.4804	5-CCAGGGGGCGG/CCGCCCCCTGG-3	5-SCAGGNGNSNS/SNSNCNCCTGS-3
motif1163	NFE2_disc3|SVCSNGVSSS	NFE2	1	0	0.4804	5-CACGTGACCC/GGGTCACGTG-3	5-SVCSNGVSSS/SSSBCNSGBS-3
motif1168	ATF3_disc3|MCCSGS	ATF3	1	0	0.4804	5-ACCCGG/CCGGGT-3	5-MCCSGS/SCSGGK-3
motif1181	TCF12_disc4|TTTCGGTT	TCF12	1	0	0.4804	5-TTTCGGTT/AACCGAAA-3	5-TTTCGGTT/AACCGAAA-3
motif1182	TATA_disc7|CTTCCKBYTYCNYY	TAF1	1	0	0.4804	5-CTTCCGCTTCCTTC/GAAGGAAGCGGAAG-3	5-CTTCCKBYTYCNYY/RRNGRARVMGGAAG-3
motif1189	AP1_disc9|ACTCATGS	FOSL1	1	0	0.4804	5-ACTCATGC/GCATGAGT-3	5-ACTCATGS/SCATGAGT-3
motif1190	NANOG_disc4|TTSANATGCA	NANOG	1	0	0.4804	5-TTGATATGCA/TGCATATCAA-3	5-TTSANATGCA/TGCATNTSAA-3
motif1191	REST_disc9|SCNSCNSSSWSNSC	REST	1	0	0.4804	5-GCACCTCGCACAGC/GCTGTGCGAGGTGC-3	5-SCNSCNSSSWSNSC/GSNSWSSSNGSNGS-3
motif1196	HNF4_disc3|AGTCCARRG	HNF4A	1	0	0.4804	5-AGTCCAAAG/CTTTGGACT-3	5-AGTCCARRG/CYYTGGACT-3
motif1201	YY1_disc2|AAACATGGCG	YY1	1	0	0.4804	5-AAACATGGCG/CGCCATGTTT-3	5-AAACATGGCG/CGCCATGTTT-3
motif1221	ETS_disc7|VVVCYNCNNNBCCC	ETS1	1	0	0.4804	5-GGACTACAGCTCCC/GGGAGCTGTAGTCC-3	5-VVVCYNCNNNBCCC/GGGVNNNGNRGBBB-3
motif1223	TCF12_disc5|DGNVVNSSWGS	TCF12	1	0	0.4804	5-GGGGCAGCTGG/CCAGCTGCCCC-3	5-DGNVVNSSWGS/SCWSSNBBNCH-3
motif1227	SP1_disc2|AAAGGGGC	SP1	1	0	0.4804	5-AAAGGGGC/GCCCCTTT-3	5-AAAGGGGC/GCCCCTTT-3
motif1230	HEY1_disc2|SSNNSNSSSSNSS	HEY1	1	0	0.4804	5-GCGGGAGCGGGGC/GCCCCGCTCCCGC-3	5-SSNNSNSSSSNSS/SSNSSSSNSNNSS-3
motif1239	EGR1_disc6|GSNGSSSGSGS	EGR1	1	0	0.4804	5-GGAGGCCGGGG/CCCCGGCCTCC-3	5-GSNGSSSGSGS/SCSCSSSCNSC-3
motif1248	YY1_disc5|SSSCNSSSSC	YY1	1	0	0.4804	5-CCGCTGCCCC/GGGGCAGCGG-3	5-SSSCNSSSSC/GSSSSNGSSS-3
motif1255	ELF1_disc3|SCNSNNSSSSS	ELF1	1	0	0.4804	5-GCGGAGGCCGG/CCGGCCTCCGC-3	5-SCNSNNSSSSS/SSSSSNNSNGS-3
motif1260	NKX3A|WWTAAGTATWT|M03236	NKX3-1	1	0	0.4804	5-AATAAGTATAT/ATATACTTATT-3	5-WWTAAGTATWT/AWATACTTAWW-3
motif1262	NF-E2|RTGACTCAGC|M03239	NFE2	1	0	0.4804	5-GTGACTCAGC/GCTGAGTCAC-3	5-RTGACTCAGC/GCTGAGTCAY-3
motif1268	POU1F1|WATAWWNATGAAD|M03252	POU1F1	1	0	0.4804	5-TATAATTATGAAT/ATTCATAATTATA-3	5-WATAWWNATGAAD/HTTCATNWWTATW-3
motif1272	B-Myb|TAACYNTTT|M03258	MYBL2	1	0	0.4804	5-TAACTGTTT/AAACAGTTA-3	5-TAACYNTTT/AAANRGTTA-3
motif1277	CREB1|ACGTCANCR|M03264	CREB1	1	0	0.4804	5-ACGTCACCA/TGGTGACGT-3	5-ACGTCANCR/YGNTGACGT-3
motif1281	MAZ|GGGGAGGG|M03271	MAZ	1	0	0.4804	5-GGGGAGGG/CCCTCCCC-3	5-GGGGAGGG/CCCTCCCC-3
motif1289	TFII-I|RGAGGGAGG|M03297	GTF2I	1	0	0.4804	5-GGAGGGAGG/CCTCCCTCC-3	5-RGAGGGAGG/CCTCCCTCY-3
motif1293	p300|CACTYCCNKY|M03304	EP300	1	0	0.4804	5-CACTCCCTGT/ACAGGGAGTG-3	5-CACTYCCNKY/RMNGGRAGTG-3
motif1296	CUTL2|ATTGATTA|M03309	CUX2	1	0	0.4804	5-ATTGATTA/TAATCAAT-3	5-ATTGATTA/TAATCAAT-3
motif1299	AP-2rep|CAGTGGG|M03314	KLF12	1	0	0.4804	5-CAGTGGG/CCCACTG-3	5-CAGTGGG/CCCACTG-3
motif1302	HMX1|CAAGTGNGTG|M03322	HMX1	1	0	0.4804	5-CAAGTGCGTG/CACGCACTTG-3	5-CAAGTGNGTG/CACNCACTTG-3
motif1309	bach2|TGACTCAB|M03335	BACH2	1	0	0.4804	5-TGACTCAC/GTGAGTCA-3	5-TGACTCAB/VTGAGTCA-3
motif1316	TEF|TTATDTWAACAT|M03349	TEF	1	0	0.4804	5-TTATATAAACAT/ATGTTTATATAA-3	5-TTATDTWAACAT/ATGTTWAHATAA-3
motif1321	DP-1|GGCGCG|M03360	TFDP1	1	0	0.4804	5-GGCGCG/CGCGCC-3	5-GGCGCG/CGCGCC-3
motif1327	NCX|CMAMTTACCG|M03372	TLX2	1	0	0.4804	5-CCAATTACCG/CGGTAATTGG-3	5-CMAMTTACCG/CGGTAAKTKG-3
motif1331	Pax-8|WNTNWTGMATGA|M03380	PAX8	1	0	0.4804	5-ATTCATGAATGA/TCATTCATGAAT-3	5-WNTNWTGMATGA/TCATKCAWNANW-3
motif1333	TGIF1|TGACAGCT|M03383	TGIF1	1	0	0.4804	5-TGACAGCT/AGCTGTCA-3	5-TGACAGCT/AGCTGTCA-3
motif1355	Foxn4|NACGC|M04646	FOXN4	1	0	0.4804	5-GACGC/GCGTC-3	5-NACGC/GCGTN-3
motif1363	FOXN1|GACGCG|M04659	FOXN1	1	0	0.4804	5-GACGCG/CGCGTC-3	5-GACGCG/CGCGTC-3
motif1364	foxn4|GACGC|M04661	FOXN4	1	0	0.4804	5-GACGC/GCGTC-3	5-GACGC/GCGTC-3
motif1365	foxn4|NACGCG|M04662	FOXN4	1	0	0.4804	5-GACGCG/CGCGTC-3	5-NACGCG/CGCGTN-3
motif1373	ZNF536|TAGCASCWG|M05303	ZNF536	1	0	0.4804	5-TAGCACCTG/CAGGTGCTA-3	5-TAGCASCWG/CWGSTGCTA-3
motif1387	Lbx1|TWAATMAGAG|M05341	LBX1	1	0	0.4804	5-TAAATAAGAG/CTCTTATTTA-3	5-TWAATMAGAG/CTCTKATTWA-3
motif1395	RLF|AATGWHGAWGC|M05358	RLF	1	0	0.4804	5-AATGTTGATGC/GCATCAACATT-3	5-AATGWHGAWGC/GCWTCDWCATT-3
motif1402	TLX|AAAAATCARD|M05380	CD46	1	0	0.4804	5-AAAAATCAGG/CCTGATTTTT-3	5-AAAAATCARD/HYTGATTTTT-3
motif1461	DRRS|TTTTCHATTGA|M05473	SALL4	1	0	0.4804	5-TTTTCTATTGA/TCAATAGAAAA-3	5-TTTTCHATTGA/TCAATDGAAAA-3
motif1581	ZNF73|TCTGTWCCA|M05623	ZNF73	1	0	0.4804	5-TCTGTACCA/TGGTACAGA-3	5-TCTGTWCCA/TGGWACAGA-3
motif1593	ZFP932|AAACCAAGCCA|M05635	ZNF124	1	0	0.4804	5-AAACCAAGCCA/TGGCTTGGTTT-3	5-AAACCAAGCCA/TGGCTTGGTTT-3
motif1615	ZNF780A|TGGGATGGAGC|M05662	ZNF780A	1	0	0.4804	5-TGGGATGGAGC/GCTCCATCCCA-3	5-TGGGATGGAGC/GCTCCATCCCA-3
motif1628	Zipro1|TGAAGGAGGM|M05676	ZSCAN21	1	0	0.4804	5-TGAAGGAGGA/TCCTCCTTCA-3	5-TGAAGGAGGM/KCCTCCTTCA-3
motif1676	ZNF470|GATATTHAACA|M05738	ZNF470	1	0	0.4804	5-GATATTCAACA/TGTTGAATATC-3	5-GATATTHAACA/TGTTDAATATC-3
motif1721	ZNF613|TATTTTTAACC|M05797	ZNF613	1	0	0.4804	5-TATTTTTAACC/GGTTAAAAATA-3	5-TATTTTTAACC/GGTTAAAAATA-3
motif1762	ZNF837|KYTTTWTKWGG|M05847	ZNF837	1	0	0.4804	5-GCTTTATGTGG/CCACATAAAGC-3	5-KYTTTWTKWGG/CCWMAWAAARM-3
motif1772	ZNF625|GWTSGAGTG|M05858	ZNF625	1	0	0.4804	5-GTTCGAGTG/CACTCGAAC-3	5-GWTSGAGTG/CACTCSAWC-3
motif1790	ZNF713|GATTATCAAC|M05879	ZNF713	1	0	0.4804	5-GATTATCAAC/GTTGATAATC-3	5-GATTATCAAC/GTTGATAATC-3
motif1792	ZNF676|GRWTTGGGTGA|M05881	ZNF676	1	0	0.4804	5-GATTTGGGTGA/TCACCCAAATC-3	5-GRWTTGGGTGA/TCACCCAAWYC-3
motif1793	ZNF709|TCTTRTGGWNN|M05882	ZNF709	1	0	0.4804	5-TCTTATGGACC/GGTCCATAAGA-3	5-TCTTRTGGWNN/NNWCCAYAAGA-3
motif1795	znf439|TAACCWTTTCT|M05884	ZNF439	1	0	0.4804	5-TAACCTTTTCT/AGAAAAGGTTA-3	5-TAACCWTTTCT/AGAAAWGGTTA-3
motif1826	ZIM3|ATTAGGNAGWG|M05919	ZIM3	1	0	0.4804	5-ATTAGGTAGAG/CTCTACCTAAT-3	5-ATTAGGNAGWG/CWCTNCCTAAT-3
motif1843	ZNF700|SATTTTGACA|M05942	ZNF700	1	0	0.4804	5-GATTTTGACA/TGTCAAAATC-3	5-SATTTTGACA/TGTCAAAATS-3
motif1857	ZNF407|TCCATGTTG|M05961	ZNF407	1	0	0.4804	5-TCCATGTTG/CAACATGGA-3	5-TCCATGTTG/CAACATGGA-3
motif1867	ZNF701|KCTGCATTCCC|M05974	ZNF701	1	0	0.4804	5-GCTGCATTCCC/GGGAATGCAGC-3	5-KCTGCATTCCC/GGGAATGCAGM-3
motif1901	ZNF729|TGRTCTCCCMA|M06015	ZNF729	1	0	0.4804	5-TGATCTCCCCA/TGGGGAGATCA-3	5-TGRTCTCCCMA/TKGGGAGAYCA-3
motif1905	ZNF98|GTTAAGDGGGA|M06019	ZNF98	1	0	0.4804	5-GTTAAGAGGGA/TCCCTCTTAAC-3	5-GTTAAGDGGGA/TCCCHCTTAAC-3
motif1930	ZNF208|KGAAGTTGC|M06048	ZNF208	1	0	0.4804	5-GGAAGTTGC/GCAACTTCC-3	5-KGAAGTTGC/GCAACTTCM-3
motif1945	ZNF716|KCGRCAYCCCC|M06068	ZNF716	1	0	0.4804	5-TCGGCACCCCC/GGGGGTGCCGA-3	5-KCGRCAYCCCC/GGGGRTGYCGM-3
motif1958	ZNF99|TAGCTGRACR|M06081	ZNF99	1	0	0.4804	5-TAGCTGGACA/TGTCCAGCTA-3	5-TAGCTGRACR/YGTYCAGCTA-3
motif1967	ZNF28|WYNGWWTTCCC|M06092	ZNF28	1	0	0.4804	5-ATGGAATTCCC/GGGAATTCCAT-3	5-WYNGWWTTCCC/GGGAAWWCNRW-3
motif1970	ZNF682|ACAGCCGCCYC|M06096	ZNF682	1	0	0.4804	5-ACAGCCGCCTC/GAGGCGGCTGT-3	5-ACAGCCGCCYC/GRGGCGGCTGT-3
motif1994	ZNF806|NGTWRAAACSM|M06124	ZNF806	1	0	0.4804	5-GGTTAAAACGA/TCGTTTTAACC-3	5-NGTWRAAACSM/KSGTTTYWACN-3
motif2016	ZNF41|AKTAAGAGARA|M06148	ZNF41	1	0	0.4804	5-ATTAAGAGAGA/TCTCTCTTAAT-3	5-AKTAAGAGARA/TYTCTCTTAMT-3
motif2018	ZNF81|TGKTTAAACGA|M06150	ZNF81	1	0	0.4804	5-TGGTTAAACGA/TCGTTTAACCA-3	5-TGKTTAAACGA/TCGTTTAAMCA-3
motif2022	ZNF132|TTRGAAATGTTYM|M06154	ZNF132	1	0	0.4804	5-TTAGAAATGTTTA/TAAACATTTCTAA-3	5-TTRGAAATGTTYM/KRAACATTTCYAA-3
motif2114	Zfp30|TTTGTAAAACC|M06264	ZFP30	1	0	0.4804	5-TTTGTAAAACC/GGTTTTACAAA-3	5-TTTGTAAAACC/GGTTTTACAAA-3
motif2146	ZNF506|GAGAAGGCTGM|M06302	ZNF506	1	0	0.4804	5-GAGAAGGCTGC/GCAGCCTTCTC-3	5-GAGAAGGCTGM/KCAGCCTTCTC-3
motif2217	ZNF227|DATCTCMGAAY|M06390	ZNF227	1	0	0.4804	5-TATCTCAGAAT/ATTCTGAGATA-3	5-DATCTCMGAAY/RTTCKGAGATH-3
motif2298	ZNF683|TTCCYAAATGC|M06484	ZNF683	1	0	0.4804	5-TTCCTAAATGC/GCATTTAGGAA-3	5-TTCCYAAATGC/GCATTTRGGAA-3
motif2340	ZNF563|GGKGCCGGMGG|M06534	ZNF563	1	0	0.4804	5-GGGGCCGGCGG/CCGCCGGCCCC-3	5-GGKGCCGGMGG/CCKCCGGCMCC-3
motif2398	ZNF480|TCTTCRGAACC|M06599	ZNF480	1	0	0.4804	5-TCTTCAGAACC/GGTTCTGAAGA-3	5-TCTTCRGAACC/GGTTCYGAAGA-3
motif2458	ZNF285|GTTCMGAAAGM|M06677	ZNF285	1	0	0.4804	5-GTTCCGAAAGA/TCTTTCGGAAC-3	5-GTTCMGAAAGM/KCTTTCKGAAC-3
motif2500	PRDM6|BTGGTACC|M06727	PRDM6	1	0	0.4804	5-GTGGTACC/GGTACCAC-3	5-BTGGTACC/GGTACCAV-3
motif2521	ZNF510|TATCATTTACC|M06751	ZNF510	1	0	0.4804	5-TATCATTTACC/GGTAAATGATA-3	5-TATCATTTACC/GGTAAATGATA-3
motif2669	Smad7|ATTTGGCVAAAC|M06931	SMAD7	1	0	0.4804	5-ATTTGGCGAAAC/GTTTCGCCAAAT-3	5-ATTTGGCVAAAC/GTTTBGCCAAAT-3
motif2698	PRDM12|GACAGKTKACC|M06981	PRDM12	1	0	0.4804	5-GACAGTTGACC/GGTCAACTGTC-3	5-GACAGKTKACC/GGTMAMCTGTC-3
motif2717	Gata5|YCTTATCAG|UP00080	GATA5	1	0	0.4804	5-TCTTATCAG/CTGATAAGA-3	5-YCTTATCAG/CTGATAAGR-3
motif2718	Gata6|WGATAAGN|UP00100	GATA6	1	0	0.4804	5-AGATAAGA/TCTTATCT-3	5-WGATAAGN/NCTTATCW-3
motif2722	Hic1|RTGCCAACC|UP00035	HIC1	1	0	0.4804	5-ATGCCAACC/GGTTGGCAT-3	5-RTGCCAACC/GGTTGGCAY-3
motif2727	Irf4|ANCGAAACY|UP00018	IRF4	1	0	0.4804	5-ATCGAAACC/GGTTTCGAT-3	5-ANCGAAACY/RGTTTCGNT-3
motif2747	Smad3|TGTCTGG|UP00000	SMAD3	1	0	0.4804	5-TGTCTGG/CCAGACA-3	5-TGTCTGG/CCAGACA-3
motif2766	Tcf1|GTTAACTAA|UP00089	HNF1A	1	0	0.4804	5-GTTAACTAA/TTAGTTAAC-3	5-GTTAACTAA/TTAGTTAAC-3
motif2769	Tcfap2c|SCCYSRGGS|UP00087	TFAP2C	1	0	0.4804	5-GCCTGAGGC/GCCTCAGGC-3	5-SCCYSRGGS/SCCYSRGGS-3
motif2778	Zfp410|WATGGGATGKM|UP00033	ZNF410	1	0	0.4804	5-TATGGGATGGA/TCCATCCCATA-3	5-WATGGGATGKM/KMCATCCCATW-3
motif2825	Hoxb8|TATTAATTRC|UP00263	HOXB8	1	0	0.4804	5-TATTAATTGC/GCAATTAATA-3	5-TATTAATTRC/GYAATTAATA-3
motif2826	Hoxc10|TTTACGAC|UP00245	HOXC10	1	0	0.4804	5-TTTACGAC/GTCGTAAA-3	5-TTTACGAC/GTCGTAAA-3
motif2843	Isx|CYAATTRG|UP00243	ISX	1	0	0.4804	5-CTAATTAG/CTAATTAG-3	5-CYAATTRG/CYAATTRG-3
motif2849	Meis1|WTTGACAGST|UP00186	MEIS1	1	0	0.4804	5-ATTGACAGCT/AGCTGTCAAT-3	5-WTTGACAGST/ASCTGTCAAW-3
motif2863	Og2x|YYAATTRR|UP00178	NOBOX	1	0	0.4804	5-CTAATTAG/CTAATTAG-3	5-YYAATTRR/YYAATTRR-3
motif2871	Pknox1|WTTGACAGSTN|UP00203	PKNOX1	1	0	0.4804	5-ATTGACAGGTC/GACCTGTCAAT-3	5-WTTGACAGSTN/NASCTGTCAAW-3
motif2872	Pknox2|ATTGACAGSYS|UP00205	PKNOX2	1	0	0.4804	5-ATTGACAGGTG/CACCTGTCAAT-3	5-ATTGACAGSYS/SRSCTGTCAAT-3
motif2887	Tcf1|TNAGTTAAC|UP00390	HNF1A	1	0	0.4804	5-TTAGTTAAC/GTTAACTAA-3	5-TNAGTTAAC/GTTAACTNA-3
motif2889	Tgif1|WWTGACAGCT|UP00122	TGIF1	1	0	0.4804	5-ATTGACAGCT/AGCTGTCAAT-3	5-WWTGACAGCT/AGCTGTCAWW-3
motif1139	NANOG_disc2|ACAAAGV	NANOG	7	11	0.4866	5-ACAAAGG/CCTTTGT-3	5-ACAAAGV/BCTTTGT-3
motif147	KIAA0907|CTTYC	KIAA0907	33	43	0.49	5-CTTTC/GAAAG-3	5-CTTYC/GRAAG-3
motif215	OLIG1|CATHTGG	OLIG1	11	8	0.4924	5-CATCTGG/CCAGATG-3	5-CATHTGG/CCADATG-3
motif268	RBM35B|MWTTGVAW	ESRP2	11	8	0.4924	5-ATTTGAAA/TTCCAAAT-3	5-MWTTGVAW/WTBCAAWK-3
motif12	ASPSCR1|WKCAATC	ASPSCR1	5	3	0.493	5-ATCAATC/GATTGAT-3	5-WKCAATC/GATTGMW-3
motif348	TPPP|WTGGYAAN	TPPP	5	3	0.493	5-ATGGCAAA/TTTACCAT-3	5-WTGGYAAN/NTTRCCAW-3
motif946	ISX_3|TAATTR	ISX	5	3	0.493	5-TAATTA/TAATTA-3	5-TAATTR/YAATTA-3
motif954	Lhx4|TAATTA	LHX4	5	3	0.493	5-TAATTA/TAATTA-3	5-TAATTA/TAATTA-3
motif50	DAZAP1|TTTCC	DAZAP1	34	44	0.4956	5-TTTCC/GGAAA-3	5-TTTCC/GGAAA-3
motif318	SSX3|TTTSC	SSX3	34	44	0.4956	5-TTTCC/GGAAA-3	5-TTTSC/GSAAA-3
motif29	CBFB|WAATG	CBFB	63	77	0.497	5-AAATG/CATTT-3	5-WAATG/CATTW-3
motif336	TGIF2LX|GRCAGC	TGIF2LX	0	2	0.5007	5-GACAGC/GCTGTC-3	5-GRCAGC/GCTGYC-3
motif376	YWHAE|ATSGWCC	YWHAE	0	2	0.5007	5-ATCGTCC/GGACGAT-3	5-ATSGWCC/GGWCSAT-3
motif573	Sox14_2|CNATTGTNT|PB0168	SOX14	0	2	0.5007	5-CCATTGTGT/ACACAATGG-3	5-CNATTGTNT/ANACAATNG-3
motif615	Gsx2|TAATTAGN|PH0036	GSX2	0	2	0.5007	5-TAATTAGC/GCTAATTA-3	5-TAATTAGN/NCTAATTA-3
motif616	Hmbox1|TTAACTAGN|PH0040	HMBOX1	0	2	0.5007	5-TTAACTAGT/ACTAGTTAA-3	5-TTAACTAGN/NCTAGTTAA-3
motif660	FLI1|NCACTTCCTGY|MA0475	FLI1	0	2	0.5007	5-CCACTTCCTGT/ACAGGAAGTGG-3	5-NCACTTCCTGY/RCAGGAAGTGN-3
motif681	ELK4|CRCTTCCGG|MA0076.2	ELK4	0	2	0.5007	5-CACTTCCGG/CCGGAAGTG-3	5-CRCTTCCGG/CCGGAAGYG-3
motif699	FOXP2|WGTAAACAV|MA0593	FOXP2	0	2	0.5007	5-AGTAAACAA/TTGTTTACT-3	5-WGTAAACAV/BTGTTTACW-3
motif701	SREBF1|VTCACCCCAY|MA0595	SREBF1	0	2	0.5007	5-ATCACCCCAC/GTGGGGTGAT-3	5-VTCACCCCAY/RTGGGGTGAB-3
motif828	RUNX2_3|WAACCGCAA	RUNX2	0	2	0.5007	5-AAACCGCAA/TTGCGGTTT-3	5-WAACCGCAA/TTGCGGTTW-3
motif899	FOXO3_2|WTGTTTAC	FOXO3	0	2	0.5007	5-TTGTTTAC/GTAAACAA-3	5-WTGTTTAC/GTAAACAW-3
motif963	NKX2-3_2|TYAAGTGG	NKX2-3	0	2	0.5007	5-TCAAGTGG/CCACTTGA-3	5-TYAAGTGG/CCACTTRA-3
motif1046	IRF_disc1|ATTGGNYR	IRF3	0	2	0.5007	5-ATTGGCTG/CAGCCAAT-3	5-ATTGGNYR/YRNCCAAT-3
motif1072	RAD21_disc2|TCTAGTGG	RAD21	0	2	0.5007	5-TCTAGTGG/CCACTAGA-3	5-TCTAGTGG/CCACTAGA-3
motif1079	RAD21_disc3|ACRAGAKGGC	RAD21	0	2	0.5007	5-ACAAGAGGGC/GCCCTCTTGT-3	5-ACRAGAKGGC/GCCMTCTYGT-3
motif1088	RXRA_disc1|TGACCTTKG	PPARGC1A	0	2	0.5007	5-TGACCTTTG/CAAAGGTCA-3	5-TGACCTTKG/CMAAGGTCA-3
motif1103	TAL1_disc2|AGATAASAG	TAL1	0	2	0.5007	5-AGATAAGAG/CTCTTATCT-3	5-AGATAASAG/CTSTTATCT-3
motif1193	GATA_disc4|KATCAGVT	GATA3	0	2	0.5007	5-TATCAGAT/ATCTGATA-3	5-KATCAGVT/ABCTGATM-3
motif1222	FOXA_disc5|AAAGKTCAA	FOXA1	0	2	0.5007	5-AAAGGTCAA/TTGACCTTT-3	5-AAAGKTCAA/TTGAMCTTT-3
motif1273	GATA-4|AGAWAAAAGRRA|M03259	GATA4	0	2	0.5007	5-AGATAAAAGGGA/TCCCTTTTATCT-3	5-AGAWAAAAGRRA/TYYCTTTTWTCT-3
motif1311	CART1|TAATTNNNATTA|M03341	ALX1	0	2	0.5007	5-TAATTAATATTA/TAATATTAATTA-3	5-TAATTNNNATTA/TAATNNNAATTA-3
motif1335	RBPJK|KTTCCCACA|M03385	RBPJ	0	2	0.5007	5-TTTCCCACA/TGTGGGAAA-3	5-KTTCCCACA/TGTGGGAAM-3
motif1341	En-1|AAGTRGTNBYY|M03396	EN1	0	2	0.5007	5-AAGTAGTTTCC/GGAAACTACTT-3	5-AAGTRGTNBYY/RRVNACYACTT-3
motif1369	Sox-1|TTWAAWATTYA|M05297	SOX1	0	2	0.5007	5-TTTAATATTCA/TGAATATTAAA-3	5-TTWAAWATTYA/TRAATWTTWAA-3
motif1377	ZNF536|AATAYGNC|M05313	ZNF536	0	2	0.5007	5-AATATGCC/GGCATATT-3	5-AATAYGNC/GNCRTATT-3
motif1884	ZNF230|TAAAAACRA|M05994	ZNF230	0	2	0.5007	5-TAAAAACGA/TCGTTTTTA-3	5-TAAAAACRA/TYGTTTTTA-3
motif1946	ZNF253|NKGCARMMGM|M06069	ZNF253	0	2	0.5007	5-TTGCAACCGC/GCGGTTGCAA-3	5-NKGCARMMGM/KCKKYTGCMN-3
motif2808	Gsh2|TAATTAGC|UP00127	GSX2	0	2	0.5007	5-TAATTAGC/GCTAATTA-3	5-TAATTAGC/GCTAATTA-3
motif2811	Hmbox1|TTAACTAGW|UP00161	HMBOX1	0	2	0.5007	5-TTAACTAGT/ACTAGTTAA-3	5-TTAACTAGW/WCTAGTTAA-3
motif2837	Ipf1|TAATTAGY|UP00124	PDX1	0	2	0.5007	5-TAATTAGC/GCTAATTA-3	5-TAATTAGY/RCTAATTA-3
motif2891	Vax1|TAATTANN|UP00215	VAX1	0	2	0.5007	5-TAATTAAC/GTTAATTA-3	5-TAATTANN/NNTAATTA-3
motif2917	SREBF1|RTCACCCCAY	SREBF1	0	2	0.5007	5-ATCACCCCAC/GTGGGGTGAT-3	5-RTCACCCCAY/RTGGGGTGAY-3
motif911	Barhl1_2|TAAN	BARHL1	126	149	0.5024	5-TAAT/ATTA-3	5-TAAN/NTTA-3
motif27	CAT|AYTTCTS	CAT	15	21	0.5059	5-ATTTCTC/CAGAAAT-3	5-AYTTCTS/SAGAART-3
motif388	ZDHHC5|GRGGG	ZDHHC5	8	12	0.5098	5-GAGGG/CCCTC-3	5-GRGGG/CCCYC-3
motif929	HOXC10|TTTWATGN	HOXC10	8	12	0.5098	5-TTTTATGG/CCATAAAA-3	5-TTTWATGN/NCATWAAA-3
motif308	SOCS4|TSMWCCCM	SOCS4	3	6	0.5107	5-TCATCCCA/TGGGAAGA-3	5-TSMWCCCM/KGGGWKSA-3
motif328	TCF3|TMATTKCW	TCF3	3	6	0.5107	5-TCATTTCT/AGAAATGA-3	5-TMATTKCW/WGMAATKA-3
motif465	ETS1|YWTCCK|MA0098	ETS1	25	33	0.511	5-TTTCCG/CGGAAA-3	5-YWTCCK/MGGAWR-3
motif73	ENO1|AATGADW	ENO1	12	9	0.5133	5-AATGAAA/ATTCATT-3	5-AATGADW/WHTCATT-3
motif1305	FOXL1|TATNTWTA|M03329	FOXL1	12	9	0.5133	5-TATTTATA/TATAAATA-3	5-TATNTWTA/TAWANATA-3
motif160	LSM6|ATGNARA	LSM6	16	22	0.5176	5-ATGAAAA/TCTTCAT-3	5-ATGNARA/TYTNCAT-3
motif511	Arid3a_2|TATCN|PB0105	ARID3A	21	18	0.5225	5-TATCA/TGATA-3	5-TATCN/NGATA-3
motif121	HLCS|CTGCC	HLCS	9	13	0.5303	5-CTGCC/GGCAG-3	5-CTGCC/GGCAG-3
motif447	Nkx2_5|WTAAKTG|MA0063	NKX2-5	9	13	0.5303	5-TTAATTG/CAATTAA-3	5-WTAAKTG/CAMTTAW-3
motif953	LMX1B|TAATTA	LMX1B	9	13	0.5303	5-TAATTA/TAATTA-3	5-TAATTA/TAATTA-3
motif188	MYEF2|HTTTGC	MYEF2	13	10	0.532	5-ATTTGC/GCAAAT-3	5-HTTTGC/GCAAAD-3
motif327	TCEAL6|CTKBCS	TCEAL6	22	19	0.5324	5-CTTCCC/GGGAAG-3	5-CTKBCS/SGVMAG-3
motif24	C2orf52|KYWGCCA	LINC00471	6	4	0.5356	5-GTTGCCA/TGGCAAC-3	5-KYWGCCA/TGGCWRM-3
motif26	CANX|MGCAC	CANX	6	4	0.5356	5-AGCAC/GTGCT-3	5-MGCAC/GTGCK-3
motif240	PPP2R3B|TTTRTRC	PPP2R3B	6	4	0.5356	5-TTTATGC/GCACAAA-3	5-TTTRTRC/GYAYAAA-3
motif436	Klf4|WARRGRAAGG|MA0039	KLF4	6	4	0.5356	5-TAAAGGAAGG/CCTTCCTTTA-3	5-WARRGRAAGG/CCTTYCYYTW-3
motif1165	NFE2_disc4|KGVSBSNGS	NFE2	6	4	0.5356	5-GGACTCAGC/GCTGAGTCC-3	5-KGVSBSNGS/SCNSVSBCM-3
motif2	ACF|TTTGYA	ACF	18	24	0.539	5-TTTGTA/TACAAA-3	5-TTTGYA/TRCAAA-3
motif169	MBTPS2|TSTTTS	MBTPS2	18	24	0.539	5-TCTTTG/CAAAGA-3	5-TSTTTS/SAAASA-3
motif144	JARID1D|MTTTG	KDM5D	36	33	0.5464	5-CTTTG/CAAAG-3	5-MTTTG/CAAAK-3
motif141	IRF6|VKTTTCS	IRF6	10	14	0.5485	5-ATTTTCC/GGAAAAT-3	5-VKTTTCS/SGAAAMB-3
motif269	RBM7|AGRAG	RBM7	31	39	0.5509	5-AGAAG/CTCCT-3	5-AGRAG/CTYCT-3
motif171	MDM2|KATTYCMG	MDM2	4	7	0.5522	5-GATTCCAG/CGGGAATA-3	5-KATTYCMG/CKGRAATM-3
motif321	SUCLG1|ATTTCWNA	SUCLG1	4	7	0.5522	5-ATTTCAAA/TTAGAAAT-3	5-ATTTCWNA/TNWGAAAT-3
motif282	RPL35|TARTK	RPL35	33	41	0.5624	5-TAATT/AATTA-3	5-TARTK/MAYTA-3
motif94	GIT2|WTSCAA	GIT2	14	12	0.5632	5-TTGCAA/TTGCAA-3	5-WTSCAA/TTGSAW-3
motif264	RBM17|WGCCC	RBM17	14	12	0.5632	5-AGCCC/GGGCT-3	5-WGCCC/GGGCW-3
motif420	ZSWIM1|ARWGCMA	ZSWIM1	14	12	0.5632	5-AATGCCA/TGGCATT-3	5-ARWGCMA/TKGCWYT-3
motif474	ZNF354C|MTCCAC|MA0130	ZNF354C	11	16	0.5639	5-ATCCAC/GTGGAT-3	5-MTCCAC/GTGGAK-3
motif156	LHX4|TAATGA	LHX4	7	5	0.5691	5-TAATGA/TCATTA-3	5-TAATGA/TCATTA-3
motif197	NFIB|STTYGC	NFIB	7	5	0.5691	5-GTTCGC/GCGAAC-3	5-STTYGC/GCRAAS-3
motif961	Meox2|TAATKA	MEOX2	7	5	0.5691	5-TAATTA/TAATTA-3	5-TAATKA/TMATTA-3
motif261	RAX|AAACBGA	RAX	5	8	0.5848	5-AAACGGA/TCAGTTT-3	5-AAACBGA/TCVGTTT-3
motif395	ZNF160|ATCCCY	ZNF160	5	8	0.5848	5-ATCCCT/AGGGAT-3	5-ATCCCY/RGGGAT-3
motif457	SPIB|TTCCKCW|MA0081	SPIB	5	8	0.5848	5-TTCCTCT/AGAGGAA-3	5-TTCCKCW/WGMGGAA-3
motif575	Sox17_2|NTGAATG|PB0170	SOX17	5	8	0.5848	5-ATGAATG/CATTCAT-3	5-NTGAATG/CATTCAN-3
motif1286	HELIOS|TTTTCCTN|M03285	IKZF2	5	8	0.5848	5-TTTTCCTT/AAGGAAAA-3	5-TTTTCCTN/NAGGAAAA-3
motif964	NKX2-8|RAGTGB	NKX2-8	16	14	0.5878	5-AAGTGG/CCACTT-3	5-RAGTGB/VCACTY-3
motif274	RFC3|AAATGSA	RFC3	13	18	0.5904	5-AAATGCA/TCCATTT-3	5-AAATGSA/TSCATTT-3
motif377	YWHAZ|AWCCCA	YWHAZ	8	6	0.5965	5-AACCCA/TGGGAT-3	5-AWCCCA/TGGGWT-3
motif309	SOD1|GAGCM	SOD1	18	16	0.609	5-GAGCC/GGCTC-3	5-GAGCM/KGCTC-3
motif9	APEX2|TTGNCADM	APEX2	2	1	0.6109	5-TTGGCAGC/GCTGCCAA-3	5-TTGNCADM/KHTGNCAA-3
motif25	C9orf156|GGCTGNG	C9orf156	2	1	0.6109	5-GGCTGCG/CGCAGCC-3	5-GGCTGNG/CNCAGCC-3
motif113	HES5|CACGCG	HES5	2	1	0.6109	5-CACGCG/CGCGTG-3	5-CACGCG/CGCGTG-3
motif117	HIRIP3|GTTGCSM	HIRIP3	2	1	0.6109	5-GTTGCCC/GGGCAAC-3	5-GTTGCSM/KSGCAAC-3
motif195	NCBP2|GACSTG	NCBP2	2	1	0.6109	5-GACCTG/CACGTC-3	5-GACSTG/CASGTC-3
motif243	PRDX5|ASGACG	PRDX5	2	1	0.6109	5-ACGACG/CGTCCT-3	5-ASGACG/CGTCST-3
motif258	RARA|AKCGKC	RARA	2	1	0.6109	5-AGCGGC/GACGCT-3	5-AKCGKC/GMCGMT-3
motif280	RNASEH2C|TTSGKMG	RNASEH2C	2	1	0.6109	5-TTCGGAG/CGACGAA-3	5-TTSGKMG/CKMCSAA-3
motif316	SSBP3|ACMTTTCC	SSBP3	2	1	0.6109	5-ACATTTCC/GGAAATGT-3	5-ACMTTTCC/GGAAAKGT-3
motif334	TFEB|CACGBG	TFEB	2	1	0.6109	5-CACGTG/CACGTG-3	5-CACGBG/CVCGTG-3
motif345	TOB2|WGGGSGC	TOB2	2	1	0.6109	5-AGGGCGC/GCCCCCA-3	5-WGGGSGC/GCSCCCW-3
motif363	USF2|CACGYG	USF2	2	1	0.6109	5-CACGTG/CACGTG-3	5-CACGYG/CRCGTG-3
motif422	TFAP2A|SCNNSNGGC|MA0003	TFAP2A	2	1	0.6109	5-CCCCCGGGC/GCCCGGGGG-3	5-SCNNSNGGC/GCCNSNNGS-3
motif433	FOXF2|TTGTTTACS|MA0030	FOXF2	2	1	0.6109	5-TTGTTTACG/CGTAAACAA-3	5-TTGTTTACS/SGTAAACAA-3
motif444	MZF1_5_13|KAKGGGNA|MA0057	MZF1	2	1	0.6109	5-GAGGGGGA/TCCCCCTA-3	5-KAKGGGNA/TNCCCMTM-3
motif565	Rfxdc2_2|TRGAKACS|PB0160	RFX7	2	1	0.6109	5-TGGATACG/CGTATCCA-3	5-TRGAKACS/SGTMTCYA-3
motif576	Sox18_2|NRAATTYN|PB0171	SOX18	2	1	0.6109	5-TGAATTCA/TGAATTCA-3	5-NRAATTYN/NRAATTYN-3
motif590	Tcf7l2_2|ATCAATCR|PB0188	TCF7L2	2	1	0.6109	5-ATCAATCA/TGATTGAT-3	5-ATCAATCR/YGATTGAT-3
motif683	GATA3|AGATAAGA|MA0037.2	GATA3	2	1	0.6109	5-AGATAAGA/TCTTATCT-3	5-AGATAAGA/TCTTATCT-3
motif952	LMX1A|TAATTAN	LMX1A	2	1	0.6109	5-TAATTAA/TTAATTA-3	5-TAATTAN/NTAATTA-3
motif971	Nkx3-1|TAAGTGG	NKX3-1	2	1	0.6109	5-TAAGTGG/CCACTTA-3	5-TAAGTGG/CCACTTA-3
motif1118	REST_disc5|SCSNGGNGC	REST	2	1	0.6109	5-CCGGGGTGC/GCACCCCGG-3	5-SCSNGGNGC/GCNCCNSGS-3
motif1175	ESRRA_disc3|ARGSTGACC	ESR1	2	1	0.6109	5-AAGGTGACC/GGTCACCTT-3	5-ARGSTGACC/GGTCASCYT-3
motif1208	TATA_disc10|GCNSSSSC	TAF1	2	1	0.6109	5-GCGGCGGC/GCCGCCGC-3	5-GCNSSSSC/GSSSSNGC-3
motif1234	BCL_disc9|SNSSSNSSS	BCLAF1	2	1	0.6109	5-CCCGCTGCC/GGCAGCGGG-3	5-SNSSSNSSS/SSSNSSSNS-3
motif1280	IRF-7|TTTCNNTTTCN|M03268	IRF7	2	1	0.6109	5-TTTCAATTTCC/GGAAATTGAAA-3	5-TTTCNNTTTCN/NGAAANNGAAA-3
motif1283	Foxm1|ARATKGAST|M03277	FOXM1	2	1	0.6109	5-AAATTGACT/AGTCAATTT-3	5-ARATKGAST/ASTCMATYT-3
motif1519	EOS|KATAACCN|M05545	EOS	2	1	0.6109	5-GATAACCA/TGGTTATC-3	5-KATAACCN/NGGTTATM-3
motif2165	Zfp260|KATNATTKTS|M06327	ZNF260	2	1	0.6109	5-TATGATTTTG/CAAAATCATA-3	5-KATNATTKTS/SAMAATNATM-3
motif2251	ZNF227|DGTAAAAAASM|M06428	ZNF227	2	1	0.6109	5-GGTAAAAAACA/TGTTTTTTACC-3	5-DGTAAAAAASM/KSTTTTTTACH-3
motif2716	Foxj3|TTTGTTTAY|UP00039	FOXJ3	2	1	0.6109	5-TTTGTTTAC/GTAAACAAA-3	5-TTTGTTTAY/RTAAACAAA-3
motif2738	Nr2f2|AAAGGTCA|UP00009	NR2F2	2	1	0.6109	5-AAAGGTCA/TGACCTTT-3	5-AAAGGTCA/TGACCTTT-3
motif2754	Sox17|WTYAATTGTTN|UP00014	SOX17	2	1	0.6109	5-ATTAATTGTTT/AAACAATTAAT-3	5-WTYAATTGTTN/NAACAATTRAW-3
motif297	SMAD2|KTDWATG	SMAD2	15	20	0.6129	5-TTGTATG/CATACAA-3	5-KTDWATG/CATWHAM-3
motif1256	BHLHE40_disc2|SSNSS	BHLHE40	33	31	0.6169	5-GCTGC/GCAGC-3	5-SSNSS/SSNSS-3
motif41	COBRA1|TTNCCAT	NELFB	9	7	0.6193	5-TTACCAT/ATGGTAA-3	5-TTNCCAT/ATGGNAA-3
motif361	UGP2|CTRSAG	UGP2	9	7	0.6193	5-CTGGAG/CTCCAG-3	5-CTRSAG/CTSYAG-3
motif67	EBF1|AAAMGGG	EBF1	1	3	0.6261	5-AAAAGGG/CCCGTTT-3	5-AAAMGGG/CCCKTTT-3
motif123	HNRPA0|MAWTTTCC	HNRNPA0	1	3	0.6261	5-AATTTTCC/GGAAAATT-3	5-MAWTTTCC/GGAAAWTK-3
motif137	IL24|TGCAAATS	IL24	1	3	0.6261	5-TGCAAATG/CATTTGCA-3	5-TGCAAATS/SATTTGCA-3
motif177	MLX|CSCAMGYG	MLX	1	3	0.6261	5-CGCAAGTG/CACGTGCG-3	5-CSCAMGYG/CRCKTGSG-3
motif298	SMAD3|TGGKCTG	SMAD3	1	3	0.6261	5-TGGGCTG/CAGACCA-3	5-TGGKCTG/CAGMCCA-3
motif337	THAP5|AANGAANGG	THAP5	1	3	0.6261	5-AATGAATGG/CCATTCATT-3	5-AANGAANGG/CCNTTCNTT-3
motif390	ZHX3|CHAAWGKGCT	ZHX3	1	3	0.6261	5-CAAAAGGGCT/AGCCCATTTG-3	5-CHAAWGKGCT/AGCMCWTTDG-3
motif437	Foxq1|WATAAACAAT|MA0040	FOXQ1	1	3	0.6261	5-AATAAACAAT/ATTGTTTATT-3	5-WATAAACAAT/ATTGTTTATW-3
motif639	RUNX2|AAACCACAR|MA0511	RUNX2	1	3	0.6261	5-AAACCACAA/TTGTGGTTT-3	5-AAACCACAR/YTGTGGTTT-3
motif794	MEIS2_2|TTGACAGS	MEIS2	1	3	0.6261	5-TTGACAGC/GCTGTCAA-3	5-TTGACAGS/SCTGTCAA-3
motif810	PAX4|TAATTAR	PAX4	1	3	0.6261	5-TAATTAG/CTAATTA-3	5-TAATTAR/YTAATTA-3
motif931	HOXC12|TTTTATTRC	HOXC12	1	3	0.6261	5-TTTTATTAC/GTAATAAAA-3	5-TTTTATTRC/GYAATAAAA-3
motif965	NKX2-8_2|TNAAGTGB	NKX2-8	1	3	0.6261	5-TCAAGTGG/CCACTTGA-3	5-TNAAGTGB/VCACTTNA-3
motif1216	EBF1_disc2|SCNNGGGV	EBF1	1	3	0.6261	5-CCCTGGGG/CCCCAGGG-3	5-SCNNGGGV/BCCCNNGS-3
motif1257	EP300_disc10|MHTTCCTBYT	EP300	1	3	0.6261	5-ACTTCCTGTT/AACAGGAAGT-3	5-MHTTCCTBYT/ARVAGGAADK-3
motif1317	FOXQ1|NATAAACAAN|M03353	FOXQ1	1	3	0.6261	5-AATAAACAAT/ATTGTTTATT-3	5-NATAAACAAN/NTTGTTTATN-3
motif1439	RREB-1|TSGWCCC|M05439	RREB1	1	3	0.6261	5-TCGACCC/GGGTCGA-3	5-TSGWCCC/GGGWCSA-3
motif1512	Zfp536|AAAACGTC|M05538	ZNF536	1	3	0.6261	5-AAAACGTC/GACGTTTT-3	5-AAAACGTC/GACGTTTT-3
motif1523	SNAP190|AATYGGYA|M05550	SNAPC4	1	3	0.6261	5-AATCGGTA/TACCGATT-3	5-AATYGGYA/TRCCRATT-3
motif2834	Hoxd10|NTTTTATTR|UP00121	HOXD10	1	3	0.6261	5-ATTTTATTG/CAATAAAAT-3	5-NTTTTATTR/YAATAAAAN-3
motif2895	Elf5|ACTTCCKS|UP00409	ELF5	1	3	0.6261	5-ACTTCCGC/GCGGAAGT-3	5-ACTTCCKS/SMGGAAGT-3
motif456	SPI1|STTCC|MA0080	SPI1	20	18	0.6274	5-CTTCC/GGAAG-3	5-STTCC/GGAAS-3
motif38	CKMT1B|TKTATG	CKMT1B	7	10	0.6334	5-TGTATG/CATAAA-3	5-TKTATG/CATAMA-3
motif132	HSF1|AAAGTKC	HSF1	7	10	0.6334	5-AAAGTGC/GAACTTT-3	5-AAAGTKC/GMACTTT-3
motif401	ZNF250|SNTTTGC	ZNF250	7	10	0.6334	5-CATTTGC/GCAAATG-3	5-SNTTTGC/GCAAANS-3
motif322	TAF1A|AAMTGCC	TAF1A	10	8	0.6388	5-AAATGCC/GGCATTT-3	5-AAMTGCC/GGCAKTT-3
motif470	Mafb|NTCAGC|MA0117	MAFB	10	8	0.6388	5-GTCAGC/GCTGAC-3	5-NTCAGC/GCTGAN-3
motif1172	AP1_disc7|SWGNSNSMDG	FOS	10	8	0.6388	5-GTGAGTCATG/CATGACTCAC-3	5-SWGNSNSMDG/CHKSNSNCWS-3
motif101	GTF2B|RTTGCS	GTF2B	11	9	0.6556	5-ATTGCC/GGCAAT-3	5-RTTGCS/SGCAAY-3
motif775	GATA4|TTATCN	GATA4	11	9	0.6556	5-TTATCT/AGATAA-3	5-TTATCN/NGATAA-3
motif776	GATA5|TTATCW	GATA5	11	9	0.6556	5-TTATCT/AGATAA-3	5-TTATCW/WGATAA-3
motif84	FEZ1|AWYTGC	FEZ1	9	12	0.6686	5-ATTTGC/GCAAAT-3	5-AWYTGC/GCARWT-3
motif178	MORG1|AWWBAAKK	WDR83	9	12	0.6686	5-ATTGAATG/CATTAAAT-3	5-AWWBAAKK/MMTTVWWT-3
motif203	NMRAL1|WCAAAMG	NMRAL1	9	12	0.6686	5-ACAAACG/CGTTTGT-3	5-WCAAAMG/CKTTTGW-3
motif1178	SPI1_disc3|RGVNVNRGGV	SPI1	12	10	0.6704	5-AGGAGGGGGC/GCCCCCTCCT-3	5-RGVNVNRGGV/BCCYNBNBCY-3
motif176	MGC10433|AAAAKG	RBM42	41	49	0.6728	5-AAAATG/CATTTT-3	5-AAAAKG/CMTTTT-3
motif6	AGGF1|MCCTBNCC	AGGF1	3	2	0.6762	5-ACCTCCCC/GGGGAGGT-3	5-MCCTBNCC/GGNVAGGK-3
motif194	NCALD|AKTARCS	NCALD	3	2	0.6762	5-ATTAACG/CGTTAAT-3	5-AKTARCS/SGYTAMT-3
motif218	P4HB|GYTGCC	P4HB	3	2	0.6762	5-GCTGCC/GGCAAC-3	5-GYTGCC/GGCARC-3
motif335	TGIF1|TGCGSG	TGIF1	3	2	0.6762	5-TGCGGG/CCCGCA-3	5-TGCGSG/CSCGCA-3
motif472	NKX3_1|TAAGTAT|MA0124	NKX3-1	3	2	0.6762	5-TAAGTAT/ATACTTA-3	5-TAAGTAT/ATACTTA-3
motif266	RBM3|TRTATG	RBM3	10	13	0.6828	5-TATATG/CATACA-3	5-TRTATG/CATAYA-3
motif396	ZNF192|TGHTTTS	ZKSCAN8	10	13	0.6828	5-TGCTTTG/CAAAGCA-3	5-TGHTTTS/SAAADCA-3
motif69	EDN1|AAAYNAAWK	EDN1	2	4	0.6889	5-AAATCAATT/AATTGATTT-3	5-AAAYNAAWK/MWTTNRTTT-3
motif202	NMI|VATTTGMA	NMI	2	4	0.6889	5-GATTTGCA/TGCAAATC-3	5-VATTTGMA/TKCAAATB-3
motif369	VPS4B|KYGCCC	VPS4B	2	4	0.6889	5-GTGCCC/GGGCAA-3	5-KYGCCC/GGGCRM-3
motif1053	POU2F2_disc1|ATTTGCAT	POU2F2	2	4	0.6889	5-ATTTGCAT/ATGCAAAT-3	5-ATTTGCAT/ATGCAAAT-3
motif1198	E2F_disc6|ATTCRAAN	E2F4	2	4	0.6889	5-ATTCAAAT/ATTTGAAT-3	5-ATTCRAAN/NTTYGAAT-3
motif1266	NKX3-2|TAAGTGGN|M03246	NKX3-2	2	4	0.6889	5-TAAGTGGA/TCCACTTA-3	5-TAAGTGGN/NCCACTTA-3
motif1353	Foxn2|TTGTTTAN|M04644	FOXN2	2	4	0.6889	5-TTGTTTAC/GTAAACAA-3	5-TTGTTTAN/NTAAACAA-3
motif2899	Sox4|AACAAWGR|UP00401	SOX4	2	4	0.6889	5-AACAAAGG/CCTTTGTT-3	5-AACAAWGR/YCWTTGTT-3
motif270	RBM8A|TGTGTM	RBM8A	11	15	0.6952	5-TGTGTA/TACACA-3	5-TGTGTM/KACACA-3
motif434	GATA3|CWATC|MA0037	GATA3	27	33	0.6984	5-CTATC/GATAG-3	5-CWATC/GATWG-3
motif18	BRUNOL4|WTMCAC	CELF4	12	16	0.7058	5-ATACAC/GTGTAT-3	5-WTMCAC/GTGKAW-3
motif522	Elf3_2|AAAAAAAN|PB0116	ELF3	12	16	0.7058	5-AAAAAAAA/TTTTTTTT-3	5-AAAAAAAN/NTTTTTTT-3
motif75	ESX1|RCTTC	ESX1	29	35	0.7078	5-ACTTC/GAAGT-3	5-RCTTC/GAAGY-3
motif241	PPP5C|RTGGM	PPP5C	34	33	0.7136	5-ATGGC/GCCAT-3	5-RTGGM/KCCAY-3
motif16	BAT4|TATTC	GPANK1	15	14	0.7138	5-TATTC/GAATA-3	5-TATTC/GAATA-3
motif150	KLF4|TTTCTSA	KLF4	4	3	0.7171	5-TTTCTGA/TCAGAAA-3	5-TTTCTSA/TSAGAAA-3
motif220	PAXIP1|AAGCTG	PAXIP1	4	3	0.7171	5-AAGCTG/CAGCTT-3	5-AAGCTG/CAGCTT-3
motif231	PITX1|AARCCC	PITX1	4	3	0.7171	5-AAGCCC/GGGCTT-3	5-AARCCC/GGGYTT-3
motif597	Zbtb3_2|NCACTGG|PB0195	ZBTB3	4	3	0.7171	5-TCACTGG/CCAGTGA-3	5-NCACTGG/CCAGTGN-3
motif968	NKX6-1_2|TTAATKA	NKX6-1	4	3	0.7171	5-TTAATTA/TAATTAA-3	5-TTAATKA/TMATTAA-3
motif972	OTX1_2|TAATCC	OTX1	4	3	0.7171	5-TAATCC/GGATTA-3	5-TAATCC/GGATTA-3
motif1207	TATA_disc9|ATWTGCAWAT	TBP	4	3	0.7171	5-ATTTGCATAT/ATATGCAAAT-3	5-ATWTGCAWAT/ATWTGCAWAT-3
motif4	ADARB1|AKNNNTTTC	ADARB1	14	18	0.7241	5-AGTAGTTTC/GAAAATACT-3	5-AKNNNTTTC/GAAANNNMT-3
motif320	STUB1|KTTTG	STUB1	37	36	0.7249	5-GTTTG/CAAAC-3	5-KTTTG/CAAAM-3
motif352	TRMT1|WAATGAA	TRMT1	3	5	0.7282	5-AAATGAA/TTCATTT-3	5-WAATGAA/TTCATTW-3
motif1300	YY1|GATGGC|M03317	YY1	3	5	0.7282	5-GATGGC/GCCATC-3	5-GATGGC/GCCATC-3
motif1344	Ikaros|TTCCCA|M03399	IKZF1	3	5	0.7282	5-TTCCCA/TGGGAA-3	5-TTCCCA/TGGGAA-3
motif2913	RUNX1|WAACCACA	BATF|BCL11A|IRF4|JUND|MEF2A|NFKB1	3	5	0.7282	5-AAACCACA/TGTGGTTT-3	5-WAACCACA/TGTGGTTW-3
motif55	DDX53|TGTGT	DDX53	17	16	0.7296	5-TGTGT/ACACA-3	5-TGTGT/ACACA-3
motif1106	CTCF_disc9|RSWGGSN	CTCF	15	19	0.7322	5-AGAGGGC/GCCCTCT-3	5-RSWGGSN/NSCCWSY-3
motif170	MCTP2|TTCCY	MCTP2	36	43	0.735	5-TTCCC/AGGAA-3	5-TTCCY/RGGAA-3
motif381	ZBTB4|SHTTTGCD	ZBTB4	5	4	0.7458	5-GTTTTGCA/TGCAAAAC-3	5-SHTTTGCD/HGCAAADS-3
motif414	ZNF706|RATTGSA	ZNF706	5	4	0.7458	5-AATTGCA/TGCAATT-3	5-RATTGSA/TSCAATY-3
motif570	Sox11_2|AATTGTN|PB0165	SOX11	5	4	0.7458	5-AATTGTT/AACAATT-3	5-AATTGTN/NACAATT-3
motif1135	ZEB1_disc1|CACCTG	ZEB1	5	4	0.7458	5-CACCTG/CAGGTG-3	5-CACCTG/CAGGTG-3
motif1220	ELF1_disc2|CYKCCGSS	ELF1	5	4	0.7458	5-CTTCCGGC/GCCGGAAG-3	5-CYKCCGSS/SSCGGMRG-3
motif2789	Bsx|YAATTR|UP00138	BSX	5	4	0.7458	5-TAATTA/TAATTA-3	5-YAATTR/YAATTR-3
motif34	CEBPG|TCMYAG	CEBPG	20	19	0.7493	5-TCATAG/CTATGA-3	5-TCMYAG/CTRKGA-3
motif179	MORN1|ATTKCT	MORN1	21	20	0.755	5-ATTTCT/AGAAAT-3	5-ATTKCT/AGMAAT-3
motif85	FEZF2|GKYTGCG	FEZF2	4	6	0.7557	5-GGCTGCG/CGCAGCC-3	5-GKYTGCG/CGCARMC-3
motif124	HNRPA1|TTTCMNAAN	HNRNPA1	4	6	0.7557	5-TTTCAGAAA/TTTCTGAAA-3	5-TTTCMNAAN/NTTNKGAAA-3
motif199	NFIX|TTTGCA	NFIX	4	6	0.7557	5-TTTGCA/TGCAAA-3	5-TTTGCA/TGCAAA-3
motif257	RAN|CAAARGGA	RAN	4	6	0.7557	5-CAAAAGGA/TCCTTTTG-3	5-CAAARGGA/TCCYTTTG-3
motif304	SNAPC5|GTTTSCVT	SNAPC5	4	6	0.7557	5-GTTTCCAT/ATGGAAAC-3	5-GTTTSCVT/ABGSAAAC-3
motif417	ZNF76|THAATGG	ZNF76	4	6	0.7557	5-TCAATGG/CCATTAA-3	5-THAATGG/CCATTDA-3
motif795	MEIS3|DTGACAG	MEIS3	4	6	0.7557	5-TTGACAG/CTGTCAA-3	5-DTGACAG/CTGTCAH-3
motif68	ECSIT|CWWTTC	ECSIT	20	24	0.7644	5-CTATTC/GAATAG-3	5-CWWTTC/GAAWWG-3
motif289	SCAND2|AAKCAA	SCAND2P	23	22	0.7655	5-AAGCAA/TTGCTT-3	5-AAKCAA/TTGMTT-3
motif133	HSPA1L|TGSCAG	HSPA1L	6	5	0.7673	5-TGCCAG/CTGCCA-3	5-TGSCAG/CTGSCA-3
motif192	NANOS1|GCRGCG	NANOS1	6	5	0.7673	5-GCAGCG/CGCCGC-3	5-GCRGCG/CGCYGC-3
motif314	SRBD1|WTTKGCA	SRBD1	6	5	0.7673	5-ATTTGCA/TGCAAAT-3	5-WTTKGCA/TGCMAAW-3
motif890	FOXD3_2|TRTTTAC	FOXD3	6	5	0.7673	5-TGTTTAC/GTAAACA-3	5-TRTTTAC/GTAAAYA-3
motif896	FOXL1|TGTTTAY	FOXL1	6	5	0.7673	5-TGTTTAC/GTAAACA-3	5-TGTTTAY/RTAAACA-3
motif980	Rhox11|WACAGC	RHOXF1	6	5	0.7673	5-AACAGC/GCTGTT-3	5-WACAGC/GCTGTW-3
motif157	LOC51035|TYACT	UBXN1	22	26	0.7746	5-TTACT/AGTAA-3	5-TYACT/AGTRA-3
motif936	Hoxa11_2|TTTWATKR	HOXA11	5	7	0.7764	5-TTTTATGG/CCATAAAA-3	5-TTTWATKR/YMATWAAA-3
motif403	ZNF3|YRAAATK	ZNF3	23	28	0.7792	5-TAAAATG/CATTTTA-3	5-YRAAATK/MATTTYR-3
motif477	BRCA1|GTTG|MA0133	BRCA1	24	29	0.7833	5-GTTG/CAAC-3	5-GTTG/CAAC-3
motif338	THRA|GTDRCC	THRA	7	6	0.7842	5-GTGACC/GGCCAC-3	5-GTDRCC/GGYHAC-3
motif495	HOXA5|MATTWVHG|MA0158	HOXA5	7	6	0.7842	5-AATTAGTG/CACTAATT-3	5-MATTWVHG/CDBWAATK-3
motif781	SOX9|YATTGTT	SOX9	7	6	0.7842	5-CATTGTT/AACAATG-3	5-YATTGTT/AACAATR-3
motif8	ANXA11|CTCCYC	ANXA11	6	8	0.7927	5-CTCCTC/GAGGAG-3	5-CTCCYC/GRGGAG-3
motif114	HHAT|AGATTK	HHAT	6	8	0.7927	5-AGATTG/CAATCT-3	5-AGATTK/MAATCT-3
motif236	POLE3|ATGRMTG	POLE3	6	8	0.7927	5-ATGACTG/CAGCCAT-3	5-ATGRMTG/CAKYCAT-3
motif1359	FOXJ1|TAAACA|M04651	FOXJ1	6	8	0.7927	5-TAAACA/TGTTTA-3	5-TAAACA/TGTTTA-3
motif81	EXOSC3|TTCCM	EXOSC3	28	33	0.7979	5-TTCCA/TGGAA-3	5-TTCCM/KGGAA-3
motif185	MSRB3|AKGTCA	MSRB3	8	7	0.798	5-ATGTCA/TGACAT-3	5-AKGTCA/TGACMT-3
motif2920	TAL1|TTATCTBY	TAL1	7	9	0.8059	5-TTATCTCT/AGAGATAA-3	5-TTATCTBY/RVAGATAA-3
motif97	GPAM|ATGGG	GPAM	9	8	0.8095	5-ATGGG/CCCAT-3	5-ATGGG/CCCAT-3
motif60	DLX6|KWAATG	DLX6	36	36	0.8133	5-TAAATG/CATTTA-3	5-KWAATG/CATTWM-3
motif908	BARHL2_5|TAATTG	BARHL2	8	10	0.817	5-TAATTG/CAATTA-3	5-TAATTG/CAATTA-3
motif148	KIF22|ATGAG	KIF22	37	43	0.8226	5-ATGAG/CTCAT-3	5-ATGAG/CTCAT-3
motif151	LARP1|WGNAAATS	LARP1	9	11	0.8264	5-AGCAAATC/GATTTGCA-3	5-WGNAAATS/SATTTNCW-3
motif326	TCEAL2|KWAATGR	TCEAL2	9	11	0.8264	5-GAAATGG/CCATTTC-3	5-KWAATGR/YCATTWM-3
motif479	ELF5|AYWTCCT|MA0136	ELF5	9	11	0.8264	5-ACTTCCT/AGGAAGT-3	5-AYWTCCT/AGGAWRT-3
motif349	TRIM21|GSCTGS	TRIM21	11	10	0.8278	5-GGCTGG/CCAGCC-3	5-GSCTGS/SCAGSC-3
motif82	FAM119B|AAATAA	METTL21B	41	47	0.8309	5-AAATAA/TTATTT-3	5-AAATAA/TTATTT-3
motif1150	RAD21_disc10|CCYCWGS	RAD21	12	11	0.8352	5-CCCCTGG/CCAGGGG-3	5-CCYCWGS/SCWGRGG-3
motif488	ARID3A|TTTRAT|MA0151	ARID3A	11	14	0.8417	5-TTTAAT/ATTAAA-3	5-TTTRAT/ATYAAA-3
motif3	ACO1|AAAACG	ACO1	13	16	0.8529	5-AAAACG/CGTTTT-3	5-AAAACG/CGTTTT-3
motif392	ZMAT4|ATTTCA	ZMAT4	13	16	0.8529	5-ATTTCA/TGAAAT-3	5-ATTTCA/TGAAAT-3
motif1481	ALF|TWNNNGGWV|M05500	AFM	15	15	0.8567	5-TACCTGGAG/CTCCAGGTA-3	5-TWNNNGGWV/BWCCNNNWA-3
motif283	RPL6|CATTTG	RPL6	14	17	0.8577	5-CATTTG/CAAATG-3	5-CATTTG/CAAATG-3
motif234	PLAGL1|AWTKAG	PLAGL1	16	16	0.8608	5-AATTAG/CTAATT-3	5-AWTKAG/CTMAWT-3
motif105	GTPBP1|TTRTGA	GTPBP1	17	17	0.8647	5-TTATGA/TCATAA-3	5-TTRTGA/TCAYAA-3
motif54	DDX43|TTTGRMA	DDX43	16	19	0.8661	5-TTTGAAA/TTCCAAA-3	5-TTTGRMA/TKYCAAA-3
motif22	C19orf40|CWTTGR	C19orf40	18	18	0.8682	5-CATTGA/CCAATG-3	5-CWTTGR/YCAAWG-3
motif410	ZNF510|AYCT	ZNF510	75	84	0.8732	5-ACCT/AGGT-3	5-AYCT/AGRT-3
motif1319	CIZ|TTTTTS|M03355	ZNF384	19	22	0.8765	5-TTTTTC/GAAAAA-3	5-TTTTTS/SAAAAA-3
motif102	GTF2H3|AYWTCT	GTF2H3	21	21	0.8775	5-ATTTCT/AGAAAT-3	5-AYWTCT/AGAWRT-3
motif271	RBM9|WTTKCA	RBFOX2	21	24	0.8823	5-ATTGCA/TGCAAT-3	5-WTTKCA/TGMAAW-3
motif14	BAD|GTKGC	BAD	23	23	0.8827	5-GTGGC/GCCAC-3	5-GTKGC/GCMAC-3
motif42	CPSF4|YTTTSC	CPSF4	23	27	0.8874	5-TTTTCC/GGAAAA-3	5-YTTTSC/GSAAAR-3
motif1195	NR3C1_disc6|VDGVVS	NR3C1	25	29	0.8916	5-GGGGAC/GTCCCC-3	5-VDGVVS/SBBCHB-3
motif293	SF1|ATTTTW	SF1	38	40	0.9101	5-ATTTTA/TAAAAT-3	5-ATTTTW/WAAAAT-3
motif382	ZBTB43|AATGA	ZBTB43	65	69	0.9309	5-AATGA/TCATT-3	5-AATGA/TCATT-3
motif419	ZRSR2|AAATK	ZRSR2	68	75	0.9331	5-AAATT/AATTT-3	5-AAATK/MATTT-3
motif23	C1orf176|AAWYAGC	EXO5	9	9	1	5-AAACAGC/GCTATTT-3	5-AAWYAGC/GCTRWTT-3
motif44	CREB3L1|ACCACG	CREB3L1	10	11	1	5-ACCACG/CGTGGT-3	5-ACCACG/CGTGGT-3
motif49	DAB2|AATGGGA	DAB2	5	6	1	5-AATGGGA/TCCCATT-3	5-AATGGGA/TCCCATT-3
motif180	MRPL2|WYYCYTGWY	MRPL2	5	6	1	5-TTTCCTGAC/GTCAGGAAA-3	5-WYYCYTGWY/RWCARGRRW-3
motif191	MYOD1|TTAATGA	MYOD1	6	6	1	5-TTAATGA/TCATTAA-3	5-TTAATGA/TCATTAA-3
motif210	NUCB1|ATGGGAA	NUCB1	5	6	1	5-ATGGGAA/TTCCCAT-3	5-ATGGGAA/TTCCCAT-3
motif235	PLG|TCTGKC	PLG	5	6	1	5-TCTGGC/GACAGA-3	5-TCTGKC/GMCAGA-3
motif459	Sox5|ATTGTT|MA0087	SOX5	6	6	1	5-ATTGTT/AACAAT-3	5-ATTGTT/AACAAT-3
motif471	Nkx3_2|TNAGTGN|MA0122	NKX3-2	5	6	1	5-TAAGTGG/CCACTTA-3	5-TNAGTGN/NCACTNA-3
motif476	Pdx1|MATTAG|MA0132	PDX1	12	12	1	5-AATTAG/CTAATT-3	5-MATTAG/CTAATK-3
motif914	DLX1|TAATTD	DLX1	10	11	1	5-TAATTA/TAATTA-3	5-TAATTD/HAATTA-3
motif935	HOXD8|WAATTA	HOXD8	12	13	1	5-TAATTA/TAATTA-3	5-WAATTA/TAATTW-3
motif1197	BDP1_disc3|DRGSWSWGRS	POLR3A	6	6	1	5-AGGCTGTGGG/CCCACAGCCT-3	5-DRGSWSWGRS/SYCWSWSCYH-3
motif15	BARX1|AATGMAA	BARX1	4	5	1	5-AATGAAA/TTCCATT-3	5-AATGMAA/TTKCATT-3
motif19	BRUNOL5|ATMCAC	CELF5	20	22	1	5-ATACAC/GTGGAT-3	5-ATMCAC/GTGKAT-3
motif32	CD59|GRCTTYCC	CD59	1	1	1	5-GACTTCCC/GGGAAGCC-3	5-GRCTTYCC/GGRAAGYC-3
motif40	CNOT6|SMTTTNSH	CNOT6	11	11	1	5-GATTTGCC/AGCAAATC-3	5-SMTTTNSH/DSNAAAKS-3
motif47	CYB5R1|GTWTCSSA	CYB5R1	0	0	1	5-GTATCGGA/TCCGATAC-3	5-GTWTCSSA/TSSGAWAC-3
motif48	CYCS|CAAACCSCCGC	CYCS	0	0	1	5-CAAACCCCCGC/GCGGGGGTTTG-3	5-CAAACCSCCGC/GCGGSGGTTTG-3
motif51	DDEFL1|AGTARKTKRC	ASAP3	0	1	1	5-AGTAAATTAC/GTAAATTACT-3	5-AGTARKTKRC/GYMAMYTACT-3
motif52	DDX20|TTDBGAGC	DDX20	2	2	1	5-TTTTGAGC/GCTCAAAA-3	5-TTDBGAGC/GCTCVHAA-3
motif58	DIABLO|YNGCAGC	DIABLO	1	1	1	5-TGGCAGC/GCTGCCA-3	5-YNGCAGC/GCTGCNR-3
motif62	DR-1|GACCWC	DR1	4	4	1	5-GACCAC/GAGGTC-3	5-GACCWC/GWGGTC-3
motif70	EEF1D|TKMYTGKCA	EEF1D	0	1	1	5-TGATTGGCA/TGACAAGCA-3	5-TKMYTGKCA/TGMCARKMA-3
motif72	ELF2|CTTCCGG	ELF2	0	1	1	5-CTTCCGG/CCGGAAG-3	5-CTTCCGG/CCGGAAG-3
motif74	ESRRA|CAAGGWC	ESRRA	2	2	1	5-CAAGGTC/GACCTTG-3	5-CAAGGWC/GWCCTTG-3
motif78	ETV4|CTTCCGN	ETV4	0	1	1	5-CTTCCGG/CCGGAAG-3	5-CTTCCGN/NCGGAAG-3
motif88	FLI1|ACTTCCG	FLI1	3	4	1	5-ACTTCCG/CGGAAGT-3	5-ACTTCCG/CGGAAGT-3
motif96	GOT1|CAYGRCG	GOT1	0	0	1	5-CACGACG/CGCCATG-3	5-CAYGRCG/CGYCRTG-3
motif106	GTPBP6|TTNAATG	GTPBP6	8	8	1	5-TTTAATG/CATTAAA-3	5-TTNAATG/CATTNAA-3
motif110	HCFC2|GWAKCCC	HCFC2	1	1	1	5-GAAACCC/GGGATTC-3	5-GWAKCCC/GGGMTWC-3
motif115	HHEX|WAATKNM	HHEX	19	20	1	5-AAATTAC/GTAATTT-3	5-WAATKNM/KNMATTW-3
motif118	HIST1H2BN|CGCMNGCGC	HIST1H2BN	0	0	1	5-CGCATGCGC/GCGCAGGCG-3	5-CGCMNGCGC/GCGCNKGCG-3
motif120	HIST2H2BE|TGGAARYWKC	HIST2H2BE	0	1	1	5-TGGAAATTTC/GAAATTTCCA-3	5-TGGAARYWKC/GMWRYTTCCA-3
motif126	HNRPH3|TTCCAG	HNRNPH3	9	10	1	5-TTCCAG/CTGGAA-3	5-TTCCAG/CTGGAA-3
motif128	HOXB13|TTWWATGRAAA	HOXB13	0	0	1	5-TTTAATGAAAA/TTTTCATTAAA-3	5-TTWWATGRAAA/TTTYCATWWAA-3
motif134	HSPA5|CRTCACC	HSPA5	1	2	1	5-CGTCACC/GGTGACG-3	5-CRTCACC/GGTGAYG-3
motif135	HTATIP2|KTSCGC	HTATIP2	0	0	1	5-GTCCGC/GCGCAC-3	5-KTSCGC/GCGSAM-3
motif138	ING3|GWMGTC	ING3	4	5	1	5-GAAGTC/GACATC-3	5-GWMGTC/GACKWC-3
motif139	INSM1|GWKTRKKC	INSM1	3	3	1	5-GTGTGGGC/GCACACAC-3	5-GWKTRKKC/GMMYAMWC-3
motif140	IRF1|TWTTCA	IRF1	12	14	1	5-TTTTCA/TGAAAA-3	5-TWTTCA/TGAAWA-3
motif142	IVD|AATYAGC	IVD	1	2	1	5-AATCAGC/GCTAATT-3	5-AATYAGC/GCTRATT-3
motif143	JARID1A|ACCNCTG	KDM5A	0	1	1	5-ACCCCTG/CAGGGGT-3	5-ACCNCTG/CAGNGGT-3
motif149	KLF3|AATTRCW	KLF3	6	7	1	5-AATTGCA/TGCAATT-3	5-AATTRCW/WGYAATT-3
motif152	LARP4|TTCCMAWG	LARP4	2	3	1	5-TTCCCAAG/CTTGGGAA-3	5-TTCCMAWG/CWTKGGAA-3
motif154	LASS4|TSASGGT	CERS4	1	1	1	5-TGACGGT/ACCGTCA-3	5-TSASGGT/ACCSTSA-3
motif158	LOC653972|AACCSTC	CBX3	0	0	1	5-AACCCTC/GACGGTT-3	5-AACCSTC/GASGGTT-3
motif161	LUZP1|CTNCCCSC	LUZP1	0	1	1	5-CTTCCCCC/GCGGGAAG-3	5-CTNCCCSC/GSGGGNAG-3
motif165	MAGEF1|TNAATGG	MAGEF1	3	3	1	5-TTAATGG/CCATTAA-3	5-TNAATGG/CCATTNA-3
motif166	MAGOH|TMATKARMKC	MAGOH	0	0	1	5-TAATGAGCTC/GAGCTCATTA-3	5-TMATKARMKC/GMKYTMATKA-3
motif172	MECP2|GWAATG	MECP2	19	21	1	5-GAAATG/CATTAC-3	5-GWAATG/CATTWC-3
motif174	MEIS3|GACAGCTG	MEIS3	0	0	1	5-GACAGCTG/CAGCTGTC-3	5-GACAGCTG/CAGCTGTC-3
motif181	MRPS25|CATTTNNCA	MRPS25	1	1	1	5-CATTTAGCA/TGCTAAATG-3	5-CATTTNNCA/TGNNAAATG-3
motif183	MSI2|AAAYWGM	MSI2	9	10	1	5-AAACAGC/GCTGTTT-3	5-AAAYWGM/KCWRTTT-3
motif201	NME1|TCAHAAGMW	NME1	1	2	1	5-TCAAAAGCA/TGCTTTTGA-3	5-TCAHAAGMW/WKCTTDTGA-3
motif205	NOLA1|ATKKCT	GAR1	25	27	1	5-ATTTCT/AGAAAT-3	5-ATKKCT/AGMMAT-3
motif206	NONO|CAAASCC	NONO	1	1	1	5-CAAAGCC/GGCTTTG-3	5-CAAASCC/GGSTTTG-3
motif209	NRL|YSCGY	NRL	3	4	1	5-TCCGC/GCGGA-3	5-YSCGY/RCGSR-3
motif211	NUP107|AAKWTGC	NUP107	3	4	1	5-AAGATGC/GCAACTT-3	5-AAKWTGC/GCAWMTT-3
motif214	ODC1|GCRGSG	ODC1	4	4	1	5-GCGGCG/CGCCGC-3	5-GCRGSG/CSCYGC-3
motif217	OTUD4|TTCSCSC	OTUD4	0	0	1	5-TTCCCCC/GCGCGAA-3	5-TTCSCSC/GSGSGAA-3
motif222	PDCD11|ACCSYTG	PDCD11	0	1	1	5-ACCCCTG/CAGCGGT-3	5-ACCSYTG/CARSGGT-3
motif224	PDLIM5|CTCCCC	PDLIM5	9	10	1	5-CTCCCC/GGGGAG-3	5-CTCCCC/GGGGAG-3
motif225	PGAM2|CCCCKCCC	PGAM2	1	1	1	5-CCCCGCCC/GGGCGGGG-3	5-CCCCKCCC/GGGMGGGG-3
motif230	PIR|SCAGGCS	PIR	1	2	1	5-CCAGGCC/CGCCTGC-3	5-SCAGGCS/SGCCTGS-3
motif233	PKNOX2|GACAGC	PKNOX2	0	1	1	5-GACAGC/GCTGTC-3	5-GACAGC/GCTGTC-3
motif237	POLI|RAGCGC	POLI	0	0	1	5-AAGCGC/GCGCTC-3	5-RAGCGC/GCGCTY-3
motif245	PRNP|TWTCGG	PRNP	0	0	1	5-TATCGG/CCGAAA-3	5-TWTCGG/CCGAWA-3
motif248	PSMC2|GSGTTTSNGS	PSMC2	0	0	1	5-GCGTTTGCGC/GCGCAAACCC-3	5-GSGTTTSNGS/SCNSAAACSC-3
motif249	PTCD1|ACMTKWCC	PTCD1	2	3	1	5-ACATGACC/GGTAATGT-3	5-ACMTKWCC/GGWMAKGT-3
motif251	PURG|AMAKCTGG	PURG	1	1	1	5-AAATCTGG/CCAGATTT-3	5-AMAKCTGG/CCAGMTKT-3
motif253	RAB14|ACSMCGC	RAB14	0	0	1	5-ACCACGC/GCGTGGT-3	5-ACSMCGC/GCGKSGT-3
motif259	RARB|TATAAG	RARB	3	4	1	5-TATAAG/CTTATA-3	5-TATAAG/CTTATA-3
motif265	RBM22|TNRNAAATG	RBM22	2	2	1	5-TGGTAAATG/CATTTACCA-3	5-TNRNAAATG/CATTTNYNA-3
motif267	RBM35A|TSCAAAKC	ESRP1	1	1	1	5-TCCAAAGC/GCTTTGCA-3	5-TSCAAAKC/GMTTTGSA-3
motif272	RBMS1|AATMWGCA	RBMS1	1	2	1	5-AATAAGCA/TGCTAATT-3	5-AATMWGCA/TGCWKATT-3
motif275	RFX3|GTTGCCATG	RFX3	0	0	1	5-GTTGCCATG/CATGGCAAC-3	5-GTTGCCATG/CATGGCAAC-3
motif284	RPP25|TKRMAGCT	RPP25	1	2	1	5-TGGAAGCT/AGCTTCCA-3	5-TKRMAGCT/AGCTKYMA-3
motif286	RPS6KA5|GWYGTC	RPS6KA5	3	4	1	5-GTCGTC/GACAAC-3	5-GWYGTC/GACRWC-3
motif287	RUVBL1|TKYMYAWTMAWG	RUVBL1	0	1	1	5-TTTACATTAAAG/CTTAAATGAAAA-3	5-TKYMYAWTMAWG/CWTKAWTRKRMA-3
motif301	SMPX|GSYCYGG	SMPX	1	1	1	5-GGCCCGG/CCGGGCC-3	5-GSYCYGG/CCRGRSC-3
motif302	SMUG1|TWCCAYG	SMUG1	1	1	1	5-TTCCACG/CGTGGAA-3	5-TWCCAYG/CRTGGWA-3
motif306	SNRP70|AAWTTAST	SNRNP70	1	2	1	5-AAATTAGT/ACTAAATT-3	5-AAWTTAST/ASTAAWTT-3
motif307	SNRPB2|WKGTGCTK	SNRPB2	1	2	1	5-TTGTGCTG/CAGCACAA-3	5-WKGTGCTK/MAGCACMW-3
motif319	STAU2|AWAGTTWWST	STAU2	0	0	1	5-AAAGTTAACT/AGTTAACTTT-3	5-AWAGTTWWST/ASWWAACTWT-3
motif323	TAF9|CGTGG	TAF9	1	2	1	5-CGTGG/CCACG-3	5-CGTGG/CCACG-3
motif324	TAGLN2|GSYCMGG	TAGLN2	2	2	1	5-GGTCCGG/CCGGACC-3	5-GSYCMGG/CCKGRSC-3
motif325	TBPL1|ATTAAWGSC	TBPL1	0	0	1	5-ATTAATGCC/GCCATTAAT-3	5-ATTAAWGSC/GSCWTTAAT-3
motif329	TEAD1|ATGGHAAS	TEAD1	2	3	1	5-ATGGAAAC/CTTTCCAT-3	5-ATGGHAAS/STTDCCAT-3
motif333	TFE3|CNKTTTSCA	TFE3	0	1	1	5-CTGTTTCCA/TGGAAACAG-3	5-CNKTTTSCA/TGSAAAMNG-3
motif339	THRAP6|GASGWGG	MED30	3	3	1	5-GACGAGG/CCTCGTC-3	5-GASGWGG/CCWCSTC-3
motif342	TIMM44|ACCYBRC	TIMM44	3	3	1	5-ACCCCAC/GCGGGGT-3	5-ACCYBRC/GYVRGGT-3
motif346	TP73|TTBSGC	TP73	7	8	1	5-TTCCGC/GCGGAA-3	5-TTBSGC/GCSVAA-3
motif347	TPI1|GAAAGSG	TPI1	7	8	1	5-GAAAGCG/CGCTTTC-3	5-GAAAGSG/CSCTTTC-3
motif350	TRIM69|CNCANGCG	TRIM69	0	0	1	5-CGCAGGCG/CGCCTGCG-3	5-CNCANGCG/CGCNTGNG-3
motif354	TSC22D4|YTWTKGGG	TSC22D4	0	0	1	5-CTTTAGGG/CCCAAAAG-3	5-YTWTKGGG/CCCMAWAR-3
motif355	TSN|TTTSCAWT	TSN	7	7	1	5-TTTCCAAT/AATGGAAA-3	5-TTTSCAWT/AWTGSAAA-3
motif365	UTP18|TTRCMR	UTP18	16	18	1	5-TTGCAG/CTGCAA-3	5-TTRCMR/YKGYAA-3
motif367	VAX2|ATTYCWNAG	VAX2	2	3	1	5-ATTTCACAG/CTGTGAAAT-3	5-ATTYCWNAG/CTNWGRAAT-3
motif370	VSX1|KCRGTTKCNC	VSX1	2	2	1	5-TCAGTTTCCC/GGGAAACTGA-3	5-KCRGTTKCNC/GNGMAACYGM-3
motif372	WISP2|RAAGCA	WISP2	6	7	1	5-AAAGCA/TGCTTC-3	5-RAAGCA/TGCTTY-3
motif373	XG|ATRMTGRMA	XG	0	0	1	5-ATGATGGAA/TTCCATCAT-3	5-ATRMTGRMA/TKYCAKYAT-3
motif374	XRCC1|AAWKTGCT	XRCC1	1	1	1	5-AATTTGCT/AGCAAATT-3	5-AAWKTGCT/AGCAMWTT-3
motif378	ZBED1|TCAAWGG	ZBED1	0	0	1	5-TCAATGG/CCATTGA-3	5-TCAAWGG/CCWTTGA-3
motif383	ZBTB46|AAWKGCT	ZBTB46	4	5	1	5-AATTGCT/AGCAATT-3	5-AAWKGCT/AGCMWTT-3
motif384	ZC3H7A|GGDWWGYCC	ZC3H7A	1	1	1	5-GGAAAGCCC/GGGCTTACC-3	5-GGDWWGYCC/GGRCWWHCC-3
motif387	ZDHHC15|TNNNNATGG	ZDHHC15	4	4	1	5-TATCAATGG/CCATTGATA-3	5-TNNNNATGG/CCATNNNNA-3
motif393	ZNF124|TCMAAKGA	ZNF124	3	4	1	5-TCAAATGA/TCATTTGA-3	5-TCMAAKGA/TCMTTKGA-3
motif394	ZNF131|STTTGB	ZNF131	21	22	1	5-CTTTGG/ACAAAG-3	5-STTTGB/VCAAAS-3
motif398	ZNF205|CATTTTS	ZNF205	8	9	1	5-CATTTTG/CAAAATG-3	5-CATTTTS/SAAAATG-3
motif406	ZNF323|TYAWGTCMG	ZSCAN31	0	1	1	5-TCATGTCCG/CGGACATAA-3	5-TYAWGTCMG/CKGACWTRA-3
motif409	ZNF503|GWGSWGGG	ZNF503	2	2	1	5-GAGCTGGG/CCCACCTC-3	5-GWGSWGGG/CCCWSCWC-3
motif412	ZNF671|TGMCAG	ZNF671	8	8	1	5-TGACAG/CTGCCA-3	5-TGMCAG/CTGKCA-3
motif415	ZNF71|ARRGGTCA	ZNF71	2	2	1	5-AAGGGTCA/TGACCCTT-3	5-ARRGGTCA/TGACCYYT-3
motif418	ZNF766|AANCGG	ZNF766	1	2	1	5-AAGCGG/CCGCTT-3	5-AANCGG/CCGNTT-3
motif421	RUNX1|WWNTGYGGTWN|MA0002	RUNX1	1	1	1	5-TATTGTGGTTA/TAACCACAATA-3	5-WWNTGYGGTWN/NWACCRCANWW-3
motif423	Arnt|CACGTG|MA0004	ARNT	0	1	1	5-CACGTG/CACGTG-3	5-CACGTG/CACGTG-3
motif425	Pax5|CANTGNWGCGKRRCSR|MA0014	PAX5	0	0	1	5-CACTGAAGCGTAACCG/CCGCTACGCTTCAGTG-3	5-CANTGNWGCGKRRCSR/YSGYYMCGCWNCANTG-3
motif427	Ddit3_Cebpa|RTGCAATMCC|MA0019	CEBPA|DDIT3	0	1	1	5-ATGCAATCCC/GGGATTGCAT-3	5-RTGCAATMCC/GGKATTGCAY-3
motif428	E2F1|TTTSGCGC|MA0024	E2F1	0	0	1	5-TTTGGCGC/GCGCCAAA-3	5-TTTSGCGC/GCGCSAAA-3
motif431	ELK1|YTTCCGG|MA0028	ELK1	0	1	1	5-CTTCCGG/CCGGAAG-3	5-YTTCCGG/CCGGAAR-3
motif432	Mecom|TTATCTTRTCTN|MA0029	MECOM	0	0	1	5-TTATCTTATCTT/AAGATAAGATAA-3	5-TTATCTTRTCTN/NAGAYAAGATAA-3
motif435	Gfi1|MAATCANWN|MA0038	GFI1	1	2	1	5-AAATCACTG/CAGTGATTT-3	5-MAATCANWN/NWNTGATTK-3
motif438	Foxd3|AAAHAAACAWWN|MA0041	FOXD3	0	1	1	5-AAACAAACATTC/GAATGTTTGTTT-3	5-AAAHAAACAWWN/NWWTGTTTDTTT-3
motif439	FOXI1|TRTTTRTTT|MA0042	FOXI1	3	4	1	5-TGTTTGTTT/AAACAAACA-3	5-TRTTTRTTT/AAAYAAAYA-3
motif440	Foxa2|ANTRTTKRYTT|MA0047	FOXA2	1	1	1	5-AATATTTACTT/AAGTAAATATT-3	5-ANTRTTKRYTT/AARYMAAYANT-3
motif441	NHLH1|CGCAGCTGCG|MA0048	NHLH1	0	0	1	5-CGCAGCTGCG/CGCAGCTGCG-3	5-CGCAGCTGCG/CGCAGCTGCG-3
motif442	IRF1|VAAANYGAAACC|MA0050	IRF1	0	0	1	5-GAAAGCGAAACC/GGTTTCGCTTTC-3	5-VAAANYGAAACC/GGTTTCRNTTTB-3
motif445	MYC_MAX|RASCACGTGGT|MA0059	MAX|MYC	0	0	1	5-GACCACGTGGT/ACCACGTGCTC-3	5-RASCACGTGGT/ACCACGTGSTY-3
motif446	GABPA|CTTCCGGT|MA0062	GABPA	0	0	1	5-CTTCCGGT/ACCGGAAG-3	5-CTTCCGGT/ACCGGAAG-3
motif449	PBX1|TTGATTGAT|MA0070	PBX1	0	0	1	5-TTGATTGAT/ATCAATCAA-3	5-TTGATTGAT/ATCAATCAA-3
motif451	RORA_2|NWAWSTAGGTCA|MA0072	RORA	0	0	1	5-ATAAGTAGGTCA/TGACCTACTTAT-3	5-NWAWSTAGGTCA/TGACCTASWTWN-3
motif452	RREB1|CCCCMAAMCAMCCMCMMMC|MA0073	RREB1	0	0	1	5-CCCCAAACCACCCCCCCCC/GGGGGGGGGTGGTTTGGGG-3	5-CCCCMAAMCAMCCMCMMMC/GKKKGKGGKTGKTTKGGGG-3
motif453	SOX9|AACAATRG|MA0077	SOX9	1	1	1	5-AACAATGG/CCATTGTT-3	5-AACAATRG/CYATTGTT-3
motif455	SP1|ACCCHGCC|MA0079	SP1	0	0	1	5-ACCCCGCC/GGCGGGGT-3	5-ACCCHGCC/GGCDGGGT-3
motif458	SRY|ATTGTTW|MA0084	SRY	13	14	1	5-ATTGTTT/AAACAAT-3	5-ATTGTTW/WAACAAT-3
motif460	TEAD1|YACATTCCWS|MA0090	TEAD1	0	0	1	5-CACATTCCTC/GAGGAATGTG-3	5-YACATTCCWS/SWGGAATGTR-3
motif461	TAL1_TCF3|AMCATCTGKT|MA0091	TAL1|TCF3	0	0	1	5-ACCATCTGTT/AACAGATGGT-3	5-AMCATCTGKT/AMCAGATGKT-3
motif462	Hand1_Tcfe2a|NWKCCAGAY|MA0092	HAND1	1	1	1	5-ATGCCAGAC/GTCTGGCAT-3	5-NWKCCAGAY/RTCTGGMWN-3
motif463	USF1|NCACGTG|MA0093	USF1	0	1	1	5-CCACGTG/CACGTGG-3	5-NCACGTG/CACGTGN-3
motif467	Myb|CAACKGYC|MA0100	MYB	0	1	1	5-CAACGGCC/GGCCGTTG-3	5-CAACKGYC/GRCMGTTG-3
motif468	Cebpa|TTKNNCAAY|MA0102	CEBPA	1	2	1	5-TTTCGCAAT/ATTGCGAAA-3	5-TTKNNCAAY/RTTGNNMAA-3
motif469	Zfp423|KVMMCCYTRGGKKSC|MA0116	ZNF423	0	0	1	5-GCACCCCTGGGTGCC/GGCACCCAGGGGTGC-3	5-KVMMCCYTRGGKKSC/GSMMCCYARGGKKBM-3
motif473	Nobox|TAATTRSY|MA0125	NOBOX	0	0	1	5-TAATTGGT/ACCAATTA-3	5-TAATTRSY/RSYAATTA-3
motif475	HINFP|AACGTCCGC|MA0131	HINFP	0	0	1	5-AACGTCCGC/GCGGACGTT-3	5-AACGTCCGC/GCGGACGTT-3
motif478	Lhx3|WAATTAATTAWY|MA0135	LHX3	0	0	1	5-AAATTAATTAAT/ATTAATTAATTT-3	5-WAATTAATTAWY/RWTAATTAATTW-3
motif480	Stat3|TTCCNGGAAR|MA0144	STAT3	0	0	1	5-TTCCAGGAAG/CTTCCTGGAA-3	5-TTCCNGGAAR/YTTCCNGGAA-3
motif481	Myc|GCACGTGG|MA0147	MYC	0	0	1	5-GCACGTGG/CCACGTGC-3	5-GCACGTGG/CCACGTGC-3
motif482	EWSR1_FLI1|CCTTCCTTCCTTCCTTCC|MA0149	EWSR1|FLI1	0	0	1	5-CCTTCCTTCCTTCCTTCC/GGAAGGAAGGAAGGAAGG-3	5-CCTTCCTTCCTTCCTTCC/GGAAGGAAGGAAGGAAGG-3
motif483	GABPA|CACTTCCGG|MA0062.2	GABPA	0	0	1	5-CACTTCCGG/CCGGAAGTG-3	5-CACTTCCGG/CCGGAAGTG-3
motif485	Klf4|DGGGYGKGGC|MA0039.2	KLF4	0	0	1	5-TGGGTGGGGC/GCCCCACCCA-3	5-DGGGYGKGGC/GCCMCRCCCH-3
motif486	RUNX1|NAACCACAR|MA0002.2	RUNX1	2	3	1	5-AAACCACAG/CTGTGGTTT-3	5-NAACCACAR/YTGTGGTTN-3
motif487	Mycn|SCACGTGGC|MA0104.2	MYCN	0	0	1	5-GCACGTGGC/GCCACGTGC-3	5-SCACGTGGC/GCCACGTGS-3
motif490	HNF1B|YYAATRWTTAAC|MA0153	HNF1B	0	0	1	5-TTAATATTTAAC/GTTAAATATTAA-3	5-YYAATRWTTAAC/GTTAAWYATTRR-3
motif491	EBF1|MCCCHAGGGA|MA0154	EBF1	1	1	1	5-ACCCAAGGGA/TCCCTTGGGT-3	5-MCCCHAGGGA/TCCCTDGGGK-3
motif492	INSM1|TGYCWGGGGGCR|MA0155	INSM1	0	0	1	5-TGTCAGGGGGCG/CGCCCCCTGACA-3	5-TGYCWGGGGGCR/YGCCCCCWGRCA-3
motif496	NR4A2|AAGGTCAC|MA0160	NR4A2	1	2	1	5-AAGGTCAC/GTGACCTT-3	5-AAGGTCAC/GTGACCTT-3
motif498	PLAG1|CCCCCTWNGGCCCC|MA0163	PLAG1	0	0	1	5-CCCCCTTGGGCCCC/GGGGCCCAAGGGGG-3	5-CCCCCTWNGGCCCC/GGGGCCNWAGGGGG-3
motif500	SPI1|ACTTCCT|MA0080.2	SPI1	4	4	1	5-ACTTCCT/AGGAAGT-3	5-ACTTCCT/AGGAAGT-3
motif504	Arid5a_1|YAATATTN|PB0002	ARID5A	2	3	1	5-TAATATTG/CAATATTA-3	5-YAATATTN/NAATATTR-3
motif505	Bhlhb2_1|TCACGTGAS|PB0007	BHLHE40	0	0	1	5-TCACGTGAC/GTCACGTGA-3	5-TCACGTGAS/STCACGTGA-3
motif507	Sox12_1|AACAATWN|PB0062	SOX12	4	5	1	5-AACAATTA/TAATTGTT-3	5-AACAATWN/NWATTGTT-3
motif508	Tcfe2a_1|NCAGGTGC|PB0089	TCF3	0	1	1	5-ACAGGTGC/GCACCTGT-3	5-NCAGGTGC/GCACCTGN-3
motif510	Zfp128_1|GGGTACGCCM|PB0094	ZNF8	0	0	1	5-GGGTACGCCA/TGGCGTACCC-3	5-GGGTACGCCM/KGGCGTACCC-3
motif512	Arid5a_2|AATACGN|PB0106	ARID5A	0	0	1	5-AATACGA/TCGTATT-3	5-AATACGN/NCGTATT-3
motif513	Ascl2_2|GGGYGGGG|PB0107	ASCL2	0	0	1	5-GGGCGGGG/CCCCGCCC-3	5-GGGYGGGG/CCCCRCCC-3
motif515	Bbx_2|TGTTAAC|PB0109	BBX	1	1	1	5-TGTTAAC/GTTAACA-3	5-TGTTAAC/GTTAACA-3
motif516	Bcl6b_2|WGGGGCGG|PB0110	BCL6B	1	1	1	5-AGGGGCGG/CCGCCCCT-3	5-WGGGGCGG/CCGCCCCW-3
motif517	Bhlhb2_2|TNCACGTGGANNNMNGN|PB0111	BHLHE40	0	0	1	5-TACACGTGGAAGGCGGT/ACCGCCTTCCACGTGTA-3	5-TNCACGTGGANNNMNGN/NCNKNNNTCCACGTGNA-3
motif518	E2F2_2|TTGGCGCCRW|PB0112	E2F2	0	0	1	5-TTGGCGCCGA/TCGGCGCCAA-3	5-TTGGCGCCRW/WYGGCGCCAA-3
motif519	E2F3_2|NTGGCGCCRW|PB0113	E2F3	0	0	1	5-TTGGCGCCGA/TCGGCGCCAA-3	5-NTGGCGCCRW/WYGGCGCCAN-3
motif520	Egr1_2|TCCCMCTC|PB0114	EGR1	1	1	1	5-TCCCACTC/GAGTGGGA-3	5-TCCCMCTC/GAGKGGGA-3
motif525	Foxa2_2|AATAACAAN|PB0119	FOXA2	1	1	1	5-AATAACAAA/TTTGTTATT-3	5-AATAACAAN/NTTGTTATT-3
motif528	Foxk1_2|TGTTRTTRT|PB0122	FOXK1	1	1	1	5-TGTTGTTGT/ACAACAACA-3	5-TGTTRTTRT/AYAAYAACA-3
motif530	Gabpa_2|NNNNYWTCCSN|PB0124	GABPA	1	1	1	5-CCGTCTTCCCC/GGGGAAGACGG-3	5-NNNNYWTCCSN/NSGGAWRNNNN-3
motif531	Gata3_2|WGATNNNATCD|PB0125	GATA3	0	1	1	5-AGATTTTATCG/CGATAAAATCT-3	5-WGATNNNATCD/HGATNNNATCW-3
motif533	Gata6_2|CGATATCGNNGN|PB0127	GATA6	0	0	1	5-CGATATCGCAGC/GCTGCGATATCG-3	5-CGATATCGNNGN/NCNNCGATATCG-3
motif534	Gcm1_2|ATAGGGGRSRM|PB0128	GCM1	0	0	1	5-ATAGGGGAGGA/TCCTCCCCTAT-3	5-ATAGGGGRSRM/KYSYCCCCTAT-3
motif536	Gm397_2|NMGTGTGTGC|PB0130	ZSCAN4	0	0	1	5-GCGTGTGTGC/GCACACACGC-3	5-NMGTGTGTGC/GCACACACKN-3
motif537	Gmeb1_2|NACNACGTNG|PB0131	GMEB1	0	0	1	5-AACGACGTCG/CGACGTCGTT-3	5-NACNACGTNG/CNACGTNGTN-3
motif539	Hic1_2|TTGGGCAY|PB0133	HIC1	1	1	1	5-TTGGGCAC/GTGCCCAA-3	5-TTGGGCAY/RTGCCCAA-3
motif540	Hnf4a_2|AAAGTCCAMT|PB0134	HNF4A	0	0	1	5-AAAGTCCAAT/ATTGGACTTT-3	5-AAAGTCCAMT/AKTGGACTTT-3
motif541	Hoxa3_2|YTAATVGWTNNT|PB0135	HOXA3	0	0	1	5-TTAATGGTTTTT/AAAAACCATTAA-3	5-YTAATVGWTNNT/ANNAWCBATTAR-3
motif542	IRC900814_2|AAAKTCGTRA|PB0136	ARHGEF12	0	0	1	5-AAAGTCGTAA/TTACGACTTT-3	5-AAAKTCGTRA/TYACGAMTTT-3
motif543	Irf3_2|AGAANGGNSC|PB0137	IRF3	0	1	1	5-AGAAAGGTGC/GCACCTTTCT-3	5-AGAANGGNSC/GSNCCNTTCT-3
motif544	Irf4_2|AYTCTCGGW|PB0138	IRF4	0	1	1	5-ATTCTCGGT/ACCGAGAAT-3	5-AYTCTCGGW/WCCGAGART-3
motif545	Irf5_2|AYTCTCG|PB0139	IRF5	1	1	1	5-ATTCTCG/CGAGAAT-3	5-AYTCTCG/CGAGART-3
motif546	Irf6_2|NCTCTCGGN|PB0140	IRF6	0	0	1	5-ACTCTCGGT/ACCGAGAGT-3	5-NCTCTCGGN/NCCGAGAGN-3
motif547	Isgf3g_2|NAAACAKNAN|PB0141	IRF9	2	3	1	5-AAAACATTAC/GTAATGTTTT-3	5-NAAACAKNAN/NTNMTGTTTN-3
motif548	Klf7_2|ATACGCCC|PB0143	KLF7	0	0	1	5-ATACGCCC/GGGCGTAT-3	5-ATACGCCC/GGGCGTAT-3
motif550	Mafb_2|WWTTTTGCAA|PB0145	MAFB	0	1	1	5-ATTTTTGCAA/TTGCAAAAAT-3	5-WWTTTTGCAA/TTGCAAAAWW-3
motif551	Mafk_2|AAAAANTGCAN|PB0146	MAFK	0	0	1	5-AAAAATTGCAA/TTGCAATTTTT-3	5-AAAAANTGCAN/NTGCANTTTTT-3
motif554	Myb_2|CCAACTGCCR|PB0149	MYB	0	0	1	5-CCAACTGCCA/TGGCAGTTGG-3	5-CCAACTGCCR/YGGCAGTTGG-3
motif555	Mybl1_2|CCAACTGCCG|PB0150	MYBL1	0	0	1	5-CCAACTGCCG/CGGCAGTTGG-3	5-CCAACTGCCG/CGGCAGTTGG-3
motif556	Myf6_2|NACAGMCNCRCC|PB0151	MYF6	0	0	1	5-AACAGCCGCACC/GGTGCGGCTGTT-3	5-NACAGMCNCRCC/GGYGNGKCTGTN-3
motif557	Nkx3_1_2|RAGTACTY|PB0152	NKX3-1	0	0	1	5-AAGTACTT/AAGTACTT-3	5-RAGTACTY/RAGTACTY-3
motif559	Osr1_2|YWRGTAGC|PB0154	OSR1	1	1	1	5-TAGGTAGC/GCTACCTA-3	5-YWRGTAGC/GCTACYWR-3
motif560	Osr2_2|YARGTAGC|PB0155	OSR2	1	1	1	5-TAGGTAGC/GCTACCTA-3	5-YARGTAGC/GCTACYTR-3
motif561	Plagl1_2|GGTACCCCCC|PB0156	PLAGL1	0	0	1	5-GGTACCCCCC/GGGGGGTACC-3	5-GGTACCCCCC/GGGGGGTACC-3
motif563	Rfx3_2|GTAWCYANGNNNNAG|PB0158	RFX3	0	0	1	5-GTAACCAAGCGTCAG/CTGACCCTTGGTTAC-3	5-GTAWCYANGNNNNAG/CTNNNNCNTRGWTAC-3
motif566	Rxra_2|RWAGKT|PB0161	RXRA	22	23	1	5-GAAGGT/ACCTTC-3	5-RWAGKT/AMCTWY-3
motif567	Sfpi1_2|AWTTMMGGAAN|PB0162	SPI1	0	1	1	5-AATTCCGGAAC/GTTCCGGAATT-3	5-AWTTMMGGAAN/NTTCCKKAAWT-3
motif569	Smad3_2|TGGCGGGN|PB0164	SMAD3	0	0	1	5-TGGCGGGG/CCCCGCCA-3	5-TGGCGGGN/NCCCGCCA-3
motif571	Sox12_2|ANACAAAGNA|PB0166	SOX12	0	0	1	5-AGACAAAGGA/TCCTTTGTCT-3	5-ANACAAAGNA/TNCTTTGTNT-3
motif572	Sox13_2|NGGGTGGG|PB0167	SOX13	0	1	1	5-TGGGTGGG/CCCACCCA-3	5-NGGGTGGG/CCCACCCN-3
motif574	Sox15_2|AATKWCANT|PB0169	SOX15	1	2	1	5-AATTTCATT/AATGAAATT-3	5-AATKWCANT/ANTGWMATT-3
motif577	Sox1_2|TAATTGTTA|PB0172	SOX1	0	0	1	5-TAATTGTTA/TAACAATTA-3	5-TAATTGTTA/TAACAATTA-3
motif578	Sox21_2|WATTGTTC|PB0173	SOX21	3	3	1	5-AATTGTTC/GAACAATT-3	5-WATTGTTC/GAACAATW-3
motif580	Sox7_2|CNSACAATTNNNAC|PB0177	SOX7	0	0	1	5-CACACAATTAGCAC/GTGCTAATTGTGTG-3	5-CNSACAATTNNNAC/GTNNNAATTGTSNG-3
motif582	Sp100_2|TTNNNCGACG|PB0179	SP100	0	0	1	5-TTAAGCGACG/CGTCGCTTAA-3	5-TTNNNCGACG/CGTCGNNNAA-3
motif584	Spdef_2|ANATCCTANN|PB0181	SPDEF	0	0	1	5-ACATCCTAGT/ACTAGGATGT-3	5-ANATCCTANN/NNTAGGATNT-3
motif586	Sry_2|ATTGTTY|PB0183	SRY	7	8	1	5-ATTGTTC/GAACAAT-3	5-ATTGTTY/RAACAAT-3
motif587	Tbp_2|CNTWWAWSGN|PB0184	TBP	1	2	1	5-CTTAAATCGG/CCGATTTAAG-3	5-CNTWWAWSGN/NCSWTWWANG-3
motif592	Tcfap2b_2|NHGCCKSMGGCN|PB0190	TFAP2B	0	0	1	5-TTGCCTCAGGCA/TGCCTGAGGCAA-3	5-NHGCCKSMGGCN/NGCCKSMGGCDN-3
motif593	Tcfap2c_2|NGCCNNNNGGC|PB0191	TFAP2C	0	0	1	5-TGCCCTTGGGC/GCCCAAGGGCA-3	5-NGCCNNNNGGC/GCCNNNNGGCN-3
motif594	Tcfap2e_2|TTTTTTN|PB0192	TFAP2E	11	11	1	5-TTTTTTC/GAAAAAA-3	5-TTTTTTN/NAAAAAA-3
motif595	Tcfe2a_2|RMCATCTG|PB0193	TCF3	0	0	1	5-ACCATCTG/CAGATGGT-3	5-RMCATCTG/CAGATGKY-3
motif596	Zbtb12_2|GTTCTAAYG|PB0194	ZBTB12	0	0	1	5-GTTCTAATG/CATTAGAAC-3	5-GTTCTAAYG/CRTTAGAAC-3
motif598	Zbtb7b_2|VGACCACC|PB0196	ZBTB7B	0	1	1	5-AGACCACC/GGTGGTCT-3	5-VGACCACC/GGTGGTCB-3
motif599	Zfp105_2|RANTTATTGANNCR|PB0197	ZNF35	0	0	1	5-AAATTATTGAACCA/TGGTTCAATAATTT-3	5-RANTTATTGANNCR/YGNNTCAATAANTY-3
motif601	Zfp161_2|GCNNTGCGCGNC|PB0199	ZBTB14	0	0	1	5-GCACTGCGCGGC/GCCGCGCAGTGC-3	5-GCNNTGCGCGNC/GNCGCGCANNGC-3
motif602	Zfp187_2|GRACNAGGKY|PB0200	ZSCAN26	0	0	1	5-GGACAAGGGC/GCCCTTGTCC-3	5-GRACNAGGKY/RMCCTNGTYC-3
motif603	Zfp281_2|NKDNNACCCCCA|PB0201	ZNF281	0	0	1	5-AGGAGACCCCCA/TGGGGGTCTCCT-3	5-NKDNNACCCCCA/TGGGGGTNNHMN-3
motif604	Zfp410_2|CCGCCCC|PB0202	ZNF410	1	1	1	5-CCGCCCC/GGGGCGG-3	5-CCGCCCC/GGGGCGG-3
motif606	Zfp740_2|RTNCCCCCCGN|PB0204	ZNF740	0	0	1	5-ATTCCCCCCGG/CCGGGGGGAAT-3	5-RTNCCCCCCGN/NCGGGGGGNAY-3
motif607	Zic1_2|WCNCAGCAGG|PB0205	ZIC1	0	1	1	5-ACACAGCAGG/CCTGCTGTGT-3	5-WCNCAGCAGG/CCTGCTGNGW-3
motif608	Zic2_2|KCNCAGCAKG|PB0206	ZIC2	0	1	1	5-ACACAGCAGG/CCTGCTGTGT-3	5-KCNCAGCAKG/CMTGCTGNGM-3
motif609	Zic3_2|DCNCAGCAKG|PB0207	ZIC3	0	1	1	5-GCACAGCAGG/CCTGCTGTGC-3	5-DCNCAGCAKG/CMTGCTGNGH-3
motif610	Zscan4_2|TTGTGTGCYD|PB0208	ZSCAN4	0	0	1	5-TTGTGTGCTT/AAGCACACAA-3	5-TTGTGTGCYD/HRGCACACAA-3
motif611	Cux1_1|TRATCAANNNNT|PH0016	CUX1	0	0	1	5-TGATCAACCGGT/ACCGGTTGATCA-3	5-TRATCAANNNNT/ANNNNTTGATYA-3
motif613	Dlx4|TAATTAN|PH0023	DLX4	2	3	1	5-TAATTAT/ATAATTA-3	5-TAATTAN/NTAATTA-3
motif614	Dmbx1|MYTAATCCNNNY|PH0025	DMBX1	0	0	1	5-ATTAATCCGGTT/AACCGGATTAAT-3	5-MYTAATCCNNNY/RNNNGGATTARK-3
motif617	Homez|AAAACGATKWN|PH0044	HOMEZ	0	0	1	5-AAAACGATGTT/AACATCGTTTT-3	5-AAAACGATKWN/NWMATCGTTTT-3
motif618	Hoxa6|GNTAATTACC|PH0053	HOXA6	0	0	1	5-GGTAATTACC/GGTAATTACC-3	5-GNTAATTACC/GGTAATTANC-3
motif619	Hoxa7_1|NTAATTANN|PH0054	HOXA7	0	0	1	5-TTAATTAAT/ATTAATTAA-3	5-NTAATTANN/NNTAATTAN-3
motif620	Hoxa7_2|TAATTAMK|PH0055	HOXA7	0	0	1	5-TAATTACT/AGTAATTA-3	5-TAATTAMK/MKTAATTA-3
motif621	Hoxa9|NWTTTWATGGCCN|PH0056	HOXA9	0	0	1	5-AATTTTATGGCCG/CGGCCATAAAATT-3	5-NWTTTWATGGCCN/NGGCCATWAAAWN-3
motif622	Hoxd8|NAAWTAATTAATRGNT|PH0080	HOXD8	0	0	1	5-TAAATAATTAATGGCT/AGCCATTAATTAATTA-3	5-NAAWTAATTAATRGNT/ANCYATTAATTAWTTN-3
motif624	Isl2|TTAATKRNTT|PH0088	ISL2	0	0	1	5-TTAATTGATT/AATCAATTAA-3	5-TTAATKRNTT/AANYMATTAA-3
motif625	Nkx6_1_1|TAATTAATT|PH0118	NKX6-1	0	1	1	5-TAATTAATT/AATTAATTA-3	5-TAATTAATT/AATTAATTA-3
motif626	Nkx6_1_2|TAATTAATTANNYC|PH0119	NKX6-1	0	0	1	5-TAATTAATTACTTC/GAAGTAATTAATTA-3	5-TAATTAATTANNYC/GRNNTAATTAATTA-3
motif627	Obox5_1|TTAATCCC|PH0124	CRX	0	0	1	5-TTAATCCC/GGGATTAA-3	5-TTAATCCC/GGGATTAA-3
motif628	Obox5_2|TTAATCCCT|PH0125	CRX	0	1	1	5-TTAATCCCT/AGGGATTAA-3	5-TTAATCCCT/AGGGATTAA-3
motif629	Pou6f1_2|ATAATGAGNT|PH0152	POU6F1	0	1	1	5-ATAATGAGGT/ACCTCATTAT-3	5-ATAATGAGNT/ANCTCATTAT-3
motif630	Rhox11_1|WTWACAGCG|PH0157	RHOXF1	1	1	1	5-TTTACAGCG/CGCTGTAAA-3	5-WTWACAGCG/CGCTGTWAW-3
motif631	SOX10|ACAAWG|MA0442	SOX10	11	11	1	5-ACAAAG/CTTTGT-3	5-ACAAWG/CWTTGT-3
motif633	Esrrb|TGACCTTGR|MA0141.2	ESRRB	0	0	1	5-TGACCTTGA/TCAAGGTCA-3	5-TGACCTTGR/YCAAGGTCA-3
motif634	Stat5a_Stat5b|TTCTDGGAA|MA0519	STAT5A|STAT5B	0	0	1	5-TTCTTGGAA/TTCCAAGAA-3	5-TTCTDGGAA/TTCCHAGAA-3
motif635	Sox6|RRRACAAWGV|MA0515	SOX6	2	2	1	5-AAAACAATGG/CCATTGTTTT-3	5-RRRACAAWGV/BCWTTGTYYY-3
motif636	Sox3|RRRACAAAGG|MA0514	SOX3	1	1	1	5-AAAACAAAGG/CCTTTGTTTT-3	5-RRRACAAAGG/CCTTTGTYYY-3
motif637	SMAD2_SMAD3_SMAD4|TGTCTGKCACCT|MA0513	SMAD2|SMAD3|SMAD4	0	0	1	5-TGTCTGTCACCT/AGGTGACAGACA-3	5-TGTCTGKCACCT/AGGTGMCAGACA-3
motif638	Rxra|TGACCTYTG|MA0512	RXRA	0	1	1	5-TGACCTTTG/CAAAGGTCA-3	5-TGACCTYTG/CARAGGTCA-3
motif640	RFX5|CDGTTGCYAKGS|MA0510	RFX5	0	0	1	5-CTGTTGCCAGGG/CCCTGGCAACAG-3	5-CDGTTGCYAKGS/SCMTRGCAACHG-3
motif641	Nr5a2|AGNTCAAGGYCA|MA0505	NR5A2	0	0	1	5-AGTTCAAGGTCA/TGACCTTGAACT-3	5-AGNTCAAGGYCA/TGRCCTTGANCT-3
motif642	Nkx2_5(var.2)|NTTGAGTGSYN|MA0503	NKX2-5	0	0	1	5-CTTGAGTGGCT/AGCCACTCAAG-3	5-NTTGAGTGSYN/NRSCACTCAAN-3
motif643	Meis1|NNCTGTCASTC|MA0498	MEIS1	0	0	1	5-AGCTGTCACTC/GAGTGACAGCT-3	5-NNCTGTCASTC/GASTGACAGNN-3
motif644	MEF2C|NKCTATTTTTRG|MA0497	MEF2C	0	0	1	5-TTCTATTTTTAG/CTAAAAATAGAA-3	5-NKCTATTTTTRG/CYAAAAATAGMN-3
motif645	MAFK|NWWNTGCTGANTNNN|MA0496	MAFK	0	0	1	5-AAATTGCTGACTCAG/CTGAGTCAGCAATTT-3	5-NWWNTGCTGANTNNN/NNNANTCAGCANWWN-3
motif646	Nr1h3_Rxra|TGACCTNNAGTRACCY|MA0494	RXRA|NR1H3	0	0	1	5-TGACCTAAAGTAACCT/AGGTTACTTTAGGTCA-3	5-TGACCTNNAGTRACCY/RGGTYACTNNAGGTCA-3
motif647	Klf1|WGGGTGTGGY|MA0493	KLF1	0	0	1	5-TGGGTGTGGC/GCCACACCCA-3	5-WGGGTGTGGY/RCCACACCCW-3
motif648	JUND|ATGASTCAYH|MA0491	JUND	0	0	1	5-ATGAGTCACC/GGTGACTCAT-3	5-ATGASTCAYH/DRTGASTCAT-3
motif649	JUNB|MTGASTCAYN|MA0490	JUNB	0	0	1	5-ATGAGTCATC/GATGACTCAT-3	5-MTGASTCAYN/NRTGASTCAK-3
motif650	JUN(var.2)|NTGASTCAYY|MA0489	JUN	0	0	1	5-ATGAGTCATC/GATGACTCAT-3	5-NTGASTCAYY/RRTGASTCAN-3
motif651	JUN|ATKACATCATY|MA0488	JUN	0	0	1	5-ATGACATCATC/GATGATGTCAT-3	5-ATKACATCATY/RATGATGTMAT-3
motif654	FOXP1|TTTGTTTACHT|MA0481	FOXP1	0	0	1	5-TTTGTTTACTT/AAGTAAACAAA-3	5-TTTGTTTACHT/ADGTAAACAAA-3
motif655	Foxo1|DGTAAACARS|MA0480	FOXO1	0	1	1	5-TGTAAACAGG/CCTGTTTACA-3	5-DGTAAACARS/SYTGTTTACH-3
motif656	FOXH1|AATCCACA|MA0479	FOXH1	2	3	1	5-AATCCACA/TGTGGATT-3	5-AATCCACA/TGTGGATT-3
motif657	FOSL2|VTGASTCAYN|MA0478	FOSL2	0	0	1	5-ATGAGTCATC/GATGACTCAT-3	5-VTGASTCAYN/NRTGASTCAB-3
motif658	FOSL1|MTGASTCACY|MA0477	FOSL1	0	0	1	5-ATGAGTCACC/GGTGACTCAT-3	5-MTGASTCACY/RGTGASTCAK-3
motif659	FOS|ATGASTCASH|MA0476	FOS	0	0	1	5-ATGAGTCACA/TGTGACTCAT-3	5-ATGASTCASH/DSTGASTCAT-3
motif661	Erg|NNCTTCCTGY|MA0474	ERG	0	1	1	5-CACTTCCTGT/ACAGGAAGTG-3	5-NNCTTCCTGY/RCAGGAAGNN-3
motif662	ELF1|CACTTCCKGKTN|MA0473	ELF1	0	1	1	5-CACTTCCTGGTT/AACCAGGAAGTG-3	5-CACTTCCKGKTN/NAMCMGGAAGTG-3
motif663	E2F6|YYTCCCGCCN|MA0471	E2F6	0	0	1	5-CTTCCCGCCC/GGGCGGGAAG-3	5-YYTCCCGCCN/NGGCGGGARR-3
motif664	E2F4|YYTCCCGCC|MA0470	E2F4	0	0	1	5-CTTCCCGCC/GGCGGGAAG-3	5-YYTCCCGCC/GGCGGGARR-3
motif665	E2F3|YTCCCGCC|MA0469	E2F3	0	0	1	5-CTCCCGCC/GGCGGGAG-3	5-YTCCCGCC/GGCGGGAR-3
motif666	DUX4|TAAYYYAATCA|MA0468	DUX4	0	0	1	5-TAATTTAATCA/TGATTAAATTA-3	5-TAAYYYAATCA/TGATTRRRTTA-3
motif667	Crx|CTAATCCYCTT|MA0467	CRX	0	0	1	5-CTAATCCTCTT/AAGAGGATTAG-3	5-CTAATCCYCTT/AAGRGGATTAG-3
motif668	CEBPB|ATTGCAYMAY|MA0466	CEBPB	0	0	1	5-ATTGCACAAT/ATTGTGCAAT-3	5-ATTGCAYMAY/RTKRTGCAAT-3
motif669	CDX2|TTTTATKRCH|MA0465	CDX2	0	0	1	5-TTTTATGGCT/AGCCATAAAA-3	5-TTTTATKRCH/DGYMATAAAA-3
motif670	Bhlhe40|DGCACGTGWS|MA0464	BHLHE40	0	0	1	5-TGCACGTGAG/CTCACGTGCA-3	5-DGCACGTGWS/SWCACGTGCH-3
motif671	BATF_JUN|NNDATGASTCA|MA0462	JUN|BATF	0	0	1	5-GAAATGACTCA/TGAGTCATTTC-3	5-NNDATGASTCA/TGASTCATHNN-3
motif673	Stat6|TTCTNWRGAA|MA0520	STAT6	1	1	1	5-TTCTCAGGAA/TTCCTGAGAA-3	5-TTCTNWRGAA/TTCYWNAGAA-3
motif674	Tcf12|RRCAGCTG|MA0521	TCF12	1	1	1	5-AACAGCTG/CAGCTGTT-3	5-RRCAGCTG/CAGCTGYY-3
motif675	Tcf3|DGCAGCTGKN|MA0522	TCF3	0	0	1	5-TGCAGCTGTG/CACAGCTGCA-3	5-DGCAGCTGKN/NMCAGCTGCH-3
motif676	TFAP2C|NSCCTGRGGS|MA0524	TFAP2C	0	0	1	5-GCCCTGGGGC/GCCCCAGGGC-3	5-NSCCTGRGGS/SCCYCAGGSN-3
motif677	USF2|RGTCACRTG|MA0526	USF2	1	1	1	5-GGTCACATG/CATGTGACC-3	5-RGTCACRTG/CAYGTGACY-3
motif678	AR|ACANNNTGTTCYT|MA0007.2	AR	0	0	1	5-ACATTCTGTTCTT/AAGAACAGAATGT-3	5-ACANNNTGTTCYT/ARGAACANNNTGT-3
motif679	E2F1|BYTCSCGCCH|MA0024.2	E2F1	0	0	1	5-CCTCCCGCCC/GGGCGGGAGG-3	5-BYTCSCGCCH/DGGCGSGARV-3
motif682	Gata1|AGATAAGRN|MA0035.3	GATA1	1	1	1	5-AGATAAGAA/TTCTTATCT-3	5-AGATAAGRN/NYCTTATCT-3
motif684	MEF2A|KCTATTTTTRGM|MA0052.2	MEF2A	0	0	1	5-GCTATTTTTAGC/GCTAAAAATAGC-3	5-KCTATTTTTRGM/KCYAAAAATAGM-3
motif685	Myb|HAACTGYCA|MA0100.2	MYB	0	1	1	5-CAACTGCCA/TGGCAGTTG-3	5-HAACTGYCA/TGRCAGTTD-3
motif686	Myc|RNSCACRTGG|MA0147.2	MYC	0	1	1	5-AAGCACATGG/CCATGTGCTT-3	5-RNSCACRTGG/CCAYGTGSNY-3
motif687	Mycn|CACGTGG|MA0104.3	MYCN	0	1	1	5-CACGTGG/CCACGTG-3	5-CACGTGG/CCACGTG-3
motif688	NFKB1|KGGAAANYCCM|MA0105.3	RELA|RELB|REL|NFKB1|NFKB2	0	1	1	5-GGGAAATTCCC/GGGAATTTCCC-3	5-KGGAAANYCCM/KGGRNTTTCCM-3
motif689	NFYA|NNNSNKCTGATTGGYN|MA0060.2	NFYA	0	0	1	5-AGAGTGCTGATTGGTC/GACCAATCAGCACTCT-3	5-NNNSNKCTGATTGGYN/NRCCAATCAGMNSNNN-3
motif690	Sox2|VACAAWGG|MA0143.3	SOX2	0	1	1	5-AACAAAGG/CCTTTGTT-3	5-VACAAWGG/CCWTTGTB-3
motif691	SP1|GGGGGMGGGG|MA0079.3	SP1	0	0	1	5-GGGGGCGGGG/CCCCGCCCCC-3	5-GGGGGMGGGG/CCCCKCCCCC-3
motif692	STAT1|NTTCCYRGAA|MA0137.3	STAT1	0	0	1	5-TTTCCTGGAA/TTCCAGGAAA-3	5-NTTCCYRGAA/TTCYRGGAAN-3
motif693	STAT3|YTTCCNRGAA|MA0144.2	STAT3	0	0	1	5-TTTCCCAGAA/TTCTGGGAAA-3	5-YTTCCNRGAA/TTCYNGGAAR-3
motif694	TAL1_GATA1|TTATCWNNNNNNNNCAG|MA0140.2	GATA1|TAL1	0	0	1	5-TTATCTGTGAGGAGCAG/CTGCTCCTCACAGATAA-3	5-TTATCWNNNNNNNNCAG/CTGNNNNNNNNWGATAA-3
motif695	TFAP2A|TGCCCTSRGGC|MA0003.2	TFAP2A	0	0	1	5-TGCCCTGAGGC/GCCTCAGGGCA-3	5-TGCCCTSRGGC/GCCYSAGGGCA-3
motif696	USF1|GGTCACRTG|MA0093.2	USF1	0	0	1	5-GGTCACGTG/CACGTGACC-3	5-GGTCACRTG/CAYGTGACC-3
motif697	ZEB1|CWCACCTG|MA0103.2	ZEB1	0	1	1	5-CTCACCTG/CAGGTGAG-3	5-CWCACCTG/CAGGTGWG-3
motif698	ESRRA|CCAAGGTCAN|MA0592	ESRRA	0	0	1	5-CCAAGGTCAC/GTGACCTTGG-3	5-CCAAGGTCAN/NTGACCTTGG-3
motif700	Hoxa9|TGATTKATGGS|MA0594	HOXA9	0	0	1	5-TGATTTATGGC/GCCATAAATCA-3	5-TGATTKATGGS/SCCATMAATCA-3
motif703	EHF|MCTTCCTS|MA0598	EHF	1	2	1	5-CCTTCCTG/CAGGAAGG-3	5-MCTTCCTS/SAGGAAGK-3
motif704	KLF5|DGGGHGGGGC|MA0599	KLF5	0	0	1	5-GGGGCGGGGC/GCCCCGCCCC-3	5-DGGGHGGGGC/GCCCCDCCCH-3
motif705	NR3C1|RGDACABNBTGTNCY|MA0113.2	NR3C1	0	0	1	5-AGAACATTCTGTTCT/AGAACAGAATGTTCT-3	5-RGDACABNBTGTNCY/RGNACAVNVTGTHCY-3
motif706	BCL6B|KKAATTCCTAGAAAGCA	BCL6B	0	0	1	5-TGAATTCCTAGAAAGCA/TGCTTTCTAGGAATTCA-3	5-KKAATTCCTAGAAAGCA/TGCTTTCTAGGAATTMM-3
motif707	CTCF|ACCRCTAGRKGGCGCW	CTCF	0	0	1	5-ACCACTAGGTGGCGCT/AGCGCCACCTAGTGGT-3	5-ACCRCTAGRKGGCGCW/WGCGCCMYCTAGYGGT-3
motif708	EGR1_2|TGCGTGGGCGT	EGR1	0	0	1	5-TGCGTGGGCGT/ACGCCCACGCA-3	5-TGCGTGGGCGT/ACGCCCACGCA-3
motif709	GLI2|NTGKGTGGTC	GLI2	0	0	1	5-GTGGGTGGTC/GACCACCCAC-3	5-NTGKGTGGTC/GACCACMCAN-3
motif710	GLI2_2|YAGNGTGGTCGC	GLI2	0	0	1	5-CAGTGTGGTCGC/GCGACCACACTG-3	5-YAGNGTGGTCGC/GCGACCACNCTR-3
motif711	GLIS1|CWTCGTGGGGGGTCK	GLIS1	0	0	1	5-CTTCGTGGGGGGTCT/AGACCCCCCACGAAG-3	5-CWTCGTGGGGGGTCK/MGACCCCCCACGAWG-3
motif713	HINFP1|RCGTCCGC	HINFP	0	0	1	5-ACGTCCGC/GCGGACGT-3	5-RCGTCCGC/GCGGACGY-3
motif714	HINFP1_2|GCGGACGNTGCRACGTCCGC	HINFP	0	0	1	5-GCGGACGTTGCAACGTCCGC/GCGGACGTTGCAACGTCCGC-3	5-GCGGACGNTGCRACGTCCGC/GCGGACGTYGCANCGTCCGC-3
motif715	HINFP1_3|GCGGACGNTSARCGTCCGC	HINFP	0	0	1	5-GCGGACGTTCAACGTCCGC/GCGGACGTTGAACGTCCGC-3	5-GCGGACGNTSARCGTCCGC/GCGGACGYTSANCGTCCGC-3
motif716	Hic1|RTGCCARCCYRTGCCA	HIC1	0	0	1	5-GTGCCAGCCTATGCCA/TGGCATAGGCTGGCAC-3	5-RTGCCARCCYRTGCCA/TGGCAYRGGYTGGCAY-3
motif718	KLF13|NANAARGGGGCGTGKCH	KLF13	0	0	1	5-CAAAAAGGGGCGTGGCA/TGCCACGCCCCTTTTTG-3	5-NANAARGGGGCGTGKCH/DGMCACGCCCCYTTNTN-3
motif719	KLF16|NMCACGCCCCC	KLF16	0	0	1	5-GCCACGCCCCC/GGGGGCGTGGC-3	5-NMCACGCCCCC/GGGGGCGTGKN-3
motif720	Klf12|WGGGCGTGGYC	KLF12	0	0	1	5-AGGGCGTGGTC/GACCACGCCCT-3	5-WGGGCGTGGYC/GRCCACGCCCW-3
motif721	PRDM1|RAAAGTGAAAGT	PRDM1	0	0	1	5-GAAAGTGAAAGT/ACTTTCACTTTC-3	5-RAAAGTGAAAGT/ACTTTCACTTTY-3
motif722	SCRT2|RWGCAACAGGTG	SCRT2	0	0	1	5-ATGCAACAGGTG/CACCTGTTGCAT-3	5-RWGCAACAGGTG/CACCTGTTGCWY-3
motif723	SNAI2|RCAGGTG	SNAI2	1	1	1	5-ACAGGTG/CACCTGT-3	5-RCAGGTG/CACCTGY-3
motif724	SP1|RCCMCDCCCMN	SP1	0	0	1	5-ACCCCGCCCCC/GGGGGCGGGGT-3	5-RCCMCDCCCMN/NKGGGHGKGGY-3
motif725	SP3|GKGGGCGTGG	SP3	0	0	1	5-GGGGGCGTGG/CCACGCCCCC-3	5-GKGGGCGTGG/CCACGCCCMC-3
motif726	SP4|WRGCCACGCCCMCTN	SP4	0	0	1	5-AAGCCACGCCCCCTT/AAGGGGGCGTGGCTT-3	5-WRGCCACGCCCMCTN/NAGKGGGCGTGGCYW-3
motif727	YY1|AATGGCG	YY1	1	1	1	5-AATGGCG/CGCCATT-3	5-AATGGCG/CGCCATT-3
motif728	YY2|WAATGGCGG	YY2	0	0	1	5-TAATGGCGG/CCGCCATTA-3	5-WAATGGCGG/CCGCCATTW-3
motif729	YY2_2|RNNATGGCGG	YY2	0	1	1	5-AAAATGGCGG/CCGCCATTTT-3	5-RNNATGGCGG/CCGCCATNNY-3
motif730	ZBED1|YATGTCGCGAYAN	ZBED1	0	0	1	5-TATGTCGCGATAG/CTATCGCGACATA-3	5-YATGTCGCGAYAN/NTRTCGCGACATR-3
motif731	ZBTB7A|GGTGGTCGC	ZBTB7A	0	0	1	5-GGTGGTCGC/GCGACCACC-3	5-GGTGGTCGC/GCGACCACC-3
motif732	ZBTB7B|NTNGGKGGTCG	ZBTB7B	0	0	1	5-TTCGGTGGTCG/CGACCACCGAA-3	5-NTNGGKGGTCG/CGACCMCCNAN-3
motif733	ZBTB7C|CGACCACCN	ZBTB7C	0	0	1	5-CGACCACCG/CGGTGGTCG-3	5-CGACCACCN/NGGTGGTCG-3
motif734	ZIC1|CACAGCRGGGGGTC	ZIC1	0	0	1	5-CACAGCGGGGGGTC/GACCCCCCGCTGTG-3	5-CACAGCRGGGGGTC/GACCCCCYGCTGTG-3
motif735	ZIC4|NACCCCCYGC	ZIC4	0	0	1	5-GACCCCCCGC/GCGGGGGGTC-3	5-NACCCCCYGC/GCRGGGGGTN-3
motif736	ZNF143|TWCCCAYAATGCAYYG	ZNF143	0	0	1	5-TACCCACAATGCATTG/CAATGCATTGTGGGTA-3	5-TWCCCAYAATGCAYYG/CRRTGCATTRTGGGWA-3
motif737	ZNF238|MACATCTGGAW	ZBTB18	0	0	1	5-AACATCTGGAT/ATCCAGATGTT-3	5-MACATCTGGAW/WTCCAGATGTK-3
motif738	ZNF306|TCGAGGYTAGMCCA	ZKSCAN3	0	0	1	5-TCGAGGCTAGACCA/TGGTCTAGCCTCGA-3	5-TCGAGGYTAGMCCA/TGGKCTARCCTCGA-3
motif739	ZNF410|GANTATTATGGGATGK	ZNF410	0	0	1	5-GAGTATTATGGGATGG/CCATCCCATAATACTC-3	5-GANTATTATGGGATGK/MCATCCCATAATANTC-3
motif740	ZNF524|ACCCTYGAACCC	ZNF524	0	0	1	5-ACCCTCGAACCC/GGGTTCGAGGGT-3	5-ACCCTYGAACCC/GGGTTCRAGGGT-3
motif742	ZNF740_2|GTGGGGGGGG	ZNF740	0	0	1	5-GTGGGGGGGG/CCCCCCCCAC-3	5-GTGGGGGGGG/CCCCCCCCAC-3
motif743	ZNF75A|GCTTTTCCCACA	ZNF75A	0	0	1	5-GCTTTTCCCACA/TGTGGGAAAAGC-3	5-GCTTTTCCCACA/TGTGGGAAAAGC-3
motif744	ZNF784|GTACCTACCT	ZNF784	0	0	1	5-GTACCTACCT/AGGTAGGTAC-3	5-GTACCTACCT/AGGTAGGTAC-3
motif745	ZSCAN4|TTTTCAGBGTGTGCA	ZSCAN4	0	0	1	5-TTTTCAGTGTGTGCA/TGCACACACTGAAAA-3	5-TTTTCAGBGTGTGCA/TGCACACVCTGAAAA-3
motif746	Zfp652|WTTAACCCTTTV	ZNF652	0	0	1	5-ATTAACCCTTTC/GAAAGGGTTAAT-3	5-WTTAACCCTTTV/BAAAGGGTTAAW-3
motif747	Zfp740|NTGGGGGGG	ZNF740	0	0	1	5-GTGGGGGGG/CCCCCCCAC-3	5-NTGGGGGGG/CCCCCCCAN-3
motif748	CENPB|TTCGNWNNANGCGGG	CENPB	0	0	1	5-TTCGTTGTATGCGGG/CCCGCATACAACGAA-3	5-TTCGNWNNANGCGGG/CCCGCNTNNWNCGAA-3
motif749	GRHL1|AACCGGTNNNACCGGTT	GRHL1	0	0	1	5-AACCGGTTAAACCGGTT/AACCGGTTTAACCGGTT-3	5-AACCGGTNNNACCGGTT/AACCGGTNNNACCGGTT-3
motif750	GRHL1_2|AAACCGGTTY	GRHL1	0	0	1	5-AAACCGGTTT/AAACCGGTTT-3	5-AAACCGGTTY/RAACCGGTTT-3
motif751	GRHL1_3|NAAACCGGTTT	GRHL1	0	0	1	5-AAAACCGGTTT/AAACCGGTTTT-3	5-NAAACCGGTTT/AAACCGGTTTN-3
motif752	TFCP2_2|ACCRGTTNNAWCCGGT	TFCP2	0	0	1	5-ACCGGTTTAAACCGGT/ACCGGTTTAAACCGGT-3	5-ACCRGTTNNAWCCGGT/ACCGGWTNNAACYGGT-3
motif753	CUX1|ATYGATYNNNNATYGAT	CUX1	0	0	1	5-ATCGATCAGTTATCGAT/ATCGATAACTGATCGAT-3	5-ATYGATYNNNNATYGAT/ATCRATNNNNRATCRAT-3
motif755	CUX2|ATCRATANNNWTATCGAT	CUX2	0	0	1	5-ATCGATAAAATTATCGAT/ATCGATAATTTTATCGAT-3	5-ATCRATANNNWTATCGAT/ATCGATAWNNNTATYGAT-3
motif756	CUX2_2|TNATCGATA	CUX2	0	0	1	5-TAATCGATA/TATCGATTA-3	5-TNATCGATA/TATCGATNA-3
motif757	ONECUT1_2|TATYGATTTTN	ONECUT1	0	0	1	5-TATCGATTTTT/AAAAATCGATA-3	5-TATYGATTTTN/NAAAATCRATA-3
motif758	ONECUT3|AAAAATCRATAA	ONECUT3	0	0	1	5-AAAAATCAATAA/TTATTGATTTTT-3	5-AAAAATCRATAA/TTATYGATTTTT-3
motif759	E2F7|WTTTGGCGGGAAAN	E2F7	0	0	1	5-TTTTGGCGGGAAAA/TTTTCCCGCCAAAA-3	5-WTTTGGCGGGAAAN/NTTTCCCGCCAAAW-3
motif760	ELF3|TACTTCCGGGT	ELF3	0	0	1	5-TACTTCCGGGT/ACCCGGAAGTA-3	5-TACTTCCGGGT/ACCCGGAAGTA-3
motif762	ELK1_3|ACTTCCGSCGGAAGY	ELK1	0	0	1	5-ACTTCCGGCGGAAGT/ACTTCCGCCGGAAGT-3	5-ACTTCCGSCGGAAGY/RCTTCCGSCGGAAGT-3
motif763	ETS1_4|CCGGAAGTACWTCCGGC	ETS1	0	0	1	5-CCGGAAGTACATCCGGC/GCCGGATGTACTTCCGG-3	5-CCGGAAGTACWTCCGGC/GCCGGAWGTACTTCCGG-3
motif764	ETV2|ATTTCCGGTN	ETV2	0	0	1	5-ATTTCCGGTT/AACCGGAAAT-3	5-ATTTCCGGTN/NACCGGAAAT-3
motif765	ETV4|ACWTCCGGT	ETV4	0	0	1	5-ACTTCCGGT/ACCGGAAGT-3	5-ACWTCCGGT/ACCGGAWGT-3
motif766	ETV5|NCWTCCGG	ETV5	0	1	1	5-ACTTCCGG/CCGGAAGT-3	5-NCWTCCGG/CCGGAWGN-3
motif767	ETV6|YRCTTCCGSTTCCGG	ETV6	0	0	1	5-CACTTCCGCTTCCGG/CCGGAAGCGGAAGTG-3	5-YRCTTCCGSTTCCGG/CCGGAASCGGAAGYR-3
motif768	ETV6_2|YACTTCCGS	ETV6	0	0	1	5-CACTTCCGC/GCGGAAGTG-3	5-YACTTCCGS/SCGGAAGTR-3
motif769	FLI1_4|ACCGGAWATCCGGT	FLI1	0	0	1	5-ACCGGAAATCCGGT/ACCGGATTTCCGGT-3	5-ACCGGAWATCCGGT/ACCGGATWTCCGGT-3
motif770	SPDEF_3|KTWTACTTCTTWCTGN	SPDEF	0	0	1	5-GTATACTTCTTACTGC/GCAGTAAGAAGTATAC-3	5-KTWTACTTCTTWCTGN/NCAGWAAGAAGTAWAM-3
motif771	SPDEF_4|ACATCCGGKT	SPDEF	0	0	1	5-ACATCCGGGT/ACCCGGATGT-3	5-ACATCCGGKT/AMCCGGATGT-3
motif772	SPDEF_5|ATRATCCGGGACCAC	SPDEF	0	0	1	5-ATGATCCGGGACCAC/GTGGTCCCGGATCAT-3	5-ATRATCCGGGACCAC/GTGGTCCCGGATYAT-3
motif773	SPI1|AAAAAGCGGAAGTN	SPI1	0	0	1	5-AAAAAGCGGAAGTA/TACTTCCGCTTTTT-3	5-AAAAAGCGGAAGTN/NACTTCCGCTTTTT-3
motif777	GCM1|ATGCGGGTA	GCM1	0	0	1	5-ATGCGGGTA/TACCCGCAT-3	5-ATGCGGGTA/TACCCGCAT-3
motif778	GCM1_2|ATRCKGGTRCCMGCA	GCM1	0	0	1	5-ATGCGGGTACCCGCA/TGCGGGTACCCGCAT-3	5-ATRCKGGTRCCMGCA/TGCKGGYACCMGYAT-3
motif779	GCM1_3|ATGCGGGTAC	GCM1	0	0	1	5-ATGCGGGTAC/GTACCCGCAT-3	5-ATGCGGGTAC/GTACCCGCAT-3
motif780	GCM2|ATGCGGGT	GCM2	0	0	1	5-ATGCGGGT/ACCCGCAT-3	5-ATGCGGGT/ACCCGCAT-3
motif782	Tcf7|AAAGATCAAAGG	TCF7	0	0	1	5-AAAGATCAAAGG/CCTTTGATCTTT-3	5-AAAGATCAAAGG/CCTTTGATCTTT-3
motif783	HOMEZ|TWTAATCGTTTT	HOMEZ	0	0	1	5-TATAATCGTTTT/AAAACGATTATA-3	5-TWTAATCGTTTT/AAAACGATTAWA-3
motif784	HSF1_2|TTCTAGAAYRTTC	HSF1	0	0	1	5-TTCTAGAACGTTC/GAACGTTCTAGAA-3	5-TTCTAGAAYRTTC/GAAYRTTCTAGAA-3
motif785	HSFY2|TTCGAAMNRTTCGAA	HSFY2	0	0	1	5-TTCGAAACGTTCGAA/TTCGAACGTTTCGAA-3	5-TTCGAAMNRTTCGAA/TTCGAAYNKTTCGAA-3
motif786	HSFY2_2|NTTCGAACG	HSFY2	0	0	1	5-TTTCGAACG/CGTTCGAAA-3	5-NTTCGAACG/CGTTCGAAN-3
motif787	IRF5_2|NRGTTTCGGT	IRF5	0	0	1	5-TGGTTTCGGT/ACCGAAACCA-3	5-NRGTTTCGGT/ACCGAAACYN-3
motif788	IRF7|TTTCRNTTTCG	IRF7	0	0	1	5-TTTCGCTTTCG/CGAAAGCGAAA-3	5-TTTCRNTTTCG/CGAAANYGAAA-3
motif789	IRF7_2|RAANCGAAAWTCGNTTY	IRF7	0	0	1	5-AAAACGAAAATCGATTT/AAATCGATTTTCGTTTT-3	5-RAANCGAAAWTCGNTTY/RAANCGAWTTTCGNTTY-3
motif790	IRF9|AACGAAACCGAAACY	IRF9	0	0	1	5-AACGAAACCGAAACT/AGTTTCGGTTTCGTT-3	5-AACGAAACCGAAACY/RGTTTCGGTTTCGTT-3
motif791	MEF2D|DCTAWAAATAGM	MEF2D	0	1	1	5-ACTATAAATAGA/TCTATTTATAGT-3	5-DCTAWAAATAGM/KCTATTTWTAGH-3
motif792	SRF|ACCATATAWGG	SRF	0	0	1	5-ACCATATATGG/CCATATATGGT-3	5-ACCATATAWGG/CCWTATATGGT-3
motif797	TGIF1|TGACAGCTGTCA	TGIF1	0	0	1	5-TGACAGCTGTCA/TGACAGCTGTCA-3	5-TGACAGCTGTCA/TGACAGCTGTCA-3
motif798	MYBL1|CVGTTTAACGGT	MYBL1	0	0	1	5-CCGTTTAACGGT/ACCGTTAAACGG-3	5-CVGTTTAACGGT/ACCGTTAAACBG-3
motif799	MYBL1_2|RCSGTTAACGGT	MYBL1	0	0	1	5-ACCGTTAACGGT/ACCGTTAACGGT-3	5-RCSGTTAACGGT/ACCGTTAACSGY-3
motif800	MYBL2_2|TAACGGTTYTAACGGY	MYBL2	0	0	1	5-TAACGGTTTTAACGGT/ACCGTTAAAACCGTTA-3	5-TAACGGTTYTAACGGY/RCCGTTARAACCGTTA-3
motif801	MYBL2_3|TAACGGTT	MYBL2	0	0	1	5-TAACGGTT/AACCGTTA-3	5-TAACGGTT/AACCGTTA-3
motif802	MYBL2_4|RNCCGTTAAACSGNY	MYBL2	0	0	1	5-AACCGTTAAACGGTC/GACCGTTTAACGGTT-3	5-RNCCGTTAAACSGNY/RNCSGTTTAACGGNY-3
motif803	NFAT5|NGTAATTTTCCAY	NFAT5	0	0	1	5-TGTAATTTTCCAT/ATGGAAAATTACA-3	5-NGTAATTTTCCAY/RTGGAAAATTACN-3
motif804	NFATC1|RTGGAAANWWNNTTTYCM	NFATC1	0	0	1	5-ATGGAAAATTATTTTCCC/GGGAAAATAATTTTCCAT-3	5-RTGGAAANWWNNTTTYCM/KGRAAANNWWNTTTCCAY-3
motif805	NFATC1_2|TTTCCAYWRTGGAAA	NFATC1	0	0	1	5-TTTCCATTATGGAAA/TTTCCATAATGGAAA-3	5-TTTCCAYWRTGGAAA/TTTCCAYWRTGGAAA-3
motif806	NFATC1_3|TTTCCATGGAAA	NFATC1	0	0	1	5-TTTCCATGGAAA/TTTCCATGGAAA-3	5-TTTCCATGGAAA/TTTCCATGGAAA-3
motif807	NFKB1|AGGGGAWTCCCCT	RELA|RELB|REL|NFKB1|NFKB2	0	0	1	5-AGGGGAATCCCCT/AGGGGATTCCCCT-3	5-AGGGGAWTCCCCT/AGGGGAWTCCCCT-3
motif808	NFIB|TTGGCANNNTGCCAR	NFIB	0	0	1	5-TTGGCACAGTGCCAG/CTGGCACTGTGCCAA-3	5-TTGGCANNNTGCCAR/YTGGCANNNTGCCAA-3
motif809	NRF1|YGCGCATGCGC	NRF1	0	0	1	5-TGCGCATGCGC/GCGCATGCGCA-3	5-YGCGCATGCGC/GCGCATGCGCR-3
motif811	PAX4_2|NTAATTAG	PAX4	0	0	1	5-CTAATTAG/CTAATTAG-3	5-NTAATTAG/CTAATTAN-3
motif812	PAX7_2|TAATYGATTA	PAX7	0	0	1	5-TAATCGATTA/TAATCGATTA-3	5-TAATYGATTA/TAATCRATTA-3
motif813	PAX9|KCANTCAWGCGTGACG	PAX9	0	0	1	5-GCAGTCATGCGTGACG/CGTCACGCATGACTGC-3	5-KCANTCAWGCGTGACG/CGTCACGCWTGANTGM-3
motif814	POU1F1_2|AWTATGCWAATKAN	POU1F1	0	0	1	5-AATATGCAAATTAG/CTAATTTGCATATT-3	5-AWTATGCWAATKAN/NTMATTWGCATAWT-3
motif815	POU3F1_2|AWTTATKCAN	POU3F1	1	2	1	5-AATTATGCAT/ATGCATAATT-3	5-AWTTATKCAN/NTGMATAAWT-3
motif816	POU3F2_2|WTATGCWAATNN	POU3F2	0	0	1	5-TTATGCAAATTA/TAATTTGCATAA-3	5-WTATGCWAATNN/NNATTWGCATAW-3
motif817	POU3F4_2|TAAWTTATGCA	POU3F4	0	0	1	5-TAATTTATGCA/TGCATAAATTA-3	5-TAAWTTATGCA/TGCATAAWTTA-3
motif818	POU4F2_2|TGMATAATTAATKAG	POU4F2	0	0	1	5-TGCATAATTAATGAG/CTCATTAATTATGCA-3	5-TGMATAATTAATKAG/CTMATTAATTATKCA-3
motif819	POU6F2|WTAATKAGNT	POU6F2	1	1	1	5-ATAATGAGCT/AGCTCATTAT-3	5-WTAATKAGNT/ANCTMATTAW-3
motif820	POU6F2_2|NTAATKAGCTMATTA	POU6F2	0	0	1	5-TTAATTAGCTCATTA/TAATGAGCTAATTAA-3	5-NTAATKAGCTMATTA/TAATKAGCTMATTAN-3
motif821	POU6F2_3|TAATTAGC	POU6F2	1	1	1	5-TAATTAGC/GCTAATTA-3	5-TAATTAGC/GCTAATTA-3
motif822	Pou2f2|TWTGMATATTCANN	POU2F2	0	0	1	5-TTTGAATATTCATA/TATGAATATTCAAA-3	5-TWTGMATATTCANN/NNTGAATATKCAWA-3
motif823	Pou2f2_2|ATTTGCATA	POU2F2	1	1	1	5-ATTTGCATA/TATGCAAAT-3	5-ATTTGCATA/TATGCAAAT-3
motif824	PROX1|TAAGRCGTCTTR	PROX1	0	0	1	5-TAAGGCGTCTTG/CAAGACGCCTTA-3	5-TAAGRCGTCTTR/YAAGACGYCTTA-3
motif825	RFX2_2|CGTTGCTARGCAACS	RFX2	0	0	1	5-CGTTGCTAGGCAACG/CGTTGCCTAGCAACG-3	5-CGTTGCTARGCAACS/SGTTGCYTAGCAACG-3
motif826	Rfx3|CGTTRCCATGGCAACS	RFX3	0	0	1	5-CGTTGCCATGGCAACC/GGTTGCCATGGCAACG-3	5-CGTTRCCATGGCAACS/SGTTGCCATGGYAACG-3
motif827	RUNX2_2|TGYGGTTWNTGCGGTY	RUNX2	0	0	1	5-TGCGGTTTTTGCGGTT/AACCGCAAAAACCGCA-3	5-TGYGGTTWNTGCGGTY/RACCGCANWAACCRCA-3
motif829	RUNX3|NACCGCAAACCGCA	RUNX3	0	0	1	5-AACCGCAAACCGCA/TGCGGTTTGCGGTT-3	5-NACCGCAAACCGCA/TGCGGTTTGCGGTN-3
motif830	RUNX3_4|NTTGYGGTTN	RUNX3	0	1	1	5-TTTGCGGTTT/AAACCGCAAA-3	5-NTTGYGGTTN/NAACCRCAAN-3
motif831	GMEB2|TNACGYAM	GMEB2	0	0	1	5-TTACGTAC/GTACGTAA-3	5-TNACGYAM/KTRCGTNA-3
motif832	GMEB2_2|WRCGTAACCACGTW	GMEB2	0	0	1	5-AACGTAACCACGTA/TACGTGGTTACGTT-3	5-WRCGTAACCACGTW/WACGTGGTTACGYW-3
motif833	GMEB2_3|TACGTAACNBACGTA	GMEB2	0	0	1	5-TACGTAACTGACGTA/TACGTCAGTTACGTA-3	5-TACGTAACNBACGTA/TACGTVNGTTACGTA-3
motif834	EOMES_2|TNACACNTNNNRANGTGTGA	EOMES	0	0	1	5-TCACACCTTCTAAGGTGTGA/TCACACCTTAGAAGGTGTGA-3	5-TNACACNTNNNRANGTGTGA/TCACACNTYNNNANGTGTNA-3
motif835	MGA_3|GGTGTGAANWTTCACACN	MGA	0	0	1	5-GGTGTGAAATTTCACACC/GGTGTGAAATTTCACACC-3	5-GGTGTGAANWTTCACACN/NGTGTGAAWNTTCACACC-3
motif836	TBX15_2|TCACACCT	TBX15	0	0	1	5-TCACACCT/AGGTGTGA-3	5-TCACACCT/AGGTGTGA-3
motif837	TBX1|TCACACCTTTTTTCACACCT	TBX1	0	0	1	5-TCACACCTTTTTTCACACCT/AGGTGTGAAAAAAGGTGTGA-3	5-TCACACCTTTTTTCACACCT/AGGTGTGAAAAAAGGTGTGA-3
motif838	TBX1_4|TTTCACACCTYWRAGGTGTGARA	TBX1	0	0	1	5-TTTCACACCTCAGAGGTGTGAGA/TCTCACACCTCTGAGGTGTGAAA-3	5-TTTCACACCTYWRAGGTGTGARA/TYTCACACCTYWRAGGTGTGAAA-3
motif839	TBX1_5|TTCACACCTMHAGGTGTGAR	TBX1	0	0	1	5-TTCACACCTCTAGGTGTGAA/TTCACACCTAGAGGTGTGAA-3	5-TTCACACCTMHAGGTGTGAR/YTCACACCTDKAGGTGTGAA-3
motif840	TBX21_4|GGTGTGATATCACACC	TBX21	0	0	1	5-GGTGTGATATCACACC/GGTGTGATATCACACC-3	5-GGTGTGATATCACACC/GGTGTGATATCACACC-3
motif841	TBX21_5|TTCACACCTN	TBX21	0	0	1	5-TTCACACCTT/AAGGTGTGAA-3	5-TTCACACCTN/NAGGTGTGAA-3
motif842	TBX5|TNACACCT	TBX5	0	0	1	5-TCACACCT/AGGTGTGA-3	5-TNACACCT/AGGTGTNA-3
motif843	T|TCACACNTANGTGTGA	T	0	0	1	5-TCACACCTAGGTGTGA/TCACACCTAGGTGTGA-3	5-TCACACNTANGTGTGA/TCACACNTANGTGTGA-3
motif844	TEAD1_2|RCATTCCWNRCATTCC	TEAD1	0	0	1	5-ACATTCCTGACATTCC/GGAATGTCAGGAATGT-3	5-RCATTCCWNRCATTCC/GGAATGYNWGGAATGY-3
motif845	TFAP2B_2|GCCTSAGGC	TFAP2B	0	0	1	5-GCCTGAGGC/GCCTCAGGC-3	5-GCCTSAGGC/GCCTSAGGC-3
motif846	TFAP2B_3|TGCCCYKRGGGCA	TFAP2B	0	0	1	5-TGCCCTGAGGGCA/TGCCCTCAGGGCA-3	5-TGCCCYKRGGGCA/TGCCCYMRGGGCA-3
motif847	TFAP2C_3|TGCCCYSRGGGCA	TFAP2C	0	0	1	5-TGCCCTGAGGGCA/TGCCCTCAGGGCA-3	5-TGCCCYSRGGGCA/TGCCCYSRGGGCA-3
motif848	Tcfap2a|NGCCYKRGGGCA	TFAP2A	0	0	1	5-TGCCCGGGGGCA/TGCCCCCGGGCA-3	5-NGCCYKRGGGCA/TGCCCYMRGGCN-3
motif849	ARNTL|GTCACGTGAC	ARNTL	0	0	1	5-GTCACGTGAC/GTCACGTGAC-3	5-GTCACGTGAC/GTCACGTGAC-3
motif850	Ascl2|ARCAGCTGCN	ASCL2	0	0	1	5-AGCAGCTGCT/AGCAGCTGCT-3	5-ARCAGCTGCN/NGCAGCTGYT-3
motif851	Atoh1|RMCATATGKY	ATOH1	0	0	1	5-AACATATGTT/AACATATGTT-3	5-RMCATATGKY/RMCATATGKY-3
motif852	BHLHB3|KCACGTGMC	BHLHE41	0	0	1	5-GCACGTGAC/GTCACGTGC-3	5-KCACGTGMC/GKCACGTGM-3
motif853	Bhlhb2|KCACGTGM	BHLHE40	0	0	1	5-TCACGTGA/TCACGTGA-3	5-KCACGTGM/KCACGTGM-3
motif854	CLOCK|NACACGTGT	CLOCK	0	0	1	5-AACACGTGT/ACACGTGTT-3	5-NACACGTGT/ACACGTGTN-3
motif855	FIGLA|MCAGGTG	FIGLA	1	2	1	5-ACAGGTG/CACCTGT-3	5-MCAGGTG/CACCTGK-3
motif856	HES7|YGGCACGTGCCR	HES7	0	0	1	5-TGGCACGTGCCA/TGGCACGTGCCA-3	5-YGGCACGTGCCR/YGGCACGTGCCR-3
motif857	HEY1|NRCACGTGNC	HEY1	0	0	1	5-GACACGTGCC/GGCACGTGTC-3	5-NRCACGTGNC/GNCACGTGYN-3
motif858	HEY2|CACGTGCC	HEY2	0	0	1	5-CACGTGCC/GGCACGTG-3	5-CACGTGCC/GGCACGTG-3
motif859	HEY2_2|RCACGTG	HEY2	0	0	1	5-GCACGTG/CACGTGC-3	5-RCACGTG/CACGTGY-3
motif860	ID4|RCACCTGY	ID4	0	1	1	5-ACACCTGT/ACAGGTGT-3	5-RCACCTGY/RCAGGTGY-3
motif861	MAX|CACGTGKNKRNCACGTG	MAX	0	0	1	5-CACGTGGTTAGCACGTG/CACGTGCTAACCACGTG-3	5-CACGTGKNKRNCACGTG/CACGTGNYMNMCACGTG-3
motif862	MLXIPL|NNCACGTGAY	MLXIPL	0	0	1	5-ATCACGTGAT/ATCACGTGAT-3	5-NNCACGTGAY/RTCACGTGNN-3
motif863	MYF6|AACARCTGTT	MYF6	0	0	1	5-AACAGCTGTT/AACAGCTGTT-3	5-AACARCTGTT/AACAGYTGTT-3
motif864	NEUROD2|RVCATATGKY	NEUROD2	0	0	1	5-ACCATATGGC/GCCATATGGT-3	5-RVCATATGKY/RMCATATGBY-3
motif865	NEUROG2_2|RACATATGTC	NEUROG2	0	0	1	5-AACATATGTC/GACATATGTT-3	5-RACATATGTC/GACATATGTY-3
motif866	NHLH1|CGCAGCTGCN	NHLH1	0	0	1	5-CGCAGCTGCG/CGCAGCTGCG-3	5-CGCAGCTGCN/NGCAGCTGCG-3
motif867	NHLH1_2|MGCAGCTGCG	NHLH1	0	0	1	5-CGCAGCTGCG/CGCAGCTGCG-3	5-MGCAGCTGCG/CGCAGCTGCK-3
motif868	OLIG1|AMCATATGKT	OLIG1	0	0	1	5-AACATATGTT/AACATATGTT-3	5-AMCATATGKT/AMCATATGKT-3
motif869	TCF4|RCACCTGB	TCF4	0	1	1	5-GCACCTGC/GCAGGTGC-3	5-RCACCTGB/VCAGGTGY-3
motif871	TFE3|NTCACGTG	TFE3	0	1	1	5-GTCACGTG/CACGTGAC-3	5-NTCACGTG/CACGTGAN-3
motif872	TFEB|GTCACGTG	TFEB	0	1	1	5-GTCACGTG/CACGTGAC-3	5-GTCACGTG/CACGTGAC-3
motif873	USF1|RTCACGTG	USF1	0	1	1	5-GTCACGTG/CACGTGAC-3	5-RTCACGTG/CACGTGAY-3
motif874	ATF4|KATTGCRTCAT	ATF4	0	0	1	5-TATTGCATCAT/ATGATGCAATA-3	5-KATTGCRTCAT/ATGAYGCAATM-3
motif875	Atf4|KATTGCRTCATCCT	ATF4	0	0	1	5-GATTGCATCATCCT/AGGATGATGCAATC-3	5-KATTGCRTCATCCT/AGGATGAYGCAATM-3
motif876	BATF3|TGATGACGTCATCA	BATF3	0	0	1	5-TGATGACGTCATCA/TGATGACGTCATCA-3	5-TGATGACGTCATCA/TGATGACGTCATCA-3
motif877	CEBPG|ATTRCGCAAY	CEBPG	0	0	1	5-ATTGCGCAAT/ATTGCGCAAT-3	5-ATTRCGCAAY/RTTGCGYAAT-3
motif878	CREB3L1_3|TGCCACGTGGCA	CREB3L1	0	0	1	5-TGCCACGTGGCA/TGCCACGTGGCA-3	5-TGCCACGTGGCA/TGCCACGTGGCA-3
motif879	Creb3l2|TGATGACGTGGCA	CREB3L2	0	0	1	5-TGATGACGTGGCA/TGCCACGTCATCA-3	5-TGATGACGTGGCA/TGCCACGTCATCA-3
motif880	Dbp|RTTACGTAAY	DBP	0	0	1	5-ATTACGTAAC/GTTACGTAAT-3	5-RTTACGTAAY/RTTACGTAAY-3
motif881	Jdp2|ATGASTCAT	JDP2	0	0	1	5-ATGACTCAT/ATGAGTCAT-3	5-ATGASTCAT/ATGASTCAT-3
motif882	MAFK|WWWNTGCTGAN	MAFK	1	1	1	5-AATTTGCTGAC/GTCAGCAAATT-3	5-WWWNTGCTGAN/NTCAGCANWWW-3
motif883	Mafb|AAWNTGCTGAC	MAFB	0	0	1	5-AAAATGCTGAC/GTCAGCATTTT-3	5-AAWNTGCTGAC/GTCAGCANWTT-3
motif886	TEF_2|TTAYGTAA	TEF	1	1	1	5-TTATGTAA/TTACATAA-3	5-TTAYGTAA/TTACRTAA-3
motif887	FOXB1|GAATGACACRGCGA	FOXB1	0	0	1	5-GAATGACACAGCGA/TCGCTGTGTCATTC-3	5-GAATGACACRGCGA/TCGCYGTGTCATTC-3
motif888	FOXB1_3|ATRTTTACATW	FOXB1	0	0	1	5-ATATTTACATA/TATGTAAATAT-3	5-ATRTTTACATW/WATGTAAAYAT-3
motif891	FOXG1|RTAAACAATDGTAAACA	FOXG1	0	0	1	5-ATAAACAATTGTAAACA/TGTTTACAATTGTTTAT-3	5-RTAAACAATDGTAAACA/TGTTTACHATTGTTTAY-3
motif892	FOXI1_2|TTGTTTACCGTAMACAY	FOXI1	0	0	1	5-TTGTTTACCGTAAACAT/ATGTTTACGGTAAACAA-3	5-TTGTTTACCGTAMACAY/RTGTKTACGGTAAACAA-3
motif894	FOXJ3_2|TGTTTAYTGTTTAC	FOXJ3	0	0	1	5-TGTTTATTGTTTAC/GTAAACAATAAACA-3	5-TGTTTAYTGTTTAC/GTAAACARTAAACA-3
motif895	FOXK1|ATTGTGTCCG	FOXK1	0	0	1	5-ATTGTGTCCG/CGGACACAAT-3	5-ATTGTGTCCG/CGGACACAAT-3
motif897	FOXO1|WTGTTTAC	FOXO1	3	4	1	5-TTGTTTAC/GTAAACAA-3	5-WTGTTTAC/GTAAACAW-3
motif898	FOXO3|GTAAACATGTTTAC	FOXO3	0	0	1	5-GTAAACATGTTTAC/GTAAACATGTTTAC-3	5-GTAAACATGTTTAC/GTAAACATGTTTAC-3
motif900	FOXO6_2|TGTTTAC	FOXO6	4	4	1	5-TGTTTAC/GTAAACA-3	5-TGTTTAC/GTAAACA-3
motif901	FOXO6_3|TTTCCCCACACGAC	FOXO6	0	0	1	5-TTTCCCCACACGAC/GTCGTGTGGGGAAA-3	5-TTTCCCCACACGAC/GTCGTGTGGGGAAA-3
motif903	Foxc1|TGTTTRTTTAY	FOXC1	0	0	1	5-TGTTTATTTAC/GTAAATAAACA-3	5-TGTTTRTTTAY/RTAAAYAAACA-3
motif904	Foxj3_3|TTGTTTAY	FOXJ3	3	4	1	5-TTGTTTAC/GTAAACAA-3	5-TTGTTTAY/RTAAACAA-3
motif905	Foxj3_4|TGTTTWTGTTTAY	FOXJ3	0	0	1	5-TGTTTATGTTTAC/GTAAACATAAACA-3	5-TGTTTWTGTTTAY/RTAAACAWAAACA-3
motif906	Foxk1_2|TGTTTAY	FOXK1	4	4	1	5-TGTTTAC/GTAAACA-3	5-TGTTTAY/RTAAACA-3
motif912	CDX1|TTTATKRN	CDX1	4	4	1	5-TTTATTGC/GCAATAAA-3	5-TTTATKRN/NYMATAAA-3
motif913	CDX2|TTTTATKRN	CDX2	3	3	1	5-TTTTATTGC/GCAATAAAA-3	5-TTTTATKRN/NYMATAAAA-3
motif915	DPRX_2|GGATTATCN	DPRX	0	0	1	5-GGATTATCC/GGATAATCC-3	5-GGATTATCN/NGATAATCC-3
motif919	HESX1_2|TAATTGGYAATTA	HESX1	0	0	1	5-TAATTGGCAATTA/TAATTGCCAATTA-3	5-TAATTGGYAATTA/TAATTRCCAATTA-3
motif920	HMBOX1|KTAACTAR	HMBOX1	2	3	1	5-TTAACTAG/CTAGTTAA-3	5-KTAACTAR/YTAGTTAM-3
motif921	HMX1|TTAATTG	HMX1	2	2	1	5-TTAATTG/CAATTAA-3	5-TTAATTG/CAATTAA-3
motif922	HMX2|TTAAKTG	HMX2	2	2	1	5-TTAATTG/CAATTAA-3	5-TTAAKTG/CAMTTAA-3
motif924	HNF1B|RTTAATNATTAAC	HNF1B	0	0	1	5-GTTAATCATTAAC/GTTAATGATTAAC-3	5-RTTAATNATTAAC/GTTAATNATTAAY-3
motif926	HOXA10_2|TTTTATKRC	HOXA10	3	3	1	5-TTTTATTAC/GTAATAAAA-3	5-TTTTATKRC/GYMATAAAA-3
motif927	HOXB13|TTTTATTGG	HOXB13	0	1	1	5-TTTTATTGG/CCAATAAAA-3	5-TTTTATTGG/CCAATAAAA-3
motif930	HOXC10_2|TTTWATKRC	HOXC10	3	3	1	5-TTTTATTAC/GTAATAAAA-3	5-TTTWATKRC/GYMATWAAA-3
motif932	HOXC12_2|TTTTACGACY	HOXC12	0	0	1	5-TTTTACGACC/GGTCGTAAAA-3	5-TTTTACGACY/RGTCGTAAAA-3
motif934	HOXD13_2|TTTTACGAGN	HOXD13	0	0	1	5-TTTTACGAGC/GCTCGTAAAA-3	5-TTTTACGAGN/NCTCGTAAAA-3
motif939	Hoxd9|TTTWATKGS	HOXD9	0	1	1	5-TTTTATGGG/CCCATAAAA-3	5-TTTWATKGS/SCMATWAAA-3
motif940	Hoxd9_2|TTTWATTRC	HOXD9	3	3	1	5-TTTTATTGC/GCAATAAAA-3	5-TTTWATTRC/GYAATWAAA-3
motif942	IRX2|WACAYGACAW	IRX2	0	0	1	5-TACATGACAT/ATGTCATGTA-3	5-WACAYGACAW/WTGTCRTGTW-3
motif943	IRX5|WACAYRACAW	IRX5	0	0	1	5-TACATGACAT/ATGTCATGTA-3	5-WACAYRACAW/WTGTYRTGTW-3
motif945	ISX_2|TAATTRN	ISX	2	2	1	5-TAATTGG/CCAATTA-3	5-TAATTRN/NYAATTA-3
motif947	Irx3|TTTKTCATGTWR	IRX3	0	0	1	5-TTTGTCATGTAG/CTACATGACAAA-3	5-TTTKTCATGTWR/YWACATGAMAAA-3
motif948	LBX2|TAATTASNTYSAN	LBX2	0	0	1	5-TAATTAGGTCGAG/CTCGACCTAATTA-3	5-TAATTASNTYSAN/NTSRANSTAATTA-3
motif949	LHX2_2|YAATTAGNKTAATTR	LHX2	0	0	1	5-TAATTAGCGTAATTA/TAATTACGCTAATTA-3	5-YAATTAGNKTAATTR/YAATTAMNCTAATTR-3
motif950	LHX6|YTAATTANY	LHX6	0	0	1	5-CTAATTAGT/ACTAATTAG-3	5-YTAATTANY/RNTAATTAR-3
motif951	LHX6_2|TAATTAGYGYTRATTA	LHX6	0	0	1	5-TAATTAGCGCTAATTA/TAATTAGCGCTAATTA-3	5-TAATTAGYGYTRATTA/TAATYARCRCTAATTA-3
motif956	Lhx8_3|TRATTGCAATYA	LHX8	0	0	1	5-TAATTGCAATCA/TGATTGCAATTA-3	5-TRATTGCAATYA/TRATTGCAATYA-3
motif958	MEOX2_3|TAATGATGATKA	MEOX2	0	0	1	5-TAATGATGATTA/TAATCATCATTA-3	5-TAATGATGATKA/TMATCATCATTA-3
motif959	MNX1|NTAATTR	MNX1	7	8	1	5-TTAATTA/TAATTAA-3	5-NTAATTR/YAATTAN-3
motif960	MSX2|TAATTGSNWTTTAATTG	MSX2	0	0	1	5-TAATTGGTTTTTAATTG/CAATTAAAAACCAATTA-3	5-TAATTGSNWTTTAATTG/CAATTAAAWNSCAATTA-3
motif962	NKX2-3|NTYAAGTGG	NKX2-3	0	1	1	5-TTCAAGTGG/CCACTTGAA-3	5-NTYAAGTGG/CCACTTRAN-3
motif970	NOTO|TAATTAR	NOTO	3	3	1	5-TAATTAG/CTAATTA-3	5-TAATTAR/YTAATTA-3
motif973	Otx1|TAATCCGATTA	OTX1	0	0	1	5-TAATCCGATTA/TAATCGGATTA-3	5-TAATCCGATTA/TAATCGGATTA-3
motif975	PITX1_2|NTAATCC	PITX1	3	4	1	5-TTAATCC/GGATTAA-3	5-NTAATCC/GGATTAN-3
motif982	VENTX_2|CTAATCGTTTTCCSATTARSG	VENTX	0	0	1	5-CTAATCGTTTTCCGATTAGCG/CGCTAATCGGAAAACGATTAG-3	5-CTAATCGTTTTCCSATTARSG/CSYTAATSGGAAAACGATTAG-3
motif984	VSX2|TAATTAG	VSX2	1	1	1	5-TAATTAG/CTAATTA-3	5-TAATTAG/CTAATTA-3
motif985	ESR1|MAGGTCAYNGTGACCY	ESR1	0	0	1	5-CAGGTCACCGTGACCT/AGGTCACGGTGACCTG-3	5-MAGGTCAYNGTGACCY/RGGTCACNRTGACCTK-3
motif986	ESRRG_3|NSAAGGTCA	ESRRG	0	0	1	5-TCAAGGTCA/TGACCTTGA-3	5-NSAAGGTCA/TGACCTTSN-3
motif987	Esrra|DAGGTYAKTCAAGGTCA	ESRRA	0	0	1	5-TAGGTCAGTCAAGGTCA/TGACCTTGACTGACCTA-3	5-DAGGTYAKTCAAGGTCA/TGACCTTGAMTRACCTH-3
motif988	Esrra_2|ATGACCTTGAA	ESRRA	0	0	1	5-ATGACCTTGAA/TTCAAGGTCAT-3	5-ATGACCTTGAA/TTCAAGGTCAT-3
motif989	Hnf4a|TGGACTTTGACCYY	HNF4A	0	0	1	5-TGGACTTTGACCCC/GGGGTCAAAGTCCA-3	5-TGGACTTTGACCYY/RRGGTCAAAGTCCA-3
motif990	NR2E1|AAAAGTCAA	NR2E1	1	1	1	5-AAAAGTCAA/TTGACTTTT-3	5-AAAAGTCAA/TTGACTTTT-3
motif992	NR3C1|RGWACAYNRTGTWCY	NR3C1	0	0	1	5-GGTACATAATGTTCC/GGAACATTATGTACC-3	5-RGWACAYNRTGTWCY/RGWACAYNRTGTWCY-3
motif993	NR4A2|AGGTCANNNNNTGACCT	NR4A2	0	0	1	5-AGGTCACAGTTTGACCT/AGGTCAAACTGTGACCT-3	5-AGGTCANNNNNTGACCT/AGGTCANNNNNTGACCT-3
motif994	NR4A2_2|TGACCTTTAAAGGTCA	NR4A2	0	0	1	5-TGACCTTTAAAGGTCA/TGACCTTTAAAGGTCA-3	5-TGACCTTTAAAGGTCA/TGACCTTTAAAGGTCA-3
motif995	NR4A2_3|NNTAAAGGTCA	NR4A2	0	0	1	5-TTTAAAGGTCA/TGACCTTTAAA-3	5-NNTAAAGGTCA/TGACCTTTANN-3
motif996	Nr2e1|ANAAGTCAA	NR2E1	1	2	1	5-AAAAGTCAA/TTGACTTTT-3	5-ANAAGTCAA/TTGACTTNT-3
motif997	Nr2e1_2|TGACTTWTTGACTT	NR2E1	0	0	1	5-TGACTTATTGACTT/AAGTCAATAAGTCA-3	5-TGACTTWTTGACTT/AAGTCAAWAAGTCA-3
motif998	RORA_2|TAWCTRGGTYAGTAGGTCA	RORA	0	0	1	5-TAACTAGGTTAGTAGGTCA/TGACCTACTAACCTAGTTA-3	5-TAWCTRGGTYAGTAGGTCA/TGACCTACTRACCYAGWTA-3
motif999	RXRG_3|TGACCTTTGACCCC	RXRG	0	0	1	5-TGACCTTTGACCCC/GGGGTCAAAGGTCA-3	5-TGACCTTTGACCCC/GGGGTCAAAGGTCA-3
motif1000	Rara_3|TGACCTTTTGACCTY	RARA	0	0	1	5-TGACCTTTTGACCTT/AAGGTCAAAAGGTCA-3	5-TGACCTTTTGACCTY/RAGGTCAAAAGGTCA-3
motif1001	Rarg_2|TGACCTTTRNWTGACCTY	RARG	0	0	1	5-TGACCTTTAGATGACCTT/AAGGTCATCTAAAGGTCA-3	5-TGACCTTTRNWTGACCTY/RAGGTCAWNYAAAGGTCA-3
motif1002	Rarg_3|AAGGTCANSARAGGTCA	RARG	0	0	1	5-AAGGTCACGAAAGGTCA/TGACCTTTCGTGACCTT-3	5-AAGGTCANSARAGGTCA/TGACCTYTSNTGACCTT-3
motif1003	Rxra_2|RGGTCATGACCY	RXRA	0	0	1	5-GGGTCATGACCC/GGGTCATGACCC-3	5-RGGTCATGACCY/RGGTCATGACCY-3
motif1004	THRB_2|TGACCTTANTNAGGTCA	THRB	0	0	1	5-TGACCTTAATAAGGTCA/TGACCTTATTAAGGTCA-3	5-TGACCTTANTNAGGTCA/TGACCTNANTAAGGTCA-3
motif1005	THRB_3|TGACCTYAWNTRAGGTCA	THRB	0	0	1	5-TGACCTTATGTAAGGTCA/TGACCTTACATAAGGTCA-3	5-TGACCTYAWNTRAGGTCA/TGACCTYANWTRAGGTCA-3
motif1006	VDR|TGAACYCRATGAACYC	VDR	0	0	1	5-TGAACTCAATGAACTC/GAGTTCATTGAGTTCA-3	5-TGAACYCRATGAACYC/GRGTTCATYGRGTTCA-3
motif1007	TP63|RACATGTYGNRACATGTC	TP63	0	0	1	5-AACATGTTGGGACATGTC/GACATGTCCCAACATGTT-3	5-RACATGTYGNRACATGTC/GACATGTYNCRACATGTY-3
motif1008	Tp53|ACWTGTYNMYNGACWTGT	TP53	0	0	1	5-ACATGTCCATGGACATGT/ACATGTCCATGGACATGT-3	5-ACWTGTYNMYNGACWTGT/ACAWGTCNRKNRACAWGT-3
motif1009	Tp53_2|ACAWGTCNNWGACATGT	TP53	0	0	1	5-ACATGTCTATGACATGT/ACATGTCATAGACATGT-3	5-ACAWGTCNNWGACATGT/ACATGTCWNNGACWTGT-3
motif1010	GMEB2_4|TTACGTAN	GMEB2	0	0	1	5-TTACGTAA/TTACGTAA-3	5-TTACGTAN/NTACGTAA-3
motif1011	Egr1|WKTGAGKGGGCGK	EGR1	0	0	1	5-ATTGAGTGGGCGT/ACGCCCACTCAAT-3	5-WKTGAGKGGGCGK/MCGCCCMCTCAMW-3
motif1012	MTF1|TTTGCACACGGCAC	MTF1	0	0	1	5-TTTGCACACGGCAC/GTGCCGTGTGCAAA-3	5-TTTGCACACGGCAC/GTGCCGTGTGCAAA-3
motif1013	PRDM4|TTTCAAGGCCCCC	PRDM4	0	0	1	5-TTTCAAGGCCCCC/GGGGGCCTTGAAA-3	5-TTTCAAGGCCCCC/GGGGGCCTTGAAA-3
motif1014	ZBTB49|TTNCGCYTGGCVSGTCA	ZBTB49	0	0	1	5-TTTCGCCTGGCACGTCA/TGACGTGCCAGGCGAAA-3	5-TTNCGCYTGGCVSGTCA/TGACSBGCCARGCGNAA-3
motif1015	ZNF232|TGTTAAAYGTAGATTAAG	ZNF232	0	0	1	5-TGTTAAATGTAGATTAAG/CTTAATCTACATTTAACA-3	5-TGTTAAAYGTAGATTAAG/CTTAATCTACRTTTAACA-3
motif1016	ZNF282|CTTTCCCMYAACACGN	ZNF282	0	0	1	5-CTTTCCCACAACACGA/TCGTGTTGTGGGAAAG-3	5-CTTTCCCMYAACACGN/NCGTGTTRKGGGAAAG-3
motif1017	ZNF435|AGTGTTAACAGAACACCT	ZSCAN16	0	0	1	5-AGTGTTAACAGAACACCT/AGGTGTTCTGTTAACACT-3	5-AGTGTTAACAGAACACCT/AGGTGTTCTGTTAACACT-3
motif1018	ZNF713|TAGAARAATGCCACGAA	ZNF713	0	0	1	5-TAGAAAAATGCCACGAA/TTCGTGGCATTTTTCTA-3	5-TAGAARAATGCCACGAA/TTCGTGGCATTYTTCTA-3
motif1019	CPEB1|NTTTTATN	CPEB1	9	10	1	5-TTTTTATT/AATAAAAA-3	5-NTTTTATN/NATAAAAN-3
motif1020	E2F1_2|TTTGGCGCCAAA	E2F1	0	0	1	5-TTTGGCGCCAAA/TTTGGCGCCAAA-3	5-TTTGGCGCCAAA/TTTGGCGCCAAA-3
motif1021	E2F4|TTTGGCGCCATT	E2F4	0	0	1	5-TTTGGCGCCATT/AATGGCGCCAAA-3	5-TTTGGCGCCATT/AATGGCGCCAAA-3
motif1022	E2F4_2|TTTGGCGCCAAA	E2F4	0	0	1	5-TTTGGCGCCAAA/TTTGGCGCCAAA-3	5-TTTGGCGCCAAA/TTTGGCGCCAAA-3
motif1023	SOX10_2|AACAATRTKCAGTGTT	SOX10	0	0	1	5-AACAATGTTCAGTGTT/AACACTGAACATTGTT-3	5-AACAATRTKCAGTGTT/AACACTGMAYATTGTT-3
motif1024	SOX10_5|TGAATGTKCAGTCA	SOX10	0	0	1	5-TGAATGTTCAGTCA/TGACTGAACATTCA-3	5-TGAATGTKCAGTCA/TGACTGMACATTCA-3
motif1025	SOX15|AACAATGKTATTGTT	SOX15	0	0	1	5-AACAATGTTATTGTT/AACAATAACATTGTT-3	5-AACAATGKTATTGTT/AACAATAMCATTGTT-3
motif1026	SOX15_3|ATGAATAACATTCAT	SOX15	0	0	1	5-ATGAATAACATTCAT/ATGAATGTTATTCAT-3	5-ATGAATAACATTCAT/ATGAATGTTATTCAT-3
motif1027	Sox10_2|ATCAATTGCAGTGAT	SOX10	0	0	1	5-ATCAATTGCAGTGAT/ATCACTGCAATTGAT-3	5-ATCAATTGCAGTGAT/ATCACTGCAATTGAT-3
motif1028	Sox1_4|TGAATDRNHATTCA	SOX1	0	0	1	5-TGAATAGTCATTCA/TGAATGACTATTCA-3	5-TGAATDRNHATTCA/TGAATDNYHATTCA-3
motif1029	TBX20_5|TCACACCNTCACACCT	TBX20	0	0	1	5-TCACACCTTCACACCT/AGGTGTGAAGGTGTGA-3	5-TCACACCNTCACACCT/AGGTGTGANGGTGTGA-3
motif1030	TFEC|VTCAYGTG	TFEC	0	1	1	5-GTCACGTG/CACGTGAC-3	5-VTCAYGTG/CACRTGAB-3
motif1032	E2F1_3|WNTTGGCGCCAANW	E2F1	0	0	1	5-TTTTGGCGCCAAAA/TTTTGGCGCCAAAA-3	5-WNTTGGCGCCAANW/WNTTGGCGCCAANW-3
motif1033	YY2_3|ATGGCGGMATGN	YY2	0	0	1	5-ATGGCGGCATGG/CCATGCCGCCAT-3	5-ATGGCGGMATGN/NCATKCCGCCAT-3
motif1036	TFAP2A_5|TGCCYYRGGGCN	TFAP2A	0	0	1	5-TGCCCTAGGGCA/TGCCCTAGGGCA-3	5-TGCCYYRGGGCN/NGCCCYRRGGCA-3
motif1037	ELK1_4|ACTTCCGGT	ELK1	0	0	1	5-ACTTCCGGT/ACCGGAAGT-3	5-ACTTCCGGT/ACCGGAAGT-3
motif1039	NFE2_disc1|RTGACTCAGC	NFE2	0	0	1	5-ATGACTCAGC/GCTGAGTCAT-3	5-RTGACTCAGC/GCTGAGTCAY-3
motif1040	AP1_disc2|TCYSATTGGY	FOS	0	0	1	5-TCTGATTGGC/GCCAATCAGA-3	5-TCYSATTGGY/RCCAATSRGA-3
motif1041	ZBTB33_disc1|TCTCGCGAGA	ZBTB33	0	0	1	5-TCTCGCGAGA/TCTCGCGAGA-3	5-TCTCGCGAGA/TCTCGCGAGA-3
motif1042	AP1_disc3|RTGASTCAY	FOS	0	0	1	5-ATGAGTCAT/ATGACTCAT-3	5-RTGASTCAY/RTGASTCAY-3
motif1043	ETS_disc2|CACTTCCGGY	GABPA	0	0	1	5-CACTTCCGGT/ACCGGAAGTG-3	5-CACTTCCGGY/RCCGGAAGTG-3
motif1044	MAF_disc1|TGASTCAGCA	MAFK	0	0	1	5-TGACTCAGCA/TGCTGAGTCA-3	5-TGASTCAGCA/TGCTGASTCA-3
motif1045	SP2_disc1|NNYBATTGGYY	SP2	0	0	1	5-TCCCATTGGCT/AGCCAATGGGA-3	5-NNYBATTGGYY/RRCCAATVRNN-3
motif1047	NFKB_disc1|GGRAWTYCCC	RELA|RELB|REL|NFKB1|NFKB2	0	1	1	5-GGAAATTCCC/GGGAATTTCC-3	5-GGRAWTYCCC/GGGRAWTYCC-3
motif1048	RFX5_disc1|GTTGCYAGGS	RFX5	0	0	1	5-GTTGCTAGGG/CCCTAGCAAC-3	5-GTTGCYAGGS/SCCTRGCAAC-3
motif1049	TAL1_disc1|CTTATCWSNNNNNNSCAG	TAL1	0	0	1	5-CTTATCTGCCCCCACCAG/CTGGGGGGGGCAGATAAG-3	5-CTTATCWSNNNNNNSCAG/CTGSNNNNNNSWGATAAG-3
motif1050	SPI1_disc1|AAGAGGAAGT	SPI1	0	0	1	5-AAGAGGAAGT/ACTTCCTCTT-3	5-AAGAGGAAGT/ACTTCCTCTT-3
motif1051	RFX5_disc2|CTGATTGGYT	RFX5	0	0	1	5-CTGATTGGCT/AGCCAATCAG-3	5-CTGATTGGYT/ARCCAATCAG-3
motif1055	SIX5_disc3|AAACTACATTTCCCA	SIX5	0	0	1	5-AAACTACATTTCCCA/TGGGAAATGTAGTTT-3	5-AAACTACATTTCCCA/TGGGAAATGTAGTTT-3
motif1056	NR2C2_disc1|TTCCGGGTCN	NR2C2	0	0	1	5-TTCCGGGTCA/TGACCCGGAA-3	5-TTCCGGGTCN/NGACCCGGAA-3
motif1057	BHLHE40_disc1|KCACGTGMC	BHLHE40	0	0	1	5-TCACGTGAC/GTCACGTGA-3	5-KCACGTGMC/GKCACGTGM-3
motif1058	STAT_disc1|TTCCWGGAA	STAT1	0	0	1	5-TTCCAGGAA/TTCCTGGAA-3	5-TTCCWGGAA/TTCCWGGAA-3
motif1059	SPI1_disc2|TTTCASTTCC	SPI1	0	0	1	5-TTTCACTTCC/GGAAGTGAAA-3	5-TTTCASTTCC/GGAASTGAAA-3
motif1060	TCF7L2_disc1|VTGASTCAB	TCF7L2	0	0	1	5-GTGACTCAC/GTGAGTCAC-3	5-VTGASTCAB/VTGASTCAB-3
motif1061	REST_disc3|GGACAGCKCC	REST	0	0	1	5-GGACAGCGCC/GGCGCTGTCC-3	5-GGACAGCKCC/GGMGCTGTCC-3
motif1062	CTCF_disc2|ACCAGGKGGCR	CTCF	0	0	1	5-ACCAGGGGGCG/CGCCCCCTGGT-3	5-ACCAGGKGGCR/YGCCMCCTGGT-3
motif1063	SP2_disc2|ATTGGNYNNNNYNSCYGYCMNTC	SP2	0	0	1	5-ATTGGCCAGCGTGGCTGTCAGTC/GACTGACAGCCACGCTGGCCAAT-3	5-ATTGGNYNNNNYNSCYGYCMNTC/GANKGRCRGSNRNNNNRNCCAAT-3
motif1064	EBF1_disc1|TCCCHDGGGA	EBF1	0	0	1	5-TCCCCGGGGA/TCCCCGGGGA-3	5-TCCCHDGGGA/TCCCHDGGGA-3
motif1066	PRDM1_disc1|ACTTTCACT	PRDM1	0	1	1	5-ACTTTCACT/AGTGAAAGT-3	5-ACTTTCACT/AGTGAAAGT-3
motif1067	ZNF143_disc1|TACAAYTCCC	ZNF143	0	0	1	5-TACAATTCCC/GGGAATTGTA-3	5-TACAAYTCCC/GGGARTTGTA-3
motif1068	SMARC_disc1|CTGASTCAYC	SMARCB1	0	0	1	5-CTGAGTCACC/GGTGACTCAG-3	5-CTGASTCAYC/GRTGASTCAG-3
motif1069	CTCF_disc3|ACTAGAKGG	CTCF	0	0	1	5-ACTAGAGGG/CCCTCTAGT-3	5-ACTAGAKGG/CCMTCTAGT-3
motif1073	MYC_disc2|NCACGTGS	MYC	0	0	1	5-CCACGTGG/CCACGTGG-3	5-NCACGTGS/SCACGTGN-3
motif1074	CTCF_disc4|CASYWGRTGGCAGC	CTCF	0	0	1	5-CACTAGATGGCAGC/GCTGCCATCTAGTG-3	5-CASYWGRTGGCAGC/GCTGCCAYCWRSTG-3
motif1075	E2F_disc1|TGACGTCANS	E2F1	0	0	1	5-TGACGTCACC/GGTGACGTCA-3	5-TGACGTCANS/SNTGACGTCA-3
motif1076	ETS_disc4|AACCGGAAN	GABPA	0	0	1	5-AACCGGAAG/CTTCCGGTT-3	5-AACCGGAAN/NTTCCGGTT-3
motif1080	STAT_disc3|ASTTTCNNTTYC	STAT1	0	1	1	5-AGTTTCATTTTC/GAAAATGAAACT-3	5-ASTTTCNNTTYC/GRAANNGAAAST-3
motif1081	NR3C1_disc2|VTGASTCAS	NR3C1	0	0	1	5-GTGACTCAC/GTGAGTCAC-3	5-VTGASTCAS/STGASTCAB-3
motif1082	SIN3A_disc1|TCAGCACCNNGGACA	SIN3A	0	0	1	5-TCAGCACCACGGACA/TGTCCGTGGTGCTGA-3	5-TCAGCACCNNGGACA/TGTCCNNGGTGCTGA-3
motif1083	SIN3A_disc2|YCACGTGRCC	SIN3A	0	0	1	5-TCACGTGGCC/GGCCACGTGA-3	5-YCACGTGRCC/GGYCACGTGR-3
motif1084	HSF_disc1|GTTAYRYAAC	HSF1	0	0	1	5-GTTATGCAAC/GTTGCATAAC-3	5-GTTAYRYAAC/GTTRYRTAAC-3
motif1086	CTCFL_disc1|CAGGGGGCGC	CTCFL	0	0	1	5-CAGGGGGCGC/GCGCCCCCTG-3	5-CAGGGGGCGC/GCGCCCCCTG-3
motif1087	PAX5_disc2|SAASCGTGAC	PAX5	0	0	1	5-CAAGCGTGAC/GTCACGCTTG-3	5-SAASCGTGAC/GTCACGSTTS-3
motif1090	CTCF_disc5|NCNSNNGVNGSC	CTCF	0	0	1	5-CCAGCAGGGGGC/GCCCCCTGCTGG-3	5-NCNSNNGVNGSC/GSCNBCNNSNGN-3
motif1091	TATA_disc1|CAARATGGCG	TAF1	0	1	1	5-CAAGATGGCG/CGCCATCTTG-3	5-CAARATGGCG/CGCCATYTTG-3
motif1092	CTCF_disc6|ACCTAGNG	CTCF	0	0	1	5-ACCTAGTG/CACTAGGT-3	5-ACCTAGNG/CNCTAGGT-3
motif1094	TFAP2_disc1|RTGASTCAB	TFAP2A	0	0	1	5-GTGAGTCAT/ATGACTCAC-3	5-RTGASTCAB/VTGASTCAY-3
motif1095	TCF7L2_disc2|ASWTCAAAG	TCF7L2	0	0	1	5-AGATCAAAG/CTTTGATCT-3	5-ASWTCAAAG/CTTTGAWST-3
motif1096	AP1_disc4|TTTCANTATGANT	JUND	0	0	1	5-TTTCAGTATGACT/AGTCATACTGAAA-3	5-TTTCANTATGANT/ANTCATANTGAAA-3
motif1097	CTCF_disc7|CCNCCAGGGG	CTCF	0	0	1	5-CCACCAGGGG/CCCCTGGTGG-3	5-CCNCCAGGGG/CCCCTGGNGG-3
motif1098	MAF_disc2|AAAATGCTGA	MAFF	0	0	1	5-AAAATGCTGA/TCAGCATTTT-3	5-AAAATGCTGA/TCAGCATTTT-3
motif1099	NR2C2_disc2|ACCTYTGACC	NR2C2	0	0	1	5-ACCTTTGACC/GGTCAAAGGT-3	5-ACCTYTGACC/GGTCARAGGT-3
motif1100	CTCF_disc8|RSNRGVNGVNGS	CTCF	2	3	1	5-ACAGGCAGGTGC/GCACCTGCCTGT-3	5-RSNRGVNGVNGS/SCNBCNBCYNSY-3
motif1101	MYC_disc5|TTGCATCAKC	MYC	0	0	1	5-TTGCATCAGC/GCTGATGCAA-3	5-TTGCATCAKC/GMTGATGCAA-3
motif1102	RAD21_disc4|ACCTRGTGG	RAD21	0	0	1	5-ACCTGGTGG/CCACCAGGT-3	5-ACCTRGTGG/CCACYAGGT-3
motif1104	IRF_disc3|AARNGAAAGTGAAAS	IRF1	0	0	1	5-AAATGAAAGTGAAAG/CTTTCACTTTCACTT-3	5-AARNGAAAGTGAAAS/STTTCACTTTCNYTT-3
motif1105	FOXA_disc2|AATATTKACH	FOXA1	0	0	1	5-AATATTGACA/TGTCAATATT-3	5-AATATTKACH/DGTMAATATT-3
motif1109	SIN3A_disc3|ACCAWGGACAG	SIN3A	0	0	1	5-ACCATGGACAG/CTGTCCATGGT-3	5-ACCAWGGACAG/CTGTCCWTGGT-3
motif1112	AP1_disc5|ACTCACCAS	FOS	0	0	1	5-ACTCACCAC/GTGGTGAGT-3	5-ACTCACCAS/STGGTGAGT-3
motif1113	AP1_disc6|AAAACCYGGAGMGG	JUND	0	0	1	5-AAAACCCGGAGCGG/CCGCTCCGGGTTTT-3	5-AAAACCYGGAGMGG/CCKCTCCRGGTTTT-3
motif1114	PBX3_disc2|TGAKTGRCAG	PBX3	0	0	1	5-TGAGTGACAG/CTGTCACTCA-3	5-TGAKTGRCAG/CTGYCAMTCA-3
motif1115	HEY1_disc1|TGACGTCA	HEY1	0	0	1	5-TGACGTCA/TGACGTCA-3	5-TGACGTCA/TGACGTCA-3
motif1116	TCF12_disc1|VCACCTGS	TCF12	0	1	1	5-ACACCTGG/CCAGGTGT-3	5-VCACCTGS/SCAGGTGB-3
motif1117	HNF4_disc2|AAGTYCAGH	HNF4A	0	0	1	5-AAGTCCAGT/ACTGGACTT-3	5-AAGTYCAGH/DCTGRACTT-3
motif1119	MYC_disc6|AAGYCACGT	USF2	0	0	1	5-AAGTCACGT/ACGTGACTT-3	5-AAGYCACGT/ACGTGRCTT-3
motif1123	BCL_disc6|GGRNTTYCCC	BCL3	0	1	1	5-GGGCTTTCCC/GGGAAAGCCC-3	5-GGRNTTYCCC/GGGRAANYCC-3
motif1124	ZBTB33_disc2|BCYCGCSVS	ZBTB33	0	0	1	5-TCCCGCGAG/CTCGCGGGA-3	5-BCYCGCSVS/SBSGCGRGV-3
motif1125	IRF_disc5|YYCWSYTCCY	IRF4	3	3	1	5-TTCACTTCCT/AGGAAGTGAA-3	5-YYCWSYTCCY/RGGARSWGRR-3
motif1127	ETS_disc5|ACAACTCC	ETS1	0	0	1	5-ACAACTCC/GGAGTTGT-3	5-ACAACTCC/GGAGTTGT-3
motif1128	E2F_disc3|TTCCCGCC	E2F4	0	0	1	5-TTCCCGCC/GGCGGGAA-3	5-TTCCCGCC/GGCGGGAA-3
motif1129	CTCF_disc10|ACCTGCWGG	CTCF	0	0	1	5-ACCTGCTGG/CCAGCAGGT-3	5-ACCTGCWGG/CCWGCAGGT-3
motif1130	RAD21_disc7|SCNBSNNSNGGS	RAD21	0	0	1	5-CCAGCTGCTGGC/GCCAGCAGCTGG-3	5-SCNBSNNSNGGS/SCCNSNNSVNGS-3
motif1131	EP300_disc4|ACNTCCGG	EP300	0	0	1	5-ACTTCCGG/CCGGAAGT-3	5-ACNTCCGG/CCGGANGT-3
motif1132	TATA_disc4|GGGGCGGGGC	TBP	0	0	1	5-GGGGCGGGGC/GCCCCGCCCC-3	5-GGGGCGGGGC/GCCCCGCCCC-3
motif1133	STAT_disc4|ATTGCWCAA	STAT3	1	1	1	5-ATTGCACAA/TTGTGCAAT-3	5-ATTGCWCAA/TTGWGCAAT-3
motif1134	REST_disc6|ACAGCG	REST	1	1	1	5-ACAGCG/CGCTGT-3	5-ACAGCG/CGCTGT-3
motif1136	RXRA_disc3|NTGASTCAN	RXRA	0	0	1	5-ATGACTCAT/ATGAGTCAT-3	5-NTGASTCAN/NTGASTCAN-3
motif1137	RAD21_disc8|SCNSNNGSCWSN	RAD21	0	0	1	5-CCAGGGGGCAGC/GCTGCCCCCTGG-3	5-SCNSNNGSCWSN/NSWGSCNNSNGS-3
motif1138	MXI1_disc2|VCACGTGG	MXI1	0	0	1	5-CCACGTGG/CCACGTGG-3	5-VCACGTGG/CCACGTGB-3
motif1140	E2F_disc4|YGATTGGCYG	E2F4	0	0	1	5-TGATTGGCTG/CAGCCAATCA-3	5-YGATTGGCYG/CRGCCAATCR-3
motif1144	MYC_disc7|AACACGTG	MAX	0	0	1	5-AACACGTG/CACGTGTT-3	5-AACACGTG/CACGTGTT-3
motif1145	ZBTB7A_disc1|AGGGGGCGCT	ZBTB7A	0	0	1	5-AGGGGGCGCT/AGCGCCCCCT-3	5-AGGGGGCGCT/AGCGCCCCCT-3
motif1146	MEF2_disc3|ATGASTCAG	MEF2C	0	0	1	5-ATGAGTCAG/CTGACTCAT-3	5-ATGASTCAG/CTGASTCAT-3
motif1147	RAD21_disc9|ACTMSABKRNRNN	RAD21	0	1	1	5-ACTAGACGAGATG/CATCTCGTCTAGT-3	5-ACTMSABKRNRNN/NNYNYMVTSKAGT-3
motif1149	NFKB_disc4|AAASTCCCM	RELA|RELB|REL|NFKB1|NFKB2	0	0	1	5-AAAGTCCCC/GGGGACTTT-3	5-AAASTCCCM/KGGGASTTT-3
motif1151	PAX5_disc4|ANAGGAAGTG	PAX5	0	1	1	5-AGAGGAAGTG/CACTTCCTCT-3	5-ANAGGAAGTG/CACTTCCTNT-3
motif1152	REST_disc7|ACAGCKWC	REST	0	0	1	5-ACAGCGTC/GACGCTGT-3	5-ACAGCKWC/GWMGCTGT-3
motif1154	IRF_disc6|AAGTTTCA	IRF4	0	1	1	5-AAGTTTCA/TGAAACTT-3	5-AAGTTTCA/TGAAACTT-3
motif1155	BATF_disc2|AAGTTTCAS	BATF	0	1	1	5-AAGTTTCAC/CTGAAACTT-3	5-AAGTTTCAS/STGAAACTT-3
motif1156	MYC_disc8|ACCGCGTN	MYC	0	0	1	5-ACCGCGTG/CACGCGGT-3	5-ACCGCGTN/NACGCGGT-3
motif1157	THAP1_disc2|AACATGGCSG	THAP1	0	0	1	5-AACATGGCGG/CCGCCATGTT-3	5-AACATGGCSG/CSGCCATGTT-3
motif1158	SMC3_disc4|CTGGTGGC	SMC3	0	0	1	5-CTGGTGGC/GCCACCAG-3	5-CTGGTGGC/GCCACCAG-3
motif1159	SIX5_disc4|AAAACTACAW	SIX5	0	0	1	5-AAAACTACAA/TTGTAGTTTT-3	5-AAAACTACAW/WTGTAGTTTT-3
motif1160	NRF1_disc2|AASCGGAA	NRF1	0	0	1	5-AAGCGGAA/TTCCGCTT-3	5-AASCGGAA/TTCCGSTT-3
motif1161	BDP1_disc1|CCTCCTCCAGGAAGCCCTCCNGG	GTF3C2	0	0	1	5-CCTCCTCCAGGAAGCCCTCCGGG/CCCGGAGGGCTTCCTGGAGGAGG-3	5-CCTCCTCCAGGAAGCCCTCCNGG/CCNGGAGGGCTTCCTGGAGGAGG-3
motif1164	HDAC2_disc4|CGCGHGCGCG	HDAC2	0	0	1	5-CGCGCGCGCG/CGCGCGCGCG-3	5-CGCGHGCGCG/CGCGCDCGCG-3
motif1166	EP300_disc6|ATTACATCA	EP300	0	0	1	5-ATTACATCA/TGATGTAAT-3	5-ATTACATCA/TGATGTAAT-3
motif1167	HDAC2_disc5|AARGTCMAG	HDAC2	0	1	1	5-AAAGTCCAG/CTGGACTTT-3	5-AARGTCMAG/CTKGACYTT-3
motif1169	NR3C1_disc5|TCAGCAGG	NR3C1	1	2	1	5-TCAGCAGG/CCTGCTGA-3	5-TCAGCAGG/CCTGCTGA-3
motif1171	BDP1_disc2|GTTCGAATCC	GTF3C2	0	0	1	5-GTTCGAATCC/GGATTCGAAC-3	5-GTTCGAATCC/GGATTCGAAC-3
motif1173	AP1_disc8|TMAYTTCCTT	JUN	0	0	1	5-TCATTTCCTT/AAGGAAATGA-3	5-TMAYTTCCTT/AAGGAARTKA-3
motif1174	TATA_disc6|TTCTGATTGG	TBP	0	0	1	5-TTCTGATTGG/CCAATCAGAA-3	5-TTCTGATTGG/CCAATCAGAA-3
motif1176	MYC_disc10|SCNSCNBSC	MYC	1	1	1	5-CCCCCCGCC/GGCGGGGGG-3	5-SCNSCNBSC/GSVNGSNGS-3
motif1177	TCF12_disc3|AGGKGCGS	TCF12	0	0	1	5-AGGTGCGG/CCGCACCT-3	5-AGGKGCGS/SCGCMCCT-3
motif1179	BCL_disc7|ACAGCKCCC	BCL3	0	0	1	5-ACAGCTCCC/GGGAGCTGT-3	5-ACAGCKCCC/GGGMGCTGT-3
motif1180	ETS_disc6|AAATCTCGCG	ETS1	0	0	1	5-AAATCTCGCG/CGCGAGATTT-3	5-AAATCTCGCG/CGCGAGATTT-3
motif1183	BATF_disc3|AAATGACTRG	BATF	1	1	1	5-AAATGACTGG/CCAGTCATTT-3	5-AAATGACTRG/CYAGTCATTT-3
motif1184	NANOG_disc3|CHCAGCAGG	NANOG	2	2	1	5-CACAGCAGG/CCTGCTGTG-3	5-CHCAGCAGG/CCTGCTGDG-3
motif1185	TATA_disc8|CGGAAGNCGC	TAF1	0	0	1	5-CGGAAGTCGC/GCGACTTCCG-3	5-CGGAAGNCGC/GCGNCTTCCG-3
motif1186	SRF_disc2|SCCSSSCBC	SRF	0	0	1	5-GCCGGGCCC/GGGCCCGGC-3	5-SCCSSSCBC/GVGSSSGGS-3
motif1187	E2F_disc5|AAAGGCGS	E2F1	0	0	1	5-AAAGGCGC/GCGCCTTT-3	5-AAAGGCGS/SCGCCTTT-3
motif1188	TFAP2_disc2|GSCCTGRGGS	TFAP2A	0	0	1	5-GCCCTGGGGC/GCCCCAGGGC-3	5-GSCCTGRGGS/SCCYCAGGSC-3
motif1192	AP1_disc10|GSSNNGSNGS	FOS	0	0	1	5-GGGGGGCGGG/CCCGCCCCCC-3	5-GSSNNGSNGS/SCNSCNNSSC-3
motif1194	EP300_disc7|ATGACACH	EP300	0	0	1	5-ATGACACA/TGTGTCAT-3	5-ATGACACH/DGTGTCAT-3
motif1199	SIN3A_disc4|ACAGCTCCK	SIN3A	0	0	1	5-ACAGCTCCT/AGGAGCTGT-3	5-ACAGCTCCK/MGGAGCTGT-3
motif1200	PAX5_disc5|GCGCGSGCGC	PAX5	0	0	1	5-GCGCGCGCGC/GCGCGCGCGC-3	5-GCGCGSGCGC/GCGCSCGCGC-3
motif1202	ZNF263_disc1|CCTCCTCCCY	ZNF263	0	1	1	5-CCTCCTCCCC/GGGGAGGAGG-3	5-CCTCCTCCCY/RGGGAGGAGG-3
motif1203	GATA_disc5|AGCCAARCC	GATA3	0	0	1	5-AGCCAAGCC/GGCTTGGCT-3	5-AGCCAARCC/GGYTTGGCT-3
motif1204	FOXA_disc3|TCARCAGG	FOXA1	2	2	1	5-TCAGCAGG/CCTGCTGA-3	5-TCARCAGG/CCTGYTGA-3
motif1205	ZBTB7A_disc2|AAGGGGCG	ZBTB7A	0	0	1	5-AAGGGGCG/CGCCCCTT-3	5-AAGGGGCG/CGCCCCTT-3
motif1206	YY1_disc3|SSCCNCCGCC	YY1	0	0	1	5-CGCCGCCGCC/GGCGGCGGCG-3	5-SSCCNCCGCC/GGCGGNGGSS-3
motif1210	EGR1_disc5|WGGGCGGT	EGR1	0	1	1	5-TGGGCGGT/ACCGCCCA-3	5-WGGGCGGT/ACCGCCCW-3
motif1211	EP300_disc8|CGGCGCCSSC	EP300	0	0	1	5-CGGCGCCCGC/GCGGGCGCCG-3	5-CGGCGCCSSC/GSSGGCGCCG-3
motif1212	BCL_disc8|SSNNNSSNSSSSVS	BCLAF1	0	0	1	5-GCCGGGCAGCGGGG/CCCCGCTGCCCGGC-3	5-SSNNNSSNSSSSVS/SBSSSSNSSNNNSS-3
motif1213	HNF4_disc4|MTGTTTGCT	HNF4G	0	0	1	5-CTGTTTGCT/AGCAAACAG-3	5-MTGTTTGCT/AGCAAACAK-3
motif1214	RXRA_disc5|AGAGGGCG	RXRA	0	1	1	5-AGAGGGCG/CGCCCTCT-3	5-AGAGGGCG/CGCCCTCT-3
motif1215	ZBTB33_disc3|AACTCTCGCG	ZBTB33	0	0	1	5-AACTCTCGCG/CGCGAGAGTT-3	5-AACTCTCGCG/CGCGAGAGTT-3
motif1217	TRIM28_disc2|AGAGAARSC	TRIM28	2	2	1	5-AGAGAAACC/GGTTTCTCT-3	5-AGAGAARSC/GSYTTCTCT-3
motif1218	REST_disc10|AAGGTGCTG	REST	0	0	1	5-AAGGTGCTG/CAGCACCTT-3	5-AAGGTGCTG/CAGCACCTT-3
motif1219	FOXA_disc4|AARTTCCT	FOXA1	0	1	1	5-AAATTCCT/AGGAATTT-3	5-AARTTCCT/AGGAAYTT-3
motif1224	SP2_disc3|AAGGGGCGGG	SP2	0	0	1	5-AAGGGGCGGG/CCCGCCCCTT-3	5-AAGGGGCGGG/CCCGCCCCTT-3
motif1225	STAT_disc5|AAATTCCT	STAT3	0	1	1	5-AAATTCCT/AGGAATTT-3	5-AAATTCCT/AGGAATTT-3
motif1226	NR2C2_disc3|ACCCCGSN	NR2C2	0	0	1	5-ACCCCGGA/TCCGGGGT-3	5-ACCCCGSN/NSCGGGGT-3
motif1228	E2F_disc7|GSSGGCGSGG	E2F4	0	0	1	5-GGCGGCGCGG/CCGCGCCGCC-3	5-GSSGGCGSGG/CCSCGCCSSC-3
motif1229	TCF12_disc6|ATTCCWGGC	TCF12	0	0	1	5-ATTCCAGGC/GCCTGGAAT-3	5-ATTCCWGGC/GCCWGGAAT-3
motif1231	NRF1_disc3|GNGSGCGSNG	NRF1	0	0	1	5-GCGGGCGGGG/CCCCGCCCGC-3	5-GNGSGCGSNG/CNSCGCSCNC-3
motif1232	ATF3_disc4|SSVCGYSVCS	ATF3	0	0	1	5-CCCCGCGCCC/GGGCGCGGGG-3	5-SSVCGYSVCS/SGBSRCGBSS-3
motif1233	SIN3A_disc6|BSNCWSCNSS	SIN3A	2	2	1	5-GCTCAGCCGC/GCGGCTGAGC-3	5-BSNCWSCNSS/SSNGSWGNSV-3
motif1235	YY1_disc4|SSNSNNNSSGSNSSS	YY1	0	0	1	5-GCAGCCGGCGCCGCC/GGCGGCGCCGGCTGC-3	5-SSNSNNNSSGSNSSS/SSSNSCSSNNNSNSS-3
motif1237	ETS_disc8|AACGGAM	GABPA	0	1	1	5-AACGGAA/TTCCGTT-3	5-AACGGAM/KTCCGTT-3
motif1241	HNF4_disc5|ACAMAGGGC	HNF4G	0	1	1	5-ACAAAGGGC/GCCCTTTGT-3	5-ACAMAGGGC/GCCCTKTGT-3
motif1242	GATA_disc6|AGTCAGCT	GATA2	1	1	1	5-AGTCAGCT/AGCTGACT-3	5-AGTCAGCT/AGCTGACT-3
motif1243	EGR1_disc7|CRCGCACGC	EGR1	0	0	1	5-CACGCACGC/GCGTGCGTG-3	5-CRCGCACGC/GCGTGCGYG-3
motif1244	EP300_disc9|SNNSNSNSNNSSNGS	EP300	0	0	1	5-GCTCCCAGCGGCTGC/GCAGCCGCTGGGAGC-3	5-SNNSNSNSNNSSNGS/SCNSSNNSNSNSNNS-3
motif1247	ZBTB33_disc4|AACCYCGC	ZBTB33	0	0	1	5-AACCTCGC/GCGAGGTT-3	5-AACCYCGC/GCGRGGTT-3
motif1249	E2F_disc8|SCNGSNSSSSS	E2F1	0	0	1	5-GCAGCCGCCGC/GCGGCGGCTGC-3	5-SCNGSNSSSSS/SSSSSNSCNGS-3
motif1251	POU5F1_disc2|ATGMATATGC	POU5F1	0	1	1	5-ATGAATATGC/GCATATTCAT-3	5-ATGMATATGC/GCATATKCAT-3
motif1252	SIN3A_disc7|SCNNGSNCAGCNSC	SIN3A	0	0	1	5-CCCCGGACAGCGCC/GGCGCTGTCCGGGG-3	5-SCNNGSNCAGCNSC/GSNGCTGNSCNNGS-3
motif1254	CEBPB_disc2|TSATTGGCT	CEBPB	0	0	1	5-TGATTGGCT/AGCCAATCA-3	5-TSATTGGCT/AGCCAATSA-3
motif1259	XBP-1|TGACGTGK|M03233	XBP1	0	0	1	5-TGACGTGT/ACACGTCA-3	5-TGACGTGK/MCACGTCA-3
motif1261	HIF-1alpha|NACGTGCNNS|M03238	HIF1A	0	0	1	5-GACGTGCGGC/GCCGCACGTC-3	5-NACGTGCNNS/SNNGCACGTN-3
motif1263	TTF-1|TCAAGTNT|M03241	NKX2-1	1	2	1	5-TCAAGTGT/ACACTTGA-3	5-TCAAGTNT/ANACTTGA-3
motif1264	ATF-6|TGACGTGG|M03243	ATF6	0	1	1	5-TGACGTGG/CCACGTCA-3	5-TGACGTGG/CCACGTCA-3
motif1265	PRRX2, PRRX1|TAATT|M03244	PRRX2|PRRX1	13	15	1	5-TAATT/AATTA-3	5-TAATT/AATTA-3
motif1267	Spi-B|TTCCTST|M03247	SPIB	4	5	1	5-TTCCTCT/AGAGGAA-3	5-TTCCTST/ASAGGAA-3
motif1269	FOXP3|RANNTGTTNTTTCANA|M03253	FOXP3	0	0	1	5-GAAATGTTGTTTCAGA/TCTGAAACAACATTTC-3	5-RANNTGTTNTTTCANA/TNTGAAANAACANNTY-3
motif1270	ATF-4|NNTKRCGTCABS|M03255	ATF4	0	0	1	5-CGTGACGTCACC/GGTGACGTCACG-3	5-NNTKRCGTCABS/SVTGACGYMANN-3
motif1271	MEIS1:Hoxa9|YYRTNAANNTGTCA|M03256	MEIS1|HOXA9	0	0	1	5-TCATAAAACTGTCA/TGACAGTTTTATGA-3	5-YYRTNAANNTGTCA/TGACANNTTNAYRR-3
motif1274	AP-2beta|NCNCNGCCYGSGGSC|M03261	TFAP2B	0	0	1	5-CCTCCGCCCGCGGCC/GGCCGCGGGCGGAGG-3	5-NCNCNGCCYGSGGSC/GSCCSCRGGCNGNGN-3
motif1275	ZID|GRNGATGGAGCC|M03262	ZBTB6	0	1	1	5-GGTGATGGAGCC/GGCTCCATCACC-3	5-GRNGATGGAGCC/GGCTCCATCNYC-3
motif1276	ATF-2|TKACRTMA|M03263	ATF2	1	1	1	5-TTACATCA/TGATGTAA-3	5-TKACRTMA/TKAYGTMA-3
motif1278	ZBP89|CRNCNNSWGGGTGNGG|M03265	ZNF148	0	0	1	5-CAGCCCGTGGGTGGGG/CCCCACCCACGGGCTG-3	5-CRNCNNSWGGGTGNGG/CCNCACCCWSNNGNYG-3
motif1282	TEF-1|NACATTCCWS|M03273	TEAD1	0	0	1	5-CACATTCCTC/GAGGAATGTG-3	5-NACATTCCWS/SWGGAATGTN-3
motif1284	GZF1|TATAKANGCGCA|M03281	GZF1	0	0	1	5-TATATAAGCGCA/TGCGCTTATATA-3	5-TATAKANGCGCA/TGCGCNTMTATA-3
motif1287	ZF5|WGCGCGCCCCC|M03287	ZBTB14	0	0	1	5-AGCGCGCCCCC/GGGGGCGCGCT-3	5-WGCGCGCCCCC/GGGGGCGCGCW-3
motif1288	Pax-1|ATATNTAGAGCGGAANGG|M03290	PAX1	0	0	1	5-ATATCTAGAGCGGAACGG/CCGTTCCGCTCTAGATAT-3	5-ATATNTAGAGCGGAANGG/CCNTTCCGCTCTANATAT-3
motif1291	MyoD|NRRCAGGTGNYG|M03301	MYOD1	0	0	1	5-GAACAGGTGGTG/CACCACCTGTTC-3	5-NRRCAGGTGNYG/CRNCACCTGYYN-3
motif1292	MafB|RCGTCAGC|M03302	MAFB	0	1	1	5-GCGTCAGC/GCTGACGC-3	5-RCGTCAGC/GCTGACGY-3
motif1294	LHX3, LHX4|TAATTAAWT|M03305	LHX3|LHX4	0	1	1	5-TAATTAATT/AATTAATTA-3	5-TAATTAAWT/AWTTAATTA-3
motif1295	Gfi1|CMAATCASNG|M03308	GFI1	0	0	1	5-CCAATCACAG/CTGTGATTGG-3	5-CMAATCASNG/CNSTGATTKG-3
motif1301	cdc5L|TTATNTTAAATC|M03318	CDC5L	0	1	1	5-TTATGTTAAATC/GATTTAACATAA-3	5-TTATNTTAAATC/GATTTAANATAA-3
motif1303	Pax-5|CASTGRNGCGNRRC|M03324	PAX5	0	0	1	5-CACTGAAGCGGAGC/GCTCCGCTTCAGTG-3	5-CASTGRNGCGNRRC/GYYNCGCNYCASTG-3
motif1304	Alx-4|GATTATTCTCAGG|M03325	ALX4	0	0	1	5-GATTATTCTCAGG/CCTGAGAATAATC-3	5-GATTATTCTCAGG/CCTGAGAATAATC-3
motif1306	HNF-1alpha|NAAWWATTAACY|M03331	HNF1A	0	0	1	5-TAATTATTAACC/GGTTAATAATTA-3	5-NAAWWATTAACY/RGTTAATWWTTN-3
motif1307	AIRE|TTWTTANTTGGTTNTNTTKRNT|M03332	AIRE	0	0	1	5-TTATTAATTGGTTATATTGGTT/AACCAATATAACCAATTAATAA-3	5-TTWTTANTTGGTTNTNTTKRNT/ANYMAANANAACCAANTAAWAA-3
motif1308	FXR|TYNYTRACCYNG|M03333	NR1H4	0	0	1	5-TTATTGACCCTG/CAGGGTCAATAA-3	5-TYNYTRACCYNG/CNRGGTYARNRA-3
motif1310	E4BP4|TTATGTAAY|M03338	NFIL3	1	1	1	5-TTATGTAAC/GTTACATAA-3	5-TTATGTAAY/RTTACATAA-3
motif1312	ZEB1|RCACCTGK|M03342	ZEB1	0	1	1	5-GCACCTGG/CCAGGTGC-3	5-RCACCTGK/MCAGGTGY-3
motif1313	HES-1|GSCTYGTGSC|M03343	HES1	0	0	1	5-GCCTCGTGGC/GCCACGAGGC-3	5-GSCTYGTGSC/GSCACRAGSC-3
motif1314	Pax-4|RAAWAAWWWMMNNWNNNMNNNNNHNMNYNC|M03345	PAX4	0	0	1	5-AAAAAATATCAAATACTACACTCCCACCCC/GGGGTGGGAGTGTAGTATTTGATATTTTTT-3	5-RAAWAAWWWMMNNWNNNMNNNNNHNMNYNC/GNRNKNDNNNNNKNNNWNNKKWWWTTWTTY-3
motif1315	PATZ|GGGGGRGGGGM|M03346	PATZ1	0	0	1	5-GGGGGAGGGGC/GCCCCTCCCCC-3	5-GGGGGRGGGGM/KCCCCYCCCCC-3
motif1318	RP58|MACATCTGGN|M03354	ZBTB18	0	0	1	5-AACATCTGGA/TCCAGATGTT-3	5-MACATCTGGN/NCCAGATGTK-3
motif1320	MTF-1|TBTGCRCMCGGCCC|M03356	MTF1	0	0	1	5-TCTGCACCCGGCCC/GGGCCGGGTGCAGA-3	5-TBTGCRCMCGGCCC/GGGCCGKGYGCAVA-3
motif1322	MRF2|AANYACAATACMVA|M03363	ARID5B	0	0	1	5-AACCACAATACCAA/TTGGTATTGTGGTT-3	5-AANYACAATACMVA/TBKGTATTGTRNTT-3
motif1323	LUN|TCCCAAAGTNGCTGGGA|M03364	TOPORS	0	0	1	5-TCCCAAAGTAGCTGGGA/TCCCAGCTACTTTGGGA-3	5-TCCCAAAGTNGCTGGGA/TCCCAGCNACTTTGGGA-3
motif1324	COE1|AYTCCCNRGRGRR|M03368	EBF1	0	0	1	5-ACTCCCCGGGGAA/TTCCCCGGGGAGT-3	5-AYTCCCNRGRGRR/YYCYCYNGGGART-3
motif1326	Csx|TTAATTG|M03371	NKX2-5	6	7	1	5-TTAATTG/CAATTAA-3	5-TTAATTG/CAATTAA-3
motif1328	SPZ1|AGGGTWACAGC|M03373	SPZ1	0	0	1	5-AGGGTAACAGC/GCTGTTACCCT-3	5-AGGGTWACAGC/GCTGTWACCCT-3
motif1329	TBP|TATAAAARN|M03378	TBP	2	3	1	5-TATAAAAGG/CCTTTTATA-3	5-TATAAAARN/NYTTTTATA-3
motif1330	FAC1|TKTGTTKTG|M03379	BPTF	4	5	1	5-TTTGTTTTG/CAAAACAAA-3	5-TKTGTTKTG/CAMAACAMA-3
motif1332	CP2|GCTGGNTYNNGCYNG|M03381	TFCP2	0	0	1	5-GCTGGGTCGCGCTGG/CCAGCGCGACCCAGC-3	5-GCTGGNTYNNGCYNG/CNRGCNNRANCCAGC-3
motif1336	FOXC1|TACTTWC|M03390	FOXC1	1	1	1	5-TACTTAC/GTAAGTA-3	5-TACTTWC/GWAAGTA-3
motif1337	c-Myb|CAACYGCC|M03391	MYB	0	1	1	5-CAACCGCC/GGCGGTTG-3	5-CAACYGCC/GGCRGTTG-3
motif1340	PLZF|TTRNWTNKNWKNTAAANNTTKNNYWRTTY|M03395	ZBTB16	0	0	1	5-TTGTTTTTAAGTTAAAGTTTTATTTATTT/AAATAAATAAAACTTTAACTTAAAAACAA-3	5-TTRNWTNKNWKNTAAANNTTKNNYWRTTY/RAAYWRNNMAANNTTTANMWNMNAWNYAA-3
motif1342	AP-4|WGNRNCAGCTGNNG|M03397	TFAP4	0	0	1	5-AGAACCAGCTGCGG/CCGCAGCTGGTTCT-3	5-WGNRNCAGCTGNNG/CNNCAGCTGNYNCW-3
motif1343	Blimp-1|YMCTTTCNCTTYCT|M03398	PRDM1	0	0	1	5-TCCTTTCCCTTCCT/AGGAAGGGAAAGGA-3	5-YMCTTTCNCTTYCT/AGRAAGNGAAAGKR-3
motif1347	NANOG|GNAAATGRSC|M03409	NANOG	0	1	1	5-GGAAATGGGC/GCCCATTTCC-3	5-GNAAATGRSC/GSYCATTTNC-3
motif1348	Oct3|TTTGCAT|M03411	POU5F1	2	3	1	5-TTTGCAT/ATGCAAA-3	5-TTTGCAT/ATGCAAA-3
motif1349	Sox2|AACAAWG|M03412	SOX2	9	10	1	5-AACAAAG/CTTTGTT-3	5-AACAAWG/CWTTGTT-3
motif1350	Zic3|CCCAGCGGG|M04594	ZIC3	0	0	1	5-CCCAGCGGG/CCCGCTGGG-3	5-CCCAGCGGG/CCCGCTGGG-3
motif1351	SALL2|CCCACCC|M04595	SALL2	0	1	1	5-CCCACCC/GGGTGGG-3	5-CCCACCC/GGGTGGG-3
motif1352	Foxn2|TAGCGTC|M04643	FOXN2	0	0	1	5-TAGCGTC/GACGCTA-3	5-TAGCGTC/GACGCTA-3
motif1354	Foxn4|NTNGCGTC|M04645	FOXN4	0	0	1	5-ATGGCGTC/GACGCCAT-3	5-NTNGCGTC/GACGCNAN-3
motif1357	Foxr1|TGGCGTC|M04648	FOXR1	0	0	1	5-TGGCGTC/GACGCCA-3	5-TGGCGTC/GACGCCA-3
motif1358	FOXA2|TNTTTAC|M04649	FOXA2	2	3	1	5-TGTTTAC/GTAAACA-3	5-TNTTTAC/GTAAANA-3
motif1360	foxj3|NTGTTTAN|M04653	FOXJ3	3	4	1	5-TTGTTTAC/GTAAACAA-3	5-NTGTTTAN/NTAAACAN-3
motif1361	FOXK1|TTGTTTAC|M04655	FOXK1	3	4	1	5-TTGTTTAC/GTAAACAA-3	5-TTGTTTAC/GTAAACAA-3
motif1366	foxm1|GATGCATC|M04663	FOXM1	0	0	1	5-GATGCATC/GATGCATC-3	5-GATGCATC/GATGCATC-3
motif1367	foxm1|AACAA|M04664	FOXM1	22	23	1	5-AACAA/TTGTT-3	5-AACAA/TTGTT-3
motif1368	ZBTB42|KGGCTTGCCCC|M05295	ZBTB42	0	0	1	5-TGGCTTGCCCC/GGGGCAAGCCA-3	5-KGGCTTGCCCC/GGGGCAAGCCM-3
motif1370	OVOL3|KKGGSCCGATCCCGACC|M05298	OVOL3	0	0	1	5-GGGGGCCGATCCCGACC/GGTCGGGATCGGCCCCC-3	5-KKGGSCCGATCCCGACC/GGTCGGGATCGGSCCMM-3
motif1371	NKX2-6|ACAAAACGGT|M05299	NKX2-6	0	0	1	5-ACAAAACGGT/ACCGTTTTGT-3	5-ACAAAACGGT/ACCGTTTTGT-3
motif1372	CPBP|CCGCCC|M05301	KLF6	0	1	1	5-CCGCCC/GGGCGG-3	5-CCGCCC/GGGCGG-3
motif1374	Zbtb5|GAAGCTYCCT|M05304	ZBTB5	0	0	1	5-GAAGCTTCCT/AGGAAGCTTC-3	5-GAAGCTYCCT/AGGRAGCTTC-3
motif1375	ZNF688|MBCAKWAGACC|M05310	ZNF688	0	0	1	5-CTCAGAAGACC/GGTCTTCTGAG-3	5-MBCAKWAGACC/GGTCTWMTGVK-3
motif1376	FKLF|NGGGCGGGKG|M05312	KLF11	0	0	1	5-AGGGCGGGTG/CACCCGCCCT-3	5-NGGGCGGGKG/CMCCCGCCCN-3
motif1378	HOXB2|TTTAATAAGG|M05316	HOXB2	0	0	1	5-TTTAATAAGG/CCTTATTAAA-3	5-TTTAATAAGG/CCTTATTAAA-3
motif1380	KLF8|CCCCCGCCC|M05318	KLF8	0	0	1	5-CCCCCGCCC/GGGCGGGGG-3	5-CCCCCGCCC/GGGCGGGGG-3
motif1381	T-box protein 6|TTCACACCTR|M05322	TBX6	0	0	1	5-TTCACACCTA/TAGGTGTGAA-3	5-TTCACACCTR/YAGGTGTGAA-3
motif1382	WT1|NGKKSACCCCCCCGC|M05327	WT1	0	0	1	5-AGGTGACCCCCCCGC/GCGGGGGGGTCACCT-3	5-NGKKSACCCCCCCGC/GCGGGGGGGTSMMCN-3
motif1383	Pax-4|KCTTCACGCATGAAAGYCCAG|M05328	PAX4	0	0	1	5-TCTTCACGCATGAAAGTCCAG/CTGGACTTTCATGCGTGAAGA-3	5-KCTTCACGCATGAAAGYCCAG/CTGGRCTTTCATGCGTGAAGM-3
motif1384	BTEB4|GMTTGGGGGGC|M05329	KLF16	0	0	1	5-GATTGGGGGGC/GCCCCCCAATC-3	5-GMTTGGGGGGC/GCCCCCCAAKC-3
motif1385	Emx-1|GTTAATAKGAW|M05330	EMX1	0	0	1	5-GTTAATATGAA/TTCATATTAAC-3	5-GTTAATAKGAW/WTCMTATTAAC-3
motif1386	Sp2|NGGGCGG|M05332	SP2	0	1	1	5-AGGGCGG/CCGCCCT-3	5-NGGGCGG/CCGCCCN-3
motif1389	ZNF293|KTGGGAAAAGGGRAAKGS|M05349	SNAI3	0	0	1	5-GTGGGAAAAGGGGAAGGG/CCCTTCCCCTTTTCCCAC-3	5-KTGGGAAAAGGGRAAKGS/SCMTTYCCCTTTTCCCAM-3
motif1390	OZF|GTTAAAGGA|M05350	ZNF146	0	1	1	5-GTTAAAGGA/TCCTTTAAC-3	5-GTTAAAGGA/TCCTTTAAC-3
motif1391	ZNF692|AMCTTTAAADGS|M05352	ZNF692	0	0	1	5-ACCTTTAAAGGC/GCCTTTAAAGGT-3	5-AMCTTTAAADGS/SCHTTTAAAGKT-3
motif1393	FOXE3|TTAAAWTGTCTTTAAC|M05355	FOXE3	0	0	1	5-TTAAATTGTCTTTAAC/GTTAAAGACAATTTAA-3	5-TTAAAWTGTCTTTAAC/GTTAAAGACAWTTTAA-3
motif1394	Brn-3b|AAACATAAGR|M05357	POU4F2	0	0	1	5-AAACATAAGA/TCTTATGTTT-3	5-AAACATAAGR/YCTTATGTTT-3
motif1396	TIEG-1|NGGGCGGGTG|M05360	KLF10	0	0	1	5-AGGGCGGGTG/CACCCGCCCT-3	5-NGGGCGGGTG/CACCCGCCCN-3
motif1397	HNF-4gamma|NWTGAACTTTGACCTT|M05363	HNF4G	0	0	1	5-GTTGAACTTTGACCTT/AAGGTCAAAGTTCAAC-3	5-NWTGAACTTTGACCTT/AAGGTCAAAGTTCAWN-3
motif1398	OZF|GATTMTTGACS|M05364	ZNF146	0	0	1	5-GATTCTTGACC/GGTCAAGAATC-3	5-GATTMTTGACS/SGTCAAKAATC-3
motif1399	TBX2|ATTTCACACCT|M05365	TBX2	0	0	1	5-ATTTCACACCT/AGGTGTGAAAT-3	5-ATTTCACACCT/AGGTGTGAAAT-3
motif1400	ZNF746|GWCCCACCCAC|M05368	ZNF746	0	0	1	5-GTCCCACCCAC/GTGGGTGGGAC-3	5-GWCCCACCCAC/GTGGGTGGGWC-3
motif1401	Zfp740|AWAAGCCTTMTCCSCCCCA|M05379	ZNF740	0	0	1	5-ATAAGCCTTATCCGCCCCA/TGGGGCGGATAAGGCTTAT-3	5-AWAAGCCTTMTCCSCCCCA/TGGGGSGGAKAAGGCTTWT-3
motif1403	ZNF826|KCTGCWGCMC|M05381	ZNF826P	0	0	1	5-GCTGCAGCCC/GGGCTGCAGC-3	5-KCTGCWGCMC/GKGCWGCAGM-3
motif1404	Zfp653|STTGGGGTG|M05387	ZNF653	0	1	1	5-GTTGGGGTG/CACCCCAAC-3	5-STTGGGGTG/CACCCCAAS-3
motif1405	TBPL2|GATTTAAAAG|M05390	TBPL2	0	0	1	5-GATTTAAAAG/CTTTTAAATC-3	5-GATTTAAAAG/CTTTTAAATC-3
motif1406	Scrt2|TCGKTTGAC|M05392	SCRT2	0	0	1	5-TCGTTTGAC/GTCAAACGA-3	5-TCGKTTGAC/GTCAAMCGA-3
motif1407	ZNF579|KTCGKGGTCCGGACCGC|M05394	ZNF579	0	0	1	5-TTCGTGGTCCGGACCGC/GCGGTCCGGACCACGAA-3	5-KTCGKGGTCCGGACCGC/GCGGTCCGGACCMCGAM-3
motif1408	ZFP276|GATTTGTCCAACKGR|M05395	ZNF276	0	0	1	5-GATTTGTCCAACTGA/TCAGTTGGACAAATC-3	5-GATTTGTCCAACKGR/YCMGTTGGACAAATC-3
motif1409	Plagl2|BAACCCCAASCVV|M05396	PLAGL2	0	0	1	5-CAACCCCAAGCAC/GTGCTTGGGGTTG-3	5-BAACCCCAASCVV/BBGSTTGGGGTTV-3
motif1410	EZF-2|SRAACCCCCCCCCAMAC|M05397	ZNF444	0	0	1	5-GAAACCCCCCCCCACAC/GTGTGGGGGGGGGTTTC-3	5-SRAACCCCCCCCCAMAC/GTKTGGGGGGGGGTTYS-3
motif1411	OSR2|WGGCCGACAGGTTGGG|M05398	OSR2	0	0	1	5-AGGCCGACAGGTTGGG/CCCAACCTGTCGGCCT-3	5-WGGCCGACAGGTTGGG/CCCAACCTGTCGGCCW-3
motif1412	Scrt2|GACCNACAMCAATGCCGC|M05399	SCRT2	0	0	1	5-GACCAACAACAATGCCGC/GCGGCATTGTTGTTGGTC-3	5-GACCNACAMCAATGCCGC/GCGGCATTGKTGTNGGTC-3
motif1413	ZNF687|AAGTTTGTCGTTCGWAV|M05400	ZNF687	0	0	1	5-AAGTTTGTCGTTCGAAA/TTTCGAACGACAAACTT-3	5-AAGTTTGTCGTTCGWAV/BTWCGAACGACAAACTT-3
motif1414	Zfp445|TRGKTTAATAGGAGCCWM|M05401	ZNF445	0	0	1	5-TGGGTTAATAGGAGCCAA/TTGGCTCCTATTAACCCA-3	5-TRGKTTAATAGGAGCCWM/KWGGCTCCTATTAAMCYA-3
motif1415	BCL-6B|ATGAAKGAAGTWCNNNSGTATWNATN|M05402	BCL6B	0	0	1	5-ATGAATGAAGTTCCCCCGTATTTATA/TATAAATACGGGGGAACTTCATTCAT-3	5-ATGAAKGAAGTWCNNNSGTATWNATN/NATNWATACSNNNGWACTTCMTTCAT-3
motif1416	Zfp508|GATTGGCCCRG|M05403	ADNP2	0	0	1	5-GATTGGCCCGG/CCGGGCCAATC-3	5-GATTGGCCCRG/CYGGGCCAATC-3
motif1417	Zfp445|TCCCTTGWCCV|M05404	ZNF445	0	0	1	5-TCCCTTGTCCA/TGGACAAGGGA-3	5-TCCCTTGWCCV/BGGWCAAGGGA-3
motif1418	Zbtb44|TCACMG|M05405	ZBTB44	16	17	1	5-TCACAG/CTGTGA-3	5-TCACMG/CKGTGA-3
motif1419	ZNF781|AACCAWATCCCN|M05406	ZNF781	0	0	1	5-AACCAAATCCCA/TGGGATTTGGTT-3	5-AACCAWATCCCN/NGGGATWTGGTT-3
motif1420	ZNF438|MCAATMCGMKCKT|M05408	ZNF438	0	0	1	5-ACAATACGATCGT/ACGATCGTATTGT-3	5-MCAATMCGMKCKT/AMGMKCGKATTGK-3
motif1421	APA1|NGTTTAGMAAC|M05409	ZNF410	0	0	1	5-AGTTTAGCAAC/GTTGCTAAACT-3	5-NGTTTAGMAAC/GTTKCTAAACN-3
motif1422	ZSCAN1|GGGKACAYKNGGC|M05410	ZSCAN1	0	0	1	5-GGGGACACGAGGC/GCCTCGTGTCCCC-3	5-GGGKACAYKNGGC/GCCNMRTGTMCCC-3
motif1423	Zfp784|ARTAATAAAGA|M05411	ZNF784	0	0	1	5-AATAATAAAGA/TCTTTATTATT-3	5-ARTAATAAAGA/TCTTTATTAYT-3
motif1424	ZNF579|CCCCWCCCCRC|M05412	ZNF579	0	0	1	5-CCCCACCCCGC/GCGGGGTGGGG-3	5-CCCCWCCCCRC/GYGGGGWGGGG-3
motif1425	ZNF663|STTGTTCGG|M05413	ZNF663	0	0	1	5-GTTGTTCGG/CCGAACAAC-3	5-STTGTTCGG/CCGAACAAS-3
motif1426	ZNF521|TCCGGCCCCCM|M05418	ZNF521	0	0	1	5-TCCGGCCCCCA/TGGGGGCCGGA-3	5-TCCGGCCCCCM/KGGGGGCCGGA-3
motif1427	ZNF499|GTTCCGGANGC|M05419	ZBTB45	0	0	1	5-GTTCCGGACGC/GCGTCCGGAAC-3	5-GTTCCGGANGC/GCNTCCGGAAC-3
motif1428	ZNF339|KGTACCGGCCGTM|M05420	OVOL2	0	0	1	5-GGTACCGGCCGTC/GACGGCCGGTACC-3	5-KGTACCGGCCGTM/KACGGCCGGTACM-3
motif1429	Mynn|RTTCCTTSCGC|M05421	MYNN	0	0	1	5-GTTCCTTCCGC/GCGGAAGGAAC-3	5-RTTCCTTSCGC/GCGSAAGGAAY-3
motif1430	FOXD4L4|AWTCCCTTGATTTACCK|M05422	FOXD4L4	0	0	1	5-ATTCCCTTGATTTACCG/CGGTAAATCAAGGGAAT-3	5-AWTCCCTTGATTTACCK/MGGTAAATCAAGGGAWT-3
motif1431	RREB-1|GCGTTTACCYGCCAC|M05423	RREB1	0	0	1	5-GCGTTTACCCGCCAC/GTGGCGGGTAAACGC-3	5-GCGTTTACCYGCCAC/GTGGCRGGTAAACGC-3
motif1432	ZNF342|GTGGGAAACGC|M05424	ZNF296	0	0	1	5-GTGGGAAACGC/GCGTTTCCCAC-3	5-GTGGGAAACGC/GCGTTTCCCAC-3
motif1433	ZFP91|AAGTTTTATCTAC|M05426	ZFP91	0	0	1	5-AAGTTTTATCTAC/GTAGATAAAACTT-3	5-AAGTTTTATCTAC/GTAGATAAAACTT-3
motif1434	ZNF516|YGTAAAGCCT|M05427	ZNF516	0	0	1	5-CGTAAAGCCT/AGGCTTTACG-3	5-YGTAAAGCCT/AGGCTTTACR-3
motif1435	ZNF521|GCTACCGGAGRCGGYGGG|M05429	ZNF521	0	0	1	5-GCTACCGGAGACGGTGGG/CCCACCGTCTCCGGTAGC-3	5-GCTACCGGAGRCGGYGGG/CCCRCCGYCTCCGGTAGC-3
motif1436	RREB-1|TGATTGGCCAC|M05430	RREB1	0	0	1	5-TGATTGGCCAC/GTGGCCAATCA-3	5-TGATTGGCCAC/GTGGCCAATCA-3
motif1437	ZNF342|AGGGAAACGM|M05431	ZNF296	0	0	1	5-AGGGAAACGA/TCGTTTCCCT-3	5-AGGGAAACGM/KCGTTTCCCT-3
motif1438	ZSCAN18|TRRCGRCGDMCC|M05432	ZSCAN18	0	0	1	5-TGGCGGCGTACC/GGTACGCCGCCA-3	5-TRRCGRCGDMCC/GGKHCGYCGYYA-3
motif1440	Nkx2-3|HAAAGAYGATNNNNNNMRT|M05440	NKX2-3	0	0	1	5-TAAAGATGATGCCTCCCGT/ACGGCAGCCATCATCTTTA-3	5-HAAAGAYGATNNNNNNMRT/AYKNNNNNNATCRTCTTTD-3
motif1441	NOR1|TRTTTAGATCA|M05442	NR4A3	0	0	1	5-TGTTTAGATCA/TGATCTAAACA-3	5-TRTTTAGATCA/TGATCTAAAYA-3
motif1443	ZNF702|TCGGATAACCC|M05446	ZNF702P	0	0	1	5-TCGGATAACCC/GGGTTATCCGA-3	5-TCGGATAACCC/GGGTTATCCGA-3
motif1444	Insm2|ACYGWTTCGRTTGCC|M05447	INSM2	0	0	1	5-ACTGATTCGATTGCC/GGCAATCGAATCAGT-3	5-ACYGWTTCGRTTGCC/GGCAAYCGAAWCRGT-3
motif1445	Zfp414|AATCTSCTAGCAC|M05449	ZNF414	0	0	1	5-AATCTGCTAGCAC/GTGCTAGCAGATT-3	5-AATCTSCTAGCAC/GTGCTAGSAGATT-3
motif1446	Zfp654|YGTYYATAATGATGGT|M05450	ZNF654	0	0	1	5-TGTCTATAATGATGGT/ACCATCATTATAGACA-3	5-YGTYYATAATGATGGT/ACCATCATTATRRACR-3
motif1447	ZNF541|TTGGTTGGTWC|M05451	ZNF541	0	0	1	5-TTGGTTGGTAC/GTACCAACCAA-3	5-TTGGTTGGTWC/GWACCAACCAA-3
motif1448	PRDM13|DTWATCCCGGGCTCGCAA|M05452	PRDM13	0	0	1	5-GTAATCCCGGGCTCGCAA/TTGCGAGCCCGGGATTAC-3	5-DTWATCCCGGGCTCGCAA/TTGCGAGCCCGGGATWAH-3
motif1449	ZBTB26|KTGGTTGAAAAMAGGRT|M05453	ZBTB26	0	0	1	5-GTGGTTGAAAACAGGAT/ATCCTGTTTTCAACCAC-3	5-KTGGTTGAAAAMAGGRT/AYCCTKTTTTCAACCAM-3
motif1450	ZBTB3|GTTGRMACC|M05454	ZBTB3	0	1	1	5-GTTGACACC/GGTGTCAAC-3	5-GTTGRMACC/GGTKYCAAC-3
motif1451	T-bet|TTAACACCTA|M05457	TBX21	0	0	1	5-TTAACACCTA/TAGGTGTTAA-3	5-TTAACACCTA/TAGGTGTTAA-3
motif1452	ZBTB4|ATTTATGGCAC|M05461	ZBTB4	0	0	1	5-ATTTATGGCAC/GTGCCATAAAT-3	5-ATTTATGGCAC/GTGCCATAAAT-3
motif1453	znf581|TGTGGGCAC|M05462	ZNF581	0	0	1	5-TGTGGGCAC/GTGCCCACA-3	5-TGTGGGCAC/GTGCCCACA-3
motif1454	ZIM2|YCRTTTATCCACCCCYGC|M05463	ZIM2	0	0	1	5-CCATTTATCCACCCCCGC/GCGGGGGTGGATAAATGG-3	5-YCRTTTATCCACCCCYGC/GCRGGGGTGGATAAAYGR-3
motif1455	Sall1|NMTTTHCGMMT|M05464	SALL1	0	0	1	5-CCTTTACGCCT/AGGCGTAAAGG-3	5-NMTTTHCGMMT/AKKCGDAAAKN-3
motif1456	ZNF293|RGTYTGTYGTCGCMH|M05465	SNAI3	0	0	1	5-AGTTTGTCGTCGCAA/TTGCGACGACAAACT-3	5-RGTYTGTYGTCGCMH/DKGCGACRACARACY-3
motif1457	Sall1|TYMCYMGGACC|M05467	SALL1	0	0	1	5-TCCCCAGGACC/GGTCCTGGGGA-3	5-TYMCYMGGACC/GGTCCKRGKRA-3
motif1458	Sall1|CAWTGCGYA|M05469	SALL1	0	0	1	5-CATTGCGCA/TGCGCAATG-3	5-CAWTGCGYA/TRCGCAWTG-3
motif1459	Zfp575|GGTGGGGGGGC|M05471	ZNF575	0	0	1	5-GGTGGGGGGGC/GCCCCCCCACC-3	5-GGTGGGGGGGC/GCCCCCCCACC-3
motif1460	ZBTB41|GGRTYTGTCCCGACT|M05472	ZBTB41	0	0	1	5-GGATTTGTCCCGACT/AGTCGGGACAAATCC-3	5-GGRTYTGTCCCGACT/AGTCGGGACARAYCC-3
motif1462	ZASC1|NGATGCCAACGGAGSC|M05474	ZNF639	0	0	1	5-AGATGCCAACGGAGGC/GCCTCCGTTGGCATCT-3	5-NGATGCCAACGGAGSC/GSCTCCGTTGGCATCN-3
motif1463	ZBTB41|TCTACCCCCCA|M05475	ZBTB41	0	0	1	5-TCTACCCCCCA/TGGGGGGTAGA-3	5-TCTACCCCCCA/TGGGGGGTAGA-3
motif1464	aebp2|CTACWGTGGCCGMT|M05476	AEBP2	0	0	1	5-CTACTGTGGCCGAT/ATCGGCCACAGTAG-3	5-CTACWGTGGCCGMT/AKCGGCCACWGTAG-3
motif1465	ZASC1|ATRCGACTAAGGGAYTGC|M05477	ZNF639	0	0	1	5-ATGCGACTAAGGGATTGC/GCAATCCCTTAGTCGCAT-3	5-ATRCGACTAAGGGAYTGC/GCARTCCCTTAGTCGYAT-3
motif1466	ZFP202|KTWGCTACCCA|M05478	ZNF202	0	0	1	5-GTTGCTACCCA/TGGGTAGCAAC-3	5-KTWGCTACCCA/TGGGTAGCWAM-3
motif1467	znf580|ACACCGCCC|M05479	ZNF580	0	0	1	5-ACACCGCCC/GGGCGGTGT-3	5-ACACCGCCC/GGGCGGTGT-3
motif1468	ZFP202|GTYCCCCCCCC|M05481	ZNF202	0	0	1	5-GTCCCCCCCCC/GGGGGGGGGAC-3	5-GTYCCCCCCCC/GGGGGGGGRAC-3
motif1469	ZFP202|ATTCGCCCC|M05482	ZNF202	0	0	1	5-ATTCGCCCC/GGGGCGAAT-3	5-ATTCGCCCC/GGGGCGAAT-3
motif1470	ZBTB1|ACCTGACTACGCCAAC|M05483	ZBTB1	0	0	1	5-ACCTGACTACGCCAAC/GTTGGCGTAGTCAGGT-3	5-ACCTGACTACGCCAAC/GTTGGCGTAGTCAGGT-3
motif1471	ZNF212|WAACATGCACA|M05484	ZNF212	0	1	1	5-TAACATGCACA/TGTGCATGTTA-3	5-WAACATGCACA/TGTGCATGTTW-3
motif1472	Zscan4f|GCATTTACCCS|M05485	ZSCAN4	0	0	1	5-GCATTTACCCG/CGGGTAAATGC-3	5-GCATTTACCCS/SGGGTAAATGC-3
motif1473	Blimp-1|TATCCAAAACA|M05486	PRDM1	0	0	1	5-TATCCAAAACA/TGTTTTGGATA-3	5-TATCCAAAACA/TGTTTTGGATA-3
motif1474	ZNF542|AMTACCYTCMY|M05487	ZNF542	0	0	1	5-ACTACCCTCAT/ATGAGGGTAGT-3	5-AMTACCYTCMY/RKGARGGTAKT-3
motif1475	ZSCAN5B|TGTTAATSSGSC|M05488	ZSCAN5B	0	0	1	5-TGTTAATGGGGC/GCCCCATTAACA-3	5-TGTTAATSSGSC/GSCSSATTAACA-3
motif1476	LEF-1|AACTCAYTCCR|M05489	LEF1	0	0	1	5-AACTCACTCCG/CGGAGTGAGTT-3	5-AACTCAYTCCR/YGGARTGAGTT-3
motif1477	Egr-4|TGACCCACRCCCA|M05491	EGR4	0	0	1	5-TGACCCACACCCA/TGGGTGTGGGTCA-3	5-TGACCCACRCCCA/TGGGYGTGGGTCA-3
motif1479	Egr-2|GCGTGGGCGG|M05494	EGR2	0	0	1	5-GCGTGGGCGG/CCGCCCACGC-3	5-GCGTGGGCGG/CCGCCCACGC-3
motif1480	DRRS|GTAGTCAGC|M05498	SALL4	0	0	1	5-GTAGTCAGC/GCTGACTAC-3	5-GTAGTCAGC/GCTGACTAC-3
motif1482	ZBTB8B|CTATCCCCY|M05501	ZBTB8B	0	0	1	5-CTATCCCCT/AGGGGATAG-3	5-CTATCCCCY/RGGGGATAG-3
motif1483	Zfp641|AGGGGGGGGGN|M05504	ZNF641	0	0	1	5-AGGGGGGGGGC/GCCCCCCCCCT-3	5-AGGGGGGGGGN/NCCCCCCCCCT-3
motif1484	Zfp661|GTTGNAGGCRA|M05505	ZNF2	0	0	1	5-GTTGCAGGCGA/TCGCCTGCAAC-3	5-GTTGNAGGCRA/TYGCCTNCAAC-3
motif1485	ZNF392|KTTCTTGTACC|M05506	ZSCAN16	0	0	1	5-TTTCTTGTACC/GGTACAAGAAA-3	5-KTTCTTGTACC/GGTACAAGAAM-3
motif1486	Aiolos|MACKCCCCCCCC|M05507	IKZF3	0	0	1	5-CACGCCCCCCCC/GGGGGGGGCGTG-3	5-MACKCCCCCCCC/GGGGGGGGMGTK-3
motif1487	ZAC|TTCTTCCCCM|M05509	PLAGL1	0	0	1	5-TTCTTCCCCC/GGGGGAAGAA-3	5-TTCTTCCCCM/KGGGGAAGAA-3
motif1488	PLAGL2|TCAMAAGCMACT|M05510	PLAGL2	0	0	1	5-TCACAAGCCACT/AGTGGCTTGTGA-3	5-TCAMAAGCMACT/AGTKGCTTKTGA-3
motif1489	Zfp641|KNCCCACCCC|M05513	ZNF641	0	0	1	5-TTCCCACCCC/GGGGTGGGAA-3	5-KNCCCACCCC/GGGGTGGGNM-3
motif1490	ZER6|RTTTGGGCGGR|M05514	ZNF398	0	0	1	5-GTTTGGGCGGG/CCCGCCCAAAC-3	5-RTTTGGGCGGR/YCCGCCCAAAY-3
motif1491	ZNF280B|TNTATTKGMTY|M05515	ZNF280B	0	0	1	5-TCTATTGGATT/AATCCAATAGA-3	5-TNTATTKGMTY/RAKCMAATANA-3
motif1492	Gm397|GAAGCCWGCCT|M05516	ZSCAN4	0	1	1	5-GAAGCCTGCCT/AGGCAGGCTTC-3	5-GAAGCCWGCCT/AGGCWGGCTTC-3
motif1493	HELIOS|AACTGAACGAATC|M05517	IKZF2	0	0	1	5-AACTGAACGAATC/GATTCGTTCAGTT-3	5-AACTGAACGAATC/GATTCGTTCAGTT-3
motif1494	ZNF513|WGAAGGGAGAGGAGGGTT|M05518	ZNF513	0	0	1	5-TGAAGGGAGAGGAGGGTT/AACCCTCCTCTCCCTTCA-3	5-WGAAGGGAGAGGAGGGTT/AACCCTCCTCTCCCTTCW-3
motif1495	Zfp312|KYTGCCARACN|M05519	FEZF2	0	0	1	5-GCTGCCAAACC/GGTTTGGCAGC-3	5-KYTGCCARACN/NGTYTGGCARM-3
motif1496	phiAP3|ATTACCTGH|M05520	E4F1	0	0	1	5-ATTACCTGT/ACAGGTAAT-3	5-ATTACCTGH/DCAGGTAAT-3
motif1497	ZER6|SSTTTTCGTTTGAGGC|M05521	ZNF398	0	0	1	5-CCTTTTCGTTTGAGGC/GCCTCAAACGAAAAGG-3	5-SSTTTTCGTTTGAGGC/GCCTCAAACGAAAASS-3
motif1498	ZNF341|TGGGGGGGGGG|M05522	ZNF341	0	0	1	5-TGGGGGGGGGG/CCCCCCCCCCA-3	5-TGGGGGGGGGG/CCCCCCCCCCA-3
motif1499	ZBTB46|CTATCCCCC|M05523	ZBTB46	0	0	1	5-CTATCCCCC/GGGGGATAG-3	5-CTATCCCCC/GGGGGATAG-3
motif1500	ZBTB41|TCGGGGGCCCA|M05525	ZBTB41	0	0	1	5-TCGGGGGCCCA/TGGGCCCCCGA-3	5-TCGGGGGCCCA/TGGGCCCCCGA-3
motif1501	Zfp526|AAACGCCAACC|M05526	ZNF526	0	0	1	5-AAACGCCAACC/GGTTGGCGTTT-3	5-AAACGCCAACC/GGTTGGCGTTT-3
motif1502	Zfp526|GYGCCACACCC|M05527	ZNF526	0	0	1	5-GTGCCACACCC/GGGTGTGGCAC-3	5-GYGCCACACCC/GGGTGTGGCRC-3
motif1503	ZAC|ATSCCCAWCM|M05528	PLAGL1	0	1	1	5-ATCCCCAACC/GGTTGGGGAT-3	5-ATSCCCAWCM/KGWTGGGSAT-3
motif1504	Zbtb5|CRRDAGGAGC|M05529	ZBTB5	0	0	1	5-CAGAAGGAGC/GCTCCTTCTG-3	5-CRRDAGGAGC/GCTCCTHYYG-3
motif1505	Zscan12|GAGGTTACACG|M05530	ZSCAN12	0	0	1	5-GAGGTTACACG/CGTGTAACCTC-3	5-GAGGTTACACG/CGTGTAACCTC-3
motif1506	ikzf5|ACWAATASCGTTTC|M05531	IKZF5	0	0	1	5-ACTAATACCGTTTC/GAAACGGTATTAGT-3	5-ACWAATASCGTTTC/GAAACGSTATTWGT-3
motif1507	REST|GTTASGCC|M05532	REST	0	0	1	5-GTTACGCC/GGCGTAAC-3	5-GTTASGCC/GGCSTAAC-3
motif1508	SZF1|BGKAGCACAGNC|M05533	ZNF589	0	0	1	5-CGGAGCACAGCC/GGCTGTGCTCCG-3	5-BGKAGCACAGNC/GNCTGTGCTMCV-3
motif1509	PRDM14|TGDCTGGAAGM|M05534	PRDM14	0	0	1	5-TGTCTGGAAGC/GCTTCCAGACA-3	5-TGDCTGGAAGM/KCTTCCAGHCA-3
motif1510	ZNF513|WATTTACCMC|M05535	ZNF513	0	0	1	5-TATTTACCCC/GGGGTAAATA-3	5-WATTTACCMC/GKGGTAAATW-3
motif1511	ZNF777|TCWGCMGKCCC|M05536	ZNF777	0	0	1	5-TCTGCCGTCCC/GGGACGGCAGA-3	5-TCWGCMGKCCC/GGGMCKGCWGA-3
motif1513	Osr2|GCTTTCGCAY|M05539	OSR2	0	0	1	5-GCTTTCGCAC/GTGCGAAAGC-3	5-GCTTTCGCAY/RTGCGAAAGC-3
motif1514	ZBTB34|ATATYCCTATH|M05540	ZBTB34	0	0	1	5-ATATCCCTATC/GATAGGGATAT-3	5-ATATYCCTATH/DATAGGRATAT-3
motif1516	SNAP190|TAATACNSAAG|M05542	SNAPC4	0	0	1	5-TAATACGCAAG/CTTGCGTATTA-3	5-TAATACNSAAG/CTTSNGTATTA-3
motif1517	Zscan12|ATTATGGM|M05543	ZSCAN12	0	0	1	5-ATTATGGA/TCCATAAT-3	5-ATTATGGM/KCCATAAT-3
motif1518	BCL-11A|TCCKTASG|M05544	BCL11A	0	0	1	5-TCCTTACG/CGTAAGGA-3	5-TCCKTASG/CSTAMGGA-3
motif1520	ZAC|YKGCCCH|M05547	PLAGL1	4	4	1	5-CGGCCCC/GGGGCCG-3	5-YKGCCCH/DGGGCMR-3
motif1522	Zfp536|TTCATAAATAATTATGAC|M05549	ZNF536	0	0	1	5-TTCATAAATAATTATGAC/GTCATAATTATTTATGAA-3	5-TTCATAAATAATTATGAC/GTCATAATTATTTATGAA-3
motif1524	Klf8|CAGGCGKGCC|M05551	KLF8	0	0	1	5-CAGGCGGGCC/GGCCCGCCTG-3	5-CAGGCGKGCC/GGCMCGCCTG-3
motif1525	Osx|NGGGCGGGTS|M05554	MID1	0	0	1	5-AGGGCGGGTC/GACCCGCCCT-3	5-NGGGCGGGTS/SACCCGCCCN-3
motif1526	ZNF784|TTTCTTTATASW|M05556	ZNF784	0	0	1	5-TTTCTTTATAGT/ACTATAAAGAAA-3	5-TTTCTTTATASW/WSTATAAAGAAA-3
motif1527	BTEB3|WGGGCGGGTG|M05557	KLF13	0	0	1	5-AGGGCGGGTG/CACCCGCCCT-3	5-WGGGCGGGTG/CACCCGCCCW-3
motif1528	Prdm5|KGTMTTRCMCA|M05558	PRDM5	0	0	1	5-GGTCTTGCCCA/TGGGCAAGACC-3	5-KGTMTTRCMCA/TGKGYAAKACM-3
motif1529	aebp2|RTGAGGTCCRCCCC|M05560	AEBP2	0	0	1	5-ATGAGGTCCACCCC/GGGGTGGACCTCAT-3	5-RTGAGGTCCRCCCC/GGGGYGGACCTCAY-3
motif1530	hic2|AAAATCGTTTCG|M05561	HIC2	0	0	1	5-AAAATCGTTTCG/CGAAACGATTTT-3	5-AAAATCGTTTCG/CGAAACGATTTT-3
motif1531	Zfp579|NTTTTTYGGCACAG|M05562	ZNF579	0	0	1	5-TTTTTTCGGCACAG/CTGTGCCGAAAAAA-3	5-NTTTTTYGGCACAG/CTGTGCCRAAAAAN-3
motif1532	ZNF691|GGTCCGGCGGM|M05563	ZNF691	0	0	1	5-GGTCCGGCGGC/GCCGCCGGACC-3	5-GGTCCGGCGGM/KCCGCCGGACC-3
motif1533	ZNF772|CGTCCATCGGG|M05564	ZNF772	0	0	1	5-CGTCCATCGGG/CCCGATGGACG-3	5-CGTCCATCGGG/CCCGATGGACG-3
motif1534	ZNF772|TMTGGCATACC|M05565	ZNF772	0	0	1	5-TATGGCATACC/GGTATGCCATA-3	5-TMTGGCATACC/GGTATGCCAKA-3
motif1535	ZNF498|GCGTTGTTGAMCCCGTCC|M05566	ZSCAN25	0	0	1	5-GCGTTGTTGAACCCGTCC/GGACGGGTTCAACAACGC-3	5-GCGTTGTTGAMCCCGTCC/GGACGGGKTCAACAACGC-3
motif1536	ovol1|AGAGTCATGTMGC|M05567	OVOL1	0	0	1	5-AGAGTCATGTCGC/GCGACATGACTCT-3	5-AGAGTCATGTMGC/GCKACATGACTCT-3
motif1537	FIZ1|KGAAATCTGGCCCC|M05568	FIZ1	0	0	1	5-TGAAATCTGGCCCC/GGGGCCAGATTTCA-3	5-KGAAATCTGGCCCC/GGGGCCAGATTTCM-3
motif1538	ZNF366|NATTAATTCTGG|M05571	ZNF366	0	0	1	5-GATTAATTCTGG/CCAGAATTAATC-3	5-NATTAATTCTGG/CCAGAATTAATN-3
motif1539	ZFP91|GTATAGCCCGCYTC|M05572	ZFP91	0	0	1	5-GTATAGCCCGCCTC/GAGGCGGGCTATAC-3	5-GTATAGCCCGCYTC/GARGCGGGCTATAC-3
motif1540	ZNF213|ATGCCTRCMGM|M05573	ZNF213	0	0	1	5-ATGCCTACCGC/GCGGTAGGCAT-3	5-ATGCCTRCMGM/KCKGYAGGCAT-3
motif1541	ZFP92|GACGCCKTCCC|M05574	ZFP92	0	0	1	5-GACGCCTTCCC/GGGAAGGCGTC-3	5-GACGCCKTCCC/GGGAMGGCGTC-3
motif1542	znf426|AATGTTTCCTC|M05575	ZNF426	0	0	1	5-AATGTTTCCTC/GAGGAAACATT-3	5-AATGTTTCCTC/GAGGAAACATT-3
motif1543	ZFP92|CGATAAAATGM|M05576	ZFP92	0	0	1	5-CGATAAAATGC/GCATTTTATCG-3	5-CGATAAAATGM/KCATTTTATCG-3
motif1544	Zfp579|CGCCGAATCCCCCC|M05577	ZNF579	0	0	1	5-CGCCGAATCCCCCC/GGGGGGATTCGGCG-3	5-CGCCGAATCCCCCC/GGGGGGATTCGGCG-3
motif1545	Zfp579|GKCTKGSGGGD|M05579	ZNF579	0	0	1	5-GTCTGGCGGGT/ACCCGCCAGAC-3	5-GKCTKGSGGGD/HCCCSCMAGMC-3
motif1546	Zfp92|TKAAGACGKDAACGG|M05580	ZFP92	0	0	1	5-TGAAGACGGTAACGG/CCGTTACCGTCTTCA-3	5-TKAAGACGKDAACGG/CCGTTHMCGTCTTMA-3
motif1547	znf426|CCTYCCAMCC|M05581	ZNF426	0	1	1	5-CCTTCCAACC/GGTTGGAAGG-3	5-CCTYCCAMCC/GGKTGGRAGG-3
motif1548	znf426|TCGKTWCCACC|M05582	ZNF426	0	0	1	5-TCGGTACCACC/GGTGGTACCGA-3	5-TCGKTWCCACC/GGTGGWAMCGA-3
motif1549	ZNF793|TRACACKGTAATTGGCTKTCT|M05583	ZNF793	0	0	1	5-TAACACTGTAATTGGCTTTCT/AGAAAGCCAATTACAGTGTTA-3	5-TRACACKGTAATTGGCTKTCT/AGAMAGCCAATTACMGTGTYA-3
motif1550	ZNF366|GKACAACCCCWC|M05584	ZNF366	0	0	1	5-GGACAACCCCAC/GTGGGGTTGTCC-3	5-GKACAACCCCWC/GWGGGGTTGTMC-3
motif1551	hic2|CTAAGCGTGGATGGCCG|M05585	HIC2	0	0	1	5-CTAAGCGTGGATGGCCG/CGGCCATCCACGCTTAG-3	5-CTAAGCGTGGATGGCCG/CGGCCATCCACGCTTAG-3
motif1552	Zfp652|CAATCACRC|M05586	ZNF652	0	0	1	5-CAATCACAC/GTGTGATTG-3	5-CAATCACRC/GYGTGATTG-3
motif1553	Zkscan6|KCTTTARCCMR|M05587	ZNF18	0	0	1	5-GCTTTAGCCCG/CGGGCTAAAGC-3	5-KCTTTARCCMR/YKGGYTAAAGM-3
motif1554	ZNF18|KCTTYWGCCMN|M05588	ZNF18	0	1	1	5-GCTTTAGCCCG/CGGGCTAAAGC-3	5-KCTTYWGCCMN/NKGGCWRAAGM-3
motif1555	ZNF772|GTAATGGCTA|M05590	ZNF772	0	0	1	5-GTAATGGCTA/TAGCCATTAC-3	5-GTAATGGCTA/TAGCCATTAC-3
motif1556	ZNF215|GAGNATGCGGM|M05591	ZNF215	0	0	1	5-GAGAATGCGGA/TCCGCATTCTC-3	5-GAGNATGCGGM/KCCGCATNCTC-3
motif1557	FIZ1|TGTGTGASGAAKC|M05592	FIZ1	0	0	1	5-TGTGTGACGAATC/GATTCGTCACACA-3	5-TGTGTGASGAAKC/GMTTCSTCACACA-3
motif1558	Staf|GTTTACAAANG|M05594	ZNF143	0	0	1	5-GTTTACAAACG/CGTTTGTAAAC-3	5-GTTTACAAANG/CNTTTGTAAAC-3
motif1559	Zfp513|RTRACGAKGGKA|M05595	ZNF513	0	0	1	5-ATGACGATGGTA/TACCATCGTCAT-3	5-RTRACGAKGGKA/TMCCMTCGTYAY-3
motif1560	Staf|AMAGTACMTTGGAAACKC|M05596	ZNF143	0	0	1	5-AAAGTACCTTGGAAACGC/GCGTTTCCAAGGTACTTT-3	5-AMAGTACMTTGGAAACKC/GMGTTTCCAAKGTACTKT-3
motif1561	ZNF174|KGTAAAGCGGA|M05597	ZNF174	0	0	1	5-TGTAAAGCGGA/TCCGCTTTACA-3	5-KGTAAAGCGGA/TCCGCTTTACM-3
motif1562	Aiolos|GCTTAGTCN|M05600	IKZF3	0	1	1	5-GCTTAGTCC/GGACTAAGC-3	5-GCTTAGTCN/NGACTAAGC-3
motif1563	FIZ1|AGGCCKASCMC|M05601	FIZ1	0	0	1	5-AGGCCGACCCC/GGGGTCGGCCT-3	5-AGGCCKASCMC/GKGSTMGGCCT-3
motif1564	REX-1|GCAAAATGGTGMY|M05602	ZFP42	0	0	1	5-GCAAAATGGTGAC/GTCACCATTTTGC-3	5-GCAAAATGGTGMY/RKCACCATTTTGC-3
motif1565	Staf|AAWCCACGAGG|M05604	ZNF143	0	0	1	5-AAACCACGAGG/CCTCGTGGTTT-3	5-AAWCCACGAGG/CCTCGTGGWTT-3
motif1566	GATA-6|TTTTTTTAWGWTAAACA|M05605	GATA6	0	0	1	5-TTTTTTTAAGATAAACA/TGTTTATCTTAAAAAAA-3	5-TTTTTTTAWGWTAAACA/TGTTTAWCWTAAAAAAA-3
motif1567	ZNF691|AGGCCAGCCGC|M05606	ZNF691	0	0	1	5-AGGCCAGCCGC/GCGGCTGGCCT-3	5-AGGCCAGCCGC/GCGGCTGGCCT-3
motif1568	A-Myb|AWMKCCGTTACN|M05607	MYBL1	0	0	1	5-AAATCCGTTACT/AGTAACGGATTT-3	5-AWMKCCGTTACN/NGTAACGGMKWT-3
motif1570	YY2|ARCTAAATGGTGATC|M05610	YY2	0	0	1	5-AACTAAATGGTGATC/GATCACCATTTAGTT-3	5-ARCTAAATGGTGATC/GATCACCATTTAGYT-3
motif1571	SALL3|MTTCAGACTCG|M05611	SALL3	0	0	1	5-ATTCAGACTCG/CGAGTCTGAAT-3	5-MTTCAGACTCG/CGAGTCTGAAK-3
motif1572	ZNF189|GGMTGGAATGGGGASSGR|M05612	ZNF189	0	0	1	5-GGCTGGAATGGGGAGGGA/TCCCTCCCCATTCCAGCC-3	5-GGMTGGAATGGGGASSGR/YCSSTCCCCATTCCAKCC-3
motif1573	ZNF35|TCTGATATACC|M05613	ZNF35	0	0	1	5-TCTGATATACC/GGTATATCAGA-3	5-TCTGATATACC/GGTATATCAGA-3
motif1574	ZNF883|GATTTCAGACC|M05614	ZNF883	0	0	1	5-GATTTCAGACC/GGTCTGAAATC-3	5-GATTTCAGACC/GGTCTGAAATC-3
motif1575	MKR2|TATGCCAMAC|M05615	ZFP2	0	0	1	5-TATGCCACAC/GTGTGGCATA-3	5-TATGCCAMAC/GTKTGGCATA-3
motif1576	ZNF73|TMTGATCCAAN|M05616	ZNF73	0	0	1	5-TCTGATCCAAG/CTTGGATCAGA-3	5-TMTGATCCAAN/NTTGGATCAKA-3
motif1577	ZNF500|GTTCCGGGGRW|M05617	ZNF500	0	0	1	5-GTTCCGGGGAT/ATCCCCGGAAC-3	5-GTTCCGGGGRW/WYCCCCGGAAC-3
motif1578	ZSCAN5C|MSTTWAACATG|M05619	ZSCAN5C	0	0	1	5-AGTTTAACATG/CATGTTAAACT-3	5-MSTTWAACATG/CATGTTWAASK-3
motif1579	ZNF73|GTTACWACCGA|M05621	ZNF73	0	0	1	5-GTTACAACCGA/TCGGTTGTAAC-3	5-GTTACWACCGA/TCGGTWGTAAC-3
motif1580	HKR1|TYCSCACNWC|M05622	HKR1	0	0	1	5-TCCGCACCTC/GAGGTGCGGA-3	5-TYCSCACNWC/GWNGTGSGRA-3
motif1582	PRD51|GATTCAGCCCCN|M05624	ZSCAN9	0	0	1	5-GATTCAGCCCCA/TGGGGCTGAATC-3	5-GATTCAGCCCCN/NGGGGCTGAATC-3
motif1583	MKR2|YCCRYVATGGCCCCCCCC|M05625	ZFP2	0	0	1	5-TCCATCATGGCCCCCCCC/GGGGGGGGCCATGATGGA-3	5-YCCRYVATGGCCCCCCCC/GGGGGGGGCCATBRYGGR-3
motif1584	ZNF780A|CMWKMTGTACCM|M05626	ZNF780A	0	0	1	5-CAAGCTGTACCC/GGGTACAGCTTG-3	5-CMWKMTGTACCM/KGGTACAKMWKG-3
motif1585	ZNF320|TTCGTAKCGCMCCCCGHA|M05627	ZNF320	0	0	1	5-TTCGTATCGCACCCCGAA/TTCGGGGTGCGATACGAA-3	5-TTCGTAKCGCMCCCCGHA/TDCGGGGKGCGMTACGAA-3
motif1586	ZNF735|GGTCCGGCCSC|M05628	ZNF735	0	0	1	5-GGTCCGGCCCC/GGGGCCGGACC-3	5-GGTCCGGCCSC/GSGGCCGGACC-3
motif1587	ZNF44|GATSGRGCCSC|M05629	ZNF44	0	0	1	5-GATCGAGCCCC/GGGGCTCGATC-3	5-GATSGRGCCSC/GSGGCYCSATC-3
motif1588	ZNF785|GAGGAATGWTTTATCMCCGC|M05630	ZNF785	0	0	1	5-GAGGAATGATTTATCCCCGC/GCGGGGATAAATCATTCCTC-3	5-GAGGAATGWTTTATCMCCGC/GCGGKGATAAAWCATTCCTC-3
motif1589	ZNF210|TCTGCCCTAMC|M05631	ZNF205	0	0	1	5-TCTGCCCTACC/GGTAGGGCAGA-3	5-TCTGCCCTAMC/GKTAGGGCAGA-3
motif1590	ZNF286B|TYTTTCWAARC|M05632	ZNF286B	0	0	1	5-TTTTTCAAAGC/GCTTTGAAAAA-3	5-TYTTTCWAARC/GYTTWGAAARA-3
motif1591	ZFP932|TCGGCATGACC|M05633	ZNF124	0	0	1	5-TCGGCATGACC/GGTCATGCCGA-3	5-TCGGCATGACC/GGTCATGCCGA-3
motif1592	ZNF320|TATTCTTTCCC|M05634	ZNF320	0	0	1	5-TATTCTTTCCC/GGGAAAGAATA-3	5-TATTCTTTCCC/GGGAAAGAATA-3
motif1594	Zfy1|ATGAAGAAKACCNGTGGST|M05636	ZFY	0	0	1	5-ATGAAGAAGACCGGTGGCT/AGCCACCGGTCTTCTTCAT-3	5-ATGAAGAAKACCNGTGGST/ASCCACNGGTMTTCTTCAT-3
motif1595	ZNF189|RATCCCSCAAC|M05637	ZNF189	0	0	1	5-AATCCCCCAAC/GTTGGGGGATT-3	5-RATCCCSCAAC/GTTGSGGGATY-3
motif1596	ZNF736|TCAACTGGACC|M05638	ZNF736	0	0	1	5-TCAACTGGACC/GGTCCAGTTGA-3	5-TCAACTGGACC/GGTCCAGTTGA-3
motif1597	ZNF883|NATGCCCACCA|M05639	ZNF883	0	0	1	5-TATGCCCACCA/TGGTGGGCATA-3	5-NATGCCCACCA/TGGTGGGCATN-3
motif1598	ZNF735|TCTGCTGCCM|M05640	ZNF735	0	1	1	5-TCTGCTGCCA/TGGCAGCAGA-3	5-TCTGCTGCCM/KGGCAGCAGA-3
motif1599	ZFP932|TYTYTTCGACM|M05641	ZNF124	0	0	1	5-TCTCTTCGACC/GGTCGAAGAGA-3	5-TYTYTTCGACM/KGTCGAARARA-3
motif1600	ZNF879|TATCCGACG|M05642	ZNF879	0	0	1	5-TATCCGACG/CGTCGGATA-3	5-TATCCGACG/CGTCGGATA-3
motif1601	ZNF879|TCTAAMCSACC|M05643	ZNF879	0	0	1	5-TCTAAACGACC/GGTCGTTTAGA-3	5-TCTAAMCSACC/GGTSGKTTAGA-3
motif1602	ZNF736|TGSAGCATC|M05645	ZNF736	0	1	1	5-TGCAGCATC/GATGCTGCA-3	5-TGSAGCATC/GATGCTSCA-3
motif1603	ZNF879|KMTAATGGAAC|M05646	ZNF879	0	0	1	5-TATAATGGAAC/GTTCCATTATA-3	5-KMTAATGGAAC/GTTCCATTAKM-3
motif1604	HKR1|GCTTTTTCACC|M05647	HKR1	0	0	1	5-GCTTTTTCACC/GGTGAAAAAGC-3	5-GCTTTTTCACC/GGTGAAAAAGC-3
motif1605	ZNF883|GTGGCTGCCTC|M05648	ZNF883	0	0	1	5-GTGGCTGCCTC/GAGGCAGCCAC-3	5-GTGGCTGCCTC/GAGGCAGCCAC-3
motif1606	ZNF44|WTTTCTAACCV|M05650	ZNF44	0	0	1	5-ATTTCTAACCC/GGGTTAGAAAT-3	5-WTTTCTAACCV/BGGTTAGAAAW-3
motif1607	ZNF44|GGTTGTGGCGA|M05651	ZNF44	0	0	1	5-GGTTGTGGCGA/TCGCCACAACC-3	5-GGTTGTGGCGA/TCGCCACAACC-3
motif1608	Zfy1|GTGGCATCCCM|M05653	ZFY	0	0	1	5-GTGGCATCCCC/GGGGATGCCAC-3	5-GTGGCATCCCM/KGGGATGCCAC-3
motif1609	ZNF189|KCCGATTGCCC|M05654	ZNF189	0	0	1	5-GCCGATTGCCC/GGGCAATCGGC-3	5-KCCGATTGCCC/GGGCAATCGGM-3
motif1610	ZNF705G|TASACGAGAWGGTC|M05655	ZNF705G	0	0	1	5-TAGACGAGAAGGTC/GACCTTCTCGTCTA-3	5-TASACGAGAWGGTC/GACCWTCTCGTSTA-3
motif1611	ZFP932|AAATCCCCCYC|M05656	ZNF124	0	0	1	5-AAATCCCCCCC/GGGGGGGATTT-3	5-AAATCCCCCYC/GRGGGGGATTT-3
motif1612	MKR2|TATYCCCGWGG|M05657	ZFP2	0	0	1	5-TATCCCCGAGG/CCTCGGGGATA-3	5-TATYCCCGWGG/CCWCGGGRATA-3
motif1613	ZNF780A|KMCTAAKCCAC|M05658	ZNF780A	0	0	1	5-GCCTAATCCAC/GTGGATTAGGC-3	5-KMCTAAKCCAC/GTGGMTTAGKM-3
motif1614	ZNF879|KMTTATAAACC|M05659	ZNF879	0	0	1	5-TCTTATAAACC/GGTTTATAAGA-3	5-KMTTATAAACC/GGTTTATAAKM-3
motif1616	ZNF450|AGGGCCYGCKC|M05663	ZBTB24	0	0	1	5-AGGGCCCGCTC/GAGCGGGCCCT-3	5-AGGGCCYGCKC/GMGCRGGCCCT-3
motif1617	ZNF853|TTTAGGMCCN|M05664	ZNF853	0	0	1	5-TTTAGGACCA/TGGTCCTAAA-3	5-TTTAGGMCCN/NGGKCCTAAA-3
motif1618	Sp3|AGGGCGG|M05665	SP3	0	1	1	5-AGGGCGG/CCGCCCT-3	5-AGGGCGG/CCGCCCT-3
motif1619	ZNF286B|KCTTTCTCAMC|M05666	ZNF286B	0	0	1	5-GCTTTCTCAAC/GTTGAGAAAGC-3	5-KCTTTCTCAMC/GKTGAGAAAGM-3
motif1620	ZNF35|TGTAAAAAGGM|M05667	ZNF35	0	0	1	5-TGTAAAAAGGC/GCCTTTTTACA-3	5-TGTAAAAAGGM/KCCTTTTTACA-3
motif1621	ZNF154|TCTGATTTCAC|M05668	ZNF154	0	0	1	5-TCTGATTTCAC/GTGAAATCAGA-3	5-TCTGATTTCAC/GTGAAATCAGA-3
motif1622	ZNF154|KHTGATTGAGC|M05669	ZNF154	0	0	1	5-GATGATTGAGC/GCTCAATCATC-3	5-KHTGATTGAGC/GCTCAATCADM-3
motif1623	ZNF25|TTKGTTTTCCA|M05671	ZNF25	0	0	1	5-TTGGTTTTCCA/TGGAAAACCAA-3	5-TTKGTTTTCCA/TGGAAAACMAA-3
motif1624	ZNF133|TCTTTTTCAYT|M05672	ZNF133	0	1	1	5-TCTTTTTCATT/AATGAAAAAGA-3	5-TCTTTTTCAYT/ARTGAAAAAGA-3
motif1625	znf136|AGGYTTGAAACCTCTKCCS|M05673	ZNF136	0	0	1	5-AGGCTTGAAACCTCTGCCG/CGGCAGAGGTTTCAAGCCT-3	5-AGGYTTGAAACCTCTKCCS/SGGMAGAGGTTTCAARCCT-3
motif1626	ZNF235|KATCTTTAACC|M05674	ZNF235	0	0	1	5-TATCTTTAACC/GGTTAAAGATA-3	5-KATCTTTAACC/GGTTAAAGATM-3
motif1627	ZNF31|HGTAAAAGGGA|M05675	ZSCAN20	0	0	1	5-CGTAAAAGGGA/TCCCTTTTACG-3	5-HGTAAAAGGGA/TCCCTTTTACD-3
motif1629	ZNF816A|KCCKTTTTCCC|M05677	ZNF816	0	0	1	5-TCCTTTTTCCC/GGGAAAAAGGA-3	5-KCCKTTTTCCC/GGGAAAAMGGM-3
motif1630	ZNF816A|TATTATTCCWG|M05678	ZNF816	0	0	1	5-TATTATTCCAG/CTGGAATAATA-3	5-TATTATTCCWG/CWGGAATAATA-3
motif1631	ZNF816A|TCTGRCCCCCC|M05679	ZNF816	0	0	1	5-TCTGGCCCCCC/GGGGGGCCAGA-3	5-TCTGRCCCCCC/GGGGGGYCAGA-3
motif1632	ZNF80|WCCCCAGCCCA|M05680	ZNF80	0	0	1	5-TCCCCAGCCCA/TGGGCTGGGGA-3	5-WCCCCAGCCCA/TGGGCTGGGGW-3
motif1633	ZNF200|GGTAAAACCGA|M05681	ZNF200	0	0	1	5-GGTAAAACCGA/TCGGTTTTACC-3	5-GGTAAAACCGA/TCGGTTTTACC-3
motif1634	ZNF25|TGTACGRCTRM|M05682	ZNF25	0	0	1	5-TGTACGGCTAC/GTAGCCGTACA-3	5-TGTACGRCTRM/KYAGYCGTACA-3
motif1635	SUHW1|TCTATTGGCTC|M05683	ZNF280A	0	0	1	5-TCTATTGGCTC/GAGCCAATAGA-3	5-TCTATTGGCTC/GAGCCAATAGA-3
motif1636	ZNF30|GATTAAACRTCCGCTGTC|M05684	ZNF30	0	0	1	5-GATTAAACGTCCGCTGTC/GACAGCGGACGTTTAATC-3	5-GATTAAACRTCCGCTGTC/GACAGCGGAYGTTTAATC-3
motif1637	ZNF141|GAAGKTTTCCC|M05686	ZNF141	0	0	1	5-GAAGTTTTCCC/GGGAAAACTTC-3	5-GAAGKTTTCCC/GGGAAAMCTTC-3
motif1638	ZNF133|GNTWTTTTTCC|M05688	ZNF133	0	1	1	5-GATTTTTTTCC/GGAAAAAAATC-3	5-GNTWTTTTTCC/GGAAAAAWANC-3
motif1639	Zfp41|GATAAGGCTRM|M05689	ZFP41	0	0	1	5-GATAAGGCTGC/GCAGCCTTATC-3	5-GATAAGGCTRM/KYAGCCTTATC-3
motif1640	ZNF-20|GAATTTACCGA|M05690	ZNF20	0	0	1	5-GAATTTACCGA/TCGGTAAATTC-3	5-GAATTTACCGA/TCGGTAAATTC-3
motif1641	Zipro1|KATGCAGCACT|M05692	ZSCAN21	0	0	1	5-GATGCAGCACT/AGTGCTGCATC-3	5-KATGCAGCACT/AGTGCTGCATM-3
motif1642	ZNF30|TGTCMATCGGM|M05693	ZNF30	0	0	1	5-TGTCCATCGGC/GCCGATGGACA-3	5-TGTCMATCGGM/KCCGATKGACA-3
motif1643	ZNF80|TCRGTCGCCCC|M05694	ZNF80	0	0	1	5-TCGGTCGCCCC/GGGGCGACCGA-3	5-TCRGTCGCCCC/GGGGCGACYGA-3
motif1644	ZNF235|GCRKTTWGCGG|M05697	ZNF235	0	0	1	5-GCATTTTGCGG/CCGCAAAATGC-3	5-GCRKTTWGCGG/CCGCWAAMYGC-3
motif1645	ZNF141|CTGTACTCAC|M05698	ZNF141	0	0	1	5-CTGTACTCAC/GTGAGTACAG-3	5-CTGTACTCAC/GTGAGTACAG-3
motif1646	ZNF816A|TGTTATTRWGC|M05699	ZNF816	0	0	1	5-TGTTATTGAGC/GCTCAATAACA-3	5-TGTTATTRWGC/GCWYAATAACA-3
motif1647	ZNF19|GCAGCAGCCCC|M05700	ZNF19	0	0	1	5-GCAGCAGCCCC/GGGGCTGCTGC-3	5-GCAGCAGCCCC/GGGGCTGCTGC-3
motif1648	ZNF30|DCKGGTMCCAC|M05701	ZNF30	0	0	1	5-GCGGGTCCCAC/GTGGGACCCGC-3	5-DCKGGTMCCAC/GTGGKACCMGH-3
motif1649	ZNF-20|TGATTTSTACCM|M05702	ZNF20	0	0	1	5-TGATTTGTACCA/TGGTACAAATCA-3	5-TGATTTSTACCM/KGGTASAAATCA-3
motif1650	ZNF133|GGTTAAACVSM|M05704	ZNF133	0	0	1	5-GGTTAAACCGC/GCGGTTTAACC-3	5-GGTTAAACVSM/KSBGTTTAACC-3
motif1651	MOK-2|GTAAAGGAKA|M05705	ZNF239	0	0	1	5-GTAAAGGAGA/TCTCCTTTAC-3	5-GTAAAGGAKA/TMTCCTTTAC-3
motif1652	ZNF-20|AATTCTGGTCCM|M05706	ZNF20	0	0	1	5-AATTCTGGTCCA/TGGACCAGAATT-3	5-AATTCTGGTCCM/KGGACCAGAATT-3
motif1653	MOK-2|TCTTTTTGAGB|M05707	ZNF239	0	0	1	5-TCTTTTTGAGG/CCTCAAAAAGA-3	5-TCTTTTTGAGB/VCTCAAAAAGA-3
motif1654	znf136|GTYGARNAGMCGGCCC|M05708	ZNF136	0	0	1	5-GTCGAATAGACGGCCC/GGGCCGTCTATTCGAC-3	5-GTYGARNAGMCGGCCC/GGGCCGKCTNYTCRAC-3
motif1655	znf136|TCTCTWCRWYC|M05709	ZNF136	0	0	1	5-TCTCTTCGACC/GGTCGAAGAGA-3	5-TCTCTWCRWYC/GRWYGWAGAGA-3
motif1656	ZFX|GGTAMAGWCTGCCGAAGGCT|M05710	ZFX	0	0	1	5-GGTACAGTCTGCCGAAGGCT/AGCCTTCGGCAGACTGTACC-3	5-GGTAMAGWCTGCCGAAGGCT/AGCCTTCGGCAGWCTKTACC-3
motif1657	ZNF37A|TNTWCCGGAAC|M05711	ZNF37A	0	0	1	5-TGTACCGGAAC/GTTCCGGTACA-3	5-TNTWCCGGAAC/GTTCCGGWANA-3
motif1658	ZNF134|KCCGCCGCCCC|M05712	ZNF134	0	0	1	5-TCCGCCGCCCC/GGGGCGGCGGA-3	5-KCCGCCGCCCC/GGGGCGGCGGM-3
motif1659	Evi-1|DAGTTKKGACC|M05714	RUNX1	0	0	1	5-GAGTTGGGACC/GGTCCCAACTC-3	5-DAGTTKKGACC/GGTCMMAACTH-3
motif1660	ZNF133|TTTTTTTTACC|M05715	ZNF133	0	0	1	5-TTTTTTTTACC/GGTAAAAAAAA-3	5-TTTTTTTTACC/GGTAAAAAAAA-3
motif1661	Zfy2|GATTAAAAAGTGGGGCCCY|M05717	ZFY	0	0	1	5-GATTAAAAAGTGGGGCCCC/GGGGCCCCACTTTTTAATC-3	5-GATTAAAAAGTGGGGCCCY/RGGGCCCCACTTTTTAATC-3
motif1662	ZNF30|GYRTCTTAACC|M05718	ZNF30	0	0	1	5-GCATCTTAACC/GGTTAAGATGC-3	5-GYRTCTTAACC/GGTTAAGAYRC-3
motif1663	Zfp367|GATRTTTGCC|M05719	ZNF367	0	0	1	5-GATGTTTGCC/GGCAAACATC-3	5-GATRTTTGCC/GGCAAAYATC-3
motif1664	ZNF134|GAAKACGGGGTCGGC|M05720	ZNF134	0	0	1	5-GAAGACGGGGTCGGC/GCCGACCCCGTCTTC-3	5-GAAKACGGGGTCGGC/GCCGACCCCGTMTTC-3
motif1665	ZNF235|KCTCYCGAMRG|M05721	ZNF235	0	0	1	5-TCTCTCGACGG/CCGTCGAGAGA-3	5-KCTCYCGAMRG/CYKTCGRGAGM-3
motif1666	znf8|ATACCTTAACC|M05722	ZNF8	0	0	1	5-ATACCTTAACC/GGTTAAGGTAT-3	5-ATACCTTAACC/GGTTAAGGTAT-3
motif1667	ZNF19|GCAGTTTCCCA|M05723	ZNF19	0	0	1	5-GCAGTTTCCCA/TGGGAAACTGC-3	5-GCAGTTTCCCA/TGGGAAACTGC-3
motif1668	Zipro1|AGTCGTCM|M05724	ZSCAN21	0	0	1	5-AGTCGTCA/TGACGACT-3	5-AGTCGTCM/KGACGACT-3
motif1669	ZNF792|GYATAMGGAACCCATC|M05726	ZNF792	0	0	1	5-GCATACGGAACCCATC/GATGGGTTCCGTATGC-3	5-GYATAMGGAACCCATC/GATGGGTTCCKTATRC-3
motif1670	ZNF776|KCTGACATGGRG|M05729	ZNF776	0	0	1	5-TCTGACATGGGG/CCCCATGTCAGA-3	5-KCTGACATGGRG/CYCCATGTCAGM-3
motif1671	ZNF630|TTTCTTTTAYS|M05730	ZNF630	0	0	1	5-TTTCTTTTATC/GATAAAAGAAA-3	5-TTTCTTTTAYS/SRTAAAAGAAA-3
motif1672	ZNF660|KSGTTCCCCCC|M05731	ZNF660	0	0	1	5-GCGTTCCCCCC/GGGGGGAACGC-3	5-KSGTTCCCCCC/GGGGGGAACSM-3
motif1673	Zfp697|KGKGCGAGGGM|M05733	ZNF697	0	0	1	5-TGGGCGAGGGA/TCCCTCGCCCA-3	5-KGKGCGAGGGM/KCCCTCGCMCM-3
motif1674	ZNF390|GWTGTTASACG|M05735	ZSCAN23	0	0	1	5-GATGTTACACG/CGTGTAACATC-3	5-GWTGTTASACG/CGTSTAACAWC-3
motif1675	ZNF699|KCACGTGCCAC|M05737	ZNF699	0	0	1	5-GCACGTGCCAC/GTGGCACGTGC-3	5-KCACGTGCCAC/GTGGCACGTGM-3
motif1677	Zfp664|GTTNAATMCGC|M05739	ZNF664	0	0	1	5-GTTCAATCCGC/GCGGATTGAAC-3	5-GTTNAATMCGC/GCGKATTNAAC-3
motif1678	ZNF667|TCCGYAATCCC|M05740	ZNF667	0	0	1	5-TCCGCAATCCC/GGGATTGCGGA-3	5-TCCGYAATCCC/GGGATTRCGGA-3
motif1679	ZNF718|KCTGAWGCCCC|M05741	ZNF718	0	0	1	5-GCTGATGCCCC/GGGGCATCAGC-3	5-KCTGAWGCCCC/GGGGCWTCAGM-3
motif1680	ZNF57|SRAMGGGCAGG|M05742	ZNF57	0	0	1	5-GAAAGGGCAGG/CCTGCCCTTTC-3	5-SRAMGGGCAGG/CCTGCCCKTYS-3
motif1681	ZNF57|GYTAGGGCAGN|M05743	ZNF57	0	0	1	5-GTTAGGGCAGA/TCTGCCCTAAC-3	5-GYTAGGGCAGN/NCTGCCCTARC-3
motif1682	ZXDL|RRKGTTACCAATWCCCABC|M05744	ZXDC	0	0	1	5-GGTGTTACCAATTCCCAGC/GCTGGGAATTGGTAACACC-3	5-RRKGTTACCAATWCCCABC/GVTGGGWATTGGTAACMYY-3
motif1683	ZNF718|KCGCWATYCCC|M05745	ZNF718	0	0	1	5-GCGCAATCCCC/GGGGATTGCGC-3	5-KCGCWATYCCC/GGGRATWGCGM-3
motif1684	Zfp710|BAAATAGGCATGTC|M05746	ZNF710	0	0	1	5-CAAATAGGCATGTC/GACATGCCTATTTG-3	5-BAAATAGGCATGTC/GACATGCCTATTTV-3
motif1685	Zfp697|TGGGCRTCGGC|M05747	ZNF697	0	0	1	5-TGGGCATCGGC/GCCGATGCCCA-3	5-TGGGCRTCGGC/GCCGAYGCCCA-3
motif1686	ZNF470|WWGGATGTMATCACC|M05749	ZNF470	0	0	1	5-ATGGATGTCATCACC/GGTGATGACATCCAT-3	5-WWGGATGTMATCACC/GGTGATKACATCCWW-3
motif1687	ZNFpT1|AWCGACCACM|M05750	ZNF77	0	0	1	5-AACGACCACC/GGTGGTCGTT-3	5-AWCGACCACM/KGTGGTCGWT-3
motif1688	ZNF141|GAATCTCGCAY|M05751	ZNF141	0	0	1	5-GAATCTCGCAC/GTGCGAGATTC-3	5-GAATCTCGCAY/RTGCGAGATTC-3
motif1689	ZNF57|TSMCCACCCCR|M05752	ZNF57	0	0	1	5-TCACCACCCCG/CGGGGTGGTGA-3	5-TSMCCACCCCR/YGGGGTGGKSA-3
motif1690	ZNF630|TTTCTTGACAC|M05753	ZNF630	0	0	1	5-TTTCTTGACAC/GTGTCAAGAAA-3	5-TTTCTTGACAC/GTGTCAAGAAA-3
motif1691	ZNF718|TYTCCTTAAC|M05755	ZNF718	0	0	1	5-TTTCCTTAAC/GTTAAGGAAA-3	5-TYTCCTTAAC/GTTAAGGARA-3
motif1692	ZNF470|TWTMWTAAACA|M05756	ZNF470	0	1	1	5-TTTAATAAACA/TGTTTATTAAA-3	5-TWTMWTAAACA/TGTTTAWKAWA-3
motif1693	ZNF699|TATTTTRATMC|M05758	ZNF699	0	0	1	5-TATTTTAATCC/GGATTAAAATA-3	5-TATTTTRATMC/GKATYAAAATA-3
motif1694	ZNF544|KCCKAAAGMAACCCSC|M05759	ZNF544	0	0	1	5-TCCGAAAGCAACCCGC/GCGGGTTGCTTTCGGA-3	5-KCCKAAAGMAACCCSC/GSGGGTTKCTTTMGGM-3
motif1695	ZNF648|TCAGCAAACCC|M05760	ZNF648	0	0	1	5-TCAGCAAACCC/GGGTTTGCTGA-3	5-TCAGCAAACCC/GGGTTTGCTGA-3
motif1696	ZNF774|TMTGTTGACMA|M05762	ZNF774	0	0	1	5-TATGTTGACAA/TTGTCAACATA-3	5-TMTGTTGACMA/TKGTCAACAKA-3
motif1697	ZNF684|NGGAAWTGCCTC|M05765	ZNF684	0	0	1	5-TGGAATTGCCTC/GAGGCAATTCCA-3	5-NGGAAWTGCCTC/GAGGCAWTTCCN-3
motif1698	ZNF667|GAGTTSAATAAATAGGGT|M05766	ZNF667	0	0	1	5-GAGTTGAATAAATAGGGT/ACCCTATTTATTCAACTC-3	5-GAGTTSAATAAATAGGGT/ACCCTATTTATTSAACTC-3
motif1699	ZNFpT1|GTTTAACAAGA|M05767	ZNF77	0	0	1	5-GTTTAACAAGA/TCTTGTTAAAC-3	5-GTTTAACAAGA/TCTTGTTAAAC-3
motif1700	ZNF544|GTWAAAACGM|M05768	ZNF544	0	0	1	5-GTTAAAACGC/GCGTTTTAAC-3	5-GTWAAAACGM/KCGTTTTWAC-3
motif1701	ZNFpT1|GTWTTTTCGA|M05770	ZNF77	0	0	1	5-GTATTTTCGA/TCGAAAATAC-3	5-GTWTTTTCGA/TCGAAAAWAC-3
motif1702	Zfp553|GATACAGACGA|M05771	ZNF48	0	0	1	5-GATACAGACGA/TCGTCTGTATC-3	5-GATACAGACGA/TCGTCTGTATC-3
motif1703	ZNF792|TCAGCTTGACC|M05772	ZNF792	0	0	1	5-TCAGCTTGACC/GGTCAAGCTGA-3	5-TCAGCTTGACC/GGTCAAGCTGA-3
motif1704	ZNF697|GGTACGAGGGM|M05774	ZNF697	0	0	1	5-GGTACGAGGGC/GCCCTCGTACC-3	5-GGTACGAGGGM/KCCCTCGTACC-3
motif1705	ZNF394|KTTKCTTCACC|M05776	ZNF394	0	0	1	5-TTTTCTTCACC/GGTGAAGAAAA-3	5-KTTKCTTCACC/GGTGAAGMAAM-3
motif1706	ZNF774|TGTGCAAACGM|M05777	ZNF774	0	0	1	5-TGTGCAAACGC/GCGTTTGCACA-3	5-TGTGCAAACGM/KCGTTTGCACA-3
motif1707	ZNF311|TCTTTCWTACY|M05778	ZNF311	0	0	1	5-TCTTTCATACT/AGTATGAAAGA-3	5-TCTTTCWTACY/RGTAWGAAAGA-3
motif1708	ZNF674|YMCCAGYRGTCTGMMCCC|M05779	ZNF674	0	0	1	5-CCCCAGCAGTCTGCACCC/GGGTGCAGACTGCTGGGG-3	5-YMCCAGYRGTCTGMMCCC/GGGKKCAGACYRCTGGKR-3
motif1709	ZNF774|TGTGCAAGAGM|M05780	ZNF774	0	0	1	5-TGTGCAAGAGA/TCTCTTGCACA-3	5-TGTGCAAGAGM/KCTCTTGCACA-3
motif1710	ZNF699|TGWCGGGCAGM|M05781	ZNF699	0	0	1	5-TGTCGGGCAGC/GCTGCCCGACA-3	5-TGWCGGGCAGM/KCTGCCCGWCA-3
motif1711	ZNF324B|ATGYAATGGGM|M05782	ZNF324B	0	0	1	5-ATGCAATGGGC/GCCCATTGCAT-3	5-ATGYAATGGGM/KCCCATTRCAT-3
motif1712	ZNF667|GATAATGSCCC|M05783	ZNF667	0	0	1	5-GATAATGCCCC/GGGGCATTATC-3	5-GATAATGSCCC/GGGSCATTATC-3
motif1713	Zfp553|TYGTCCGCMC|M05785	ZNF48	0	0	1	5-TCGTCCGCCC/GGGCGGACGA-3	5-TYGTCCGCMC/GKGCGGACRA-3
motif1714	ZNF605|TCTGCCKGCAC|M05786	ZNF605	0	0	1	5-TCTGCCTGCAC/GTGCAGGCAGA-3	5-TCTGCCKGCAC/GTGCMGGCAGA-3
motif1715	Zfp775|GTTTAATSASG|M05789	ZNF775	0	1	1	5-GTTTAATGAGG/CCTCATTAAAC-3	5-GTTTAATSASG/CSTSATTAAAC-3
motif1716	Zfp775|GGTTAATSCGG|M05790	ZNF775	0	1	1	5-GGTTAATCCGG/CCGGATTAACC-3	5-GGTTAATSCGG/CCGSATTAACC-3
motif1717	ZNF517|VGYMCCTTBTTTCCGCACM|M05791	ZNF517	0	0	1	5-AGTACCTTTTTTCCGCACC/GGTGCGGAAAAAAGGTACT-3	5-VGYMCCTTBTTTCCGCACM/KGTGCGGAAAVAAGGKRCB-3
motif1718	Zbtb24|TRTKKHKCCCA|M05793	ZBTB24	1	1	1	5-TGTTGAGCCCA/TGGGCTCAACA-3	5-TRTKKHKCCCA/TGGGMDMMAYA-3
motif1719	ZNF621|TACGWCGAACC|M05794	ZNF621	0	0	1	5-TACGTCGAACC/GGTTCGACGTA-3	5-TACGWCGAACC/GGTTCGWCGTA-3
motif1720	ZNF574|ACMTACTCCTTTCCCGCCWC|M05795	ZNF574	0	0	1	5-ACATACTCCTTTCCCGCCAC/GTGGCGGGAAAGGAGTATGT-3	5-ACMTACTCCTTTCCCGCCWC/GWGGCGGGAAAGGAGTAKGT-3
motif1722	ZNF605|TTWTAATACGA|M05799	ZNF605	0	0	1	5-TTTTAATACGA/TCGTATTAAAA-3	5-TTWTAATACGA/TCGTATTAWAA-3
motif1723	ZNF605|TATTCATTCCC|M05800	ZNF605	0	0	1	5-TATTCATTCCC/GGGAATGAATA-3	5-TATTCATTCCC/GGGAATGAATA-3
motif1724	ZNF584|GKTATGGGARM|M05803	ZNF584	0	0	1	5-GTTATGGGAGA/TCTCCCATAAC-3	5-GKTATGGGARM/KYTCCCATAMC-3
motif1725	Zbtb41|TTCCCCCCAAC|M05804	ZBTB41	0	0	1	5-TTCCCCCCAAC/GTTGGGGGGAA-3	5-TTCCCCCCAAC/GTTGGGGGGAA-3
motif1726	ZNF546|AAAGGCGCTGAC|M05805	ZNF546	0	0	1	5-AAAGGCGCTGAC/GTCAGCGCCTTT-3	5-AAAGGCGCTGAC/GTCAGCGCCTTT-3
motif1727	ZNF529|TCTTATTACCCM|M05806	ZNF529	0	0	1	5-TCTTATTACCCA/TGGGTAATAAGA-3	5-TCTTATTACCCM/KGGGTAATAAGA-3
motif1728	Zec|ATGAAWMCCGM|M05807	ZNF628	0	0	1	5-ATGAATACCGC/GCGGTATTCAT-3	5-ATGAAWMCCGM/KCGGKWTTCAT-3
motif1729	ZNF574|GWTTWACGACT|M05808	ZNF574	0	0	1	5-GATTTACGACT/AGTCGTAAATC-3	5-GWTTWACGACT/AGTCGTWAAWC-3
motif1730	ZNF529|KCRGTAACCCM|M05810	ZNF529	0	0	1	5-GCGGTAACCCC/GGGGTTACCGC-3	5-KCRGTAACCCM/KGGGTTACYGM-3
motif1731	Zfp184|TCAAATCAACA|M05811	ZNF184	0	0	1	5-TCAAATCAACA/TGTTGATTTGA-3	5-TCAAATCAACA/TGTTGATTTGA-3
motif1732	ZNF880|GGTAAGGCTKG|M05812	ZNF880	0	0	1	5-GGTAAGGCTTG/CAAGCCTTACC-3	5-GGTAAGGCTKG/CMAGCCTTACC-3
motif1733	ZNF690|TGTGAAAACGM|M05813	ZSCAN29	0	0	1	5-TGTGAAAACGA/TCGTTTTCACA-3	5-TGTGAAAACGM/KCGTTTTCACA-3
motif1734	ZNF605|BATCCATTCCCN|M05814	ZNF605	0	0	1	5-CATCCATTCCCA/TGGGAATGGATG-3	5-BATCCATTCCCN/NGGGAATGGATV-3
motif1735	ZNF613|GWCGTAGGMAKRCACGGR|M05815	ZNF613	0	0	1	5-GTCGTAGGAATGCACGGG/CCCGTGCATTCCTACGAC-3	5-GWCGTAGGMAKRCACGGR/YCCGTGYMTKCCTACGWC-3
motif1736	ZNF546|CCARTCACGACCAACCMC|M05817	ZNF546	0	0	1	5-CCAGTCACGACCAACCCC/GGGGTTGGTCGTGACTGG-3	5-CCARTCACGACCAACCMC/GKGGTTGGTCGTGAYTGG-3
motif1737	ZNF627|GAAWCGAGCACA|M05818	ZNF627	0	0	1	5-GAAACGAGCACA/TGTGCTCGTTTC-3	5-GAAWCGAGCACA/TGTGCTCGWTTC-3
motif1738	ZFP2|KATGACCACCC|M05820	ZFP2	0	0	1	5-GATGACCACCC/GGGTGGTCATC-3	5-KATGACCACCC/GGGTGGTCATM-3
motif1739	ZNF880|CRAGCCCTCC|M05821	ZNF880	0	0	1	5-CGAGCCCTCC/GGAGGGCTCG-3	5-CRAGCCCTCC/GGAGGGCTYG-3
motif1740	ZNF546|TYTCTGGACCCT|M05822	ZNF546	0	0	1	5-TTTCTGGACCCT/AGGGTCCAGAAA-3	5-TYTCTGGACCCT/AGGGTCCAGARA-3
motif1741	ZNF554|RAGGTAAATCGGTAGTGY|M05823	ZNF554	0	0	1	5-GAGGTAAATCGGTAGTGC/GCACTACCGATTTACCTC-3	5-RAGGTAAATCGGTAGTGY/RCACTACCGATTTACCTY-3
motif1742	ZBTB49|GATTTAGCCCG|M05824	ZBTB49	0	0	1	5-GATTTAGCCCG/CGGGCTAAATC-3	5-GATTTAGCCCG/CGGGCTAAATC-3
motif1743	ZNF572|GCTTCHCTACC|M05825	ZNF572	0	0	1	5-GCTTCCCTACC/GGTAGGGAAGC-3	5-GCTTCHCTACC/GGTAGDGAAGC-3
motif1744	ZNF66|TWAGTTGAASAC|M05826	ZNF66	0	0	1	5-TTAGTTGAAGAC/GTCTTCAACTAA-3	5-TWAGTTGAASAC/GTSTTCAACTWA-3
motif1745	Zfp775|GTGATAATKDACNY|M05828	ZNF775	0	0	1	5-GTGATAATGGACGC/GCGTCCATTATCAC-3	5-GTGATAATKDACNY/RNGTHMATTATCAC-3
motif1746	ZNF627|AAGGTCATAAGG|M05829	ZNF627	0	0	1	5-AAGGTCATAAGG/CCTTATGACCTT-3	5-AAGGTCATAAGG/CCTTATGACCTT-3
motif1747	ZNF66|CAGCGGCGCCKCCG|M05830	ZNF66	0	0	1	5-CAGCGGCGCCGCCG/CGGCGGCGCCGCTG-3	5-CAGCGGCGCCKCCG/CGGMGGCGCCGCTG-3
motif1748	ZNF880|CCKTTGCTGACCCCCTYC|M05831	ZNF880	0	0	1	5-CCGTTGCTGACCCCCTTC/GAAGGGGGTCAGCAACGG-3	5-CCKTTGCTGACCCCCTYC/GRAGGGGGTCAGCAAMGG-3
motif1749	ZNF620|KCGTTTWMAGC|M05832	ZNF620	0	0	1	5-GCGTTTTAAGC/GCTTAAAACGC-3	5-KCGTTTWMAGC/GCTKWAAACGM-3
motif1750	ZNF572|KCTACAGYCM|M05833	ZNF572	1	1	1	5-TCTACAGTCC/GGACTGTAGA-3	5-KCTACAGYCM/KGRCTGTAGM-3
motif1751	Zfp184|RGCTACCGC|M05834	ZNF184	0	0	1	5-AGCTACCGC/GCGGTAGCT-3	5-RGCTACCGC/GCGGTAGCY-3
motif1752	Zec|CNTAAAGCCGM|M05835	ZNF628	0	0	1	5-CTTAAAGCCGC/GCGGCTTTAAG-3	5-CNTAAAGCCGM/KCGGCTTTANG-3
motif1753	ZNF572|GGTTAAGRCGC|M05836	ZNF572	0	0	1	5-GGTTAAGGCGC/GCGCCTTAACC-3	5-GGTTAAGRCGC/GCGYCTTAACC-3
motif1754	ZNF550|GCTTACGGCMA|M05838	ZNF550	0	0	1	5-GCTTACGGCCA/TGGCCGTAAGC-3	5-GCTTACGGCMA/TKGCCGTAAGC-3
motif1755	Zbtb24|KCKCTTGCCCA|M05839	ZBTB24	0	0	1	5-TCTCTTGCCCA/TGGGCAAGAGA-3	5-KCKCTTGCCCA/TGGGCAAGMGM-3
motif1756	Zfp74|WRAATAAAAAACAGCCCG|M05841	ZNF74	0	0	1	5-AGAATAAAAAACAGCCCG/CGGGCTGTTTTTTATTCT-3	5-WRAATAAAAAACAGCCCG/CGGGCTGTTTTTTATTYW-3
motif1757	Zbtb41|RKAAGGGGK|M05842	ZBTB41	0	1	1	5-GGAAGGGGT/ACCCCTTCC-3	5-RKAAGGGGK/MCCCCTTMY-3
motif1758	Zfp184|TGTTTAGCWYC|M05843	ZNF184	0	0	1	5-TGTTTAGCTTC/GAAGCTAAACA-3	5-TGTTTAGCWYC/GRWGCTAAACA-3
motif1759	Zec|GTTAATAAACA|M05844	ZNF628	0	0	1	5-GTTAATAAACA/TGTTTATTAAC-3	5-GTTAATAAACA/TGTTTATTAAC-3
motif1760	ZNF690|HCCGTCCCCC|M05845	ZSCAN29	0	0	1	5-TCCGTCCCCC/GGGGGACGGA-3	5-HCCGTCCCCC/GGGGGACGGD-3
motif1761	ZNF689|RGGTWAAGTGC|M05846	ZNF689	0	0	1	5-GGGTTAAGTGC/GCACTTAACCC-3	5-RGGTWAAGTGC/GCACTTWACCY-3
motif1763	ZNF615|GDTAMAAGCGA|M05848	ZNF615	0	0	1	5-GGTACAAGCGA/TCGCTTGTACC-3	5-GDTAMAAGCGA/TCGCTTKTAHC-3
motif1764	ZNF248|GTTTCTAACGM|M05849	ZNF248	0	0	1	5-GTTTCTAACGA/TCGTTAGAAAC-3	5-GTTTCTAACGM/KCGTTAGAAAC-3
motif1765	Zfp768|TCTKCTTGACY|M05850	ZNF768	0	0	1	5-TCTTCTTGACC/GGTCAAGAAGA-3	5-TCTKCTTGACY/RGTCAAGMAGA-3
motif1766	Zfp768|TATTCBGRAWC|M05851	ZNF768	1	1	1	5-TATTCCGGAAC/GTTCCGGAATA-3	5-TATTCBGRAWC/GWTYCVGAATA-3
motif1767	ZNF689|GAAGGTTGCCC|M05852	ZNF689	0	0	1	5-GAAGGTTGCCC/GGGCAACCTTC-3	5-GAAGGTTGCCC/GGGCAACCTTC-3
motif1768	ZNF548|TNCGNTAAGAMCTCGGMA|M05853	ZNF548	0	0	1	5-TCCGATAAGAACTCGGAA/TTCCGAGTTCTTATCGGA-3	5-TNCGNTAAGAMCTCGGMA/TKCCGAGKTCTTANCGNA-3
motif1769	ZNF619|GGTAAAGCCGC|M05854	ZNF619	0	0	1	5-GGTAAAGCCGC/GCGGCTTTACC-3	5-GGTAAAGCCGC/GCGGCTTTACC-3
motif1770	ZNF312|GTTKCATTTCCCTTC|M05855	FEZF2	0	0	1	5-GTTTCATTTCCCTTC/GAAGGGAAATGAAAC-3	5-GTTKCATTTCCCTTC/GAAGGGAAATGMAAC-3
motif1771	ZNF565|TCTTACGCACCM|M05856	ZNF565	0	0	1	5-TCTTACGCACCA/TGGTGCGTAAGA-3	5-TCTTACGCACCM/KGGTGCGTAAGA-3
motif1773	ZNF548|GTTACTRCCGC|M05860	ZNF548	0	0	1	5-GTTACTACCGC/GCGGTAGTAAC-3	5-GTTACTRCCGC/GCGGYAGTAAC-3
motif1774	ZNF248|NTRHTAGGGACGAATCC|M05861	ZNF248	0	0	1	5-GTACTAGGGACGAATCC/GGATTCGTCCCTAGTAC-3	5-NTRHTAGGGACGAATCC/GGATTCGTCCCTADYAN-3
motif1775	ZNF615|AAGCTTGCKGTTGGTGGR|M05862	ZNF615	0	0	1	5-AAGCTTGCGGTTGGTGGA/TCCACCAACCGCAAGCTT-3	5-AAGCTTGCKGTTGGTGGR/YCCACCAACMGCAAGCTT-3
motif1776	ZNF491|GAACCTGGAAC|M05863	ZNF491	0	0	1	5-GAACCTGGAAC/GTTCCAGGTTC-3	5-GAACCTGGAAC/GTTCCAGGTTC-3
motif1777	ZNF615|GTCGTTGGCCGGTTCCCC|M05864	ZNF615	0	0	1	5-GTCGTTGGCCGGTTCCCC/GGGGAACCGGCCAACGAC-3	5-GTCGTTGGCCGGTTCCCC/GGGGAACCGGCCAACGAC-3
motif1778	ZNF709|GYTCCAACACC|M05865	ZNF709	0	0	1	5-GCTCCAACACC/GGTGTTGGAGC-3	5-GYTCCAACACC/GGTGTTGGARC-3
motif1779	ZNF491|WCTGTTGCCCC|M05866	ZNF491	0	1	1	5-TCTGTTGCCCC/GGGGCAACAGA-3	5-WCTGTTGCCCC/GGGGCAACAGW-3
motif1780	ZNF100|TCTACCGAC|M05867	ZNF100	0	0	1	5-TCTACCGAC/GTCGGTAGA-3	5-TCTACCGAC/GTCGGTAGA-3
motif1781	ZNF491|ACTGMCCMC|M05868	ZNF491	1	1	1	5-ACTGCCCAC/GTGGGCAGT-3	5-ACTGMCCMC/GKGGKCAGT-3
motif1782	ZNF454|GATTTMARCCA|M05869	ZNF454	0	0	1	5-GATTTCAACCA/TGGTTGAAATC-3	5-GATTTMARCCA/TGGYTKAAATC-3
motif1783	ZNF625|ARWTGKATMGA|M05870	ZNF625	0	0	1	5-AAATGGATCGA/TCGATCCATTT-3	5-ARWTGKATMGA/TCKATMCAWYT-3
motif1784	ZNF565|KGGTAGCCGGM|M05871	ZNF565	0	0	1	5-GGGTAGCCGGA/GCCGGCTACCC-3	5-KGGTAGCCGGM/KCCGGCTACCM-3
motif1785	VIK|BACMMMYCGGTCACC|M05872	ZNF655	0	0	1	5-CACCCCTCGGTCACC/GGTGACCGAGGGGTG-3	5-BACMMMYCGGTCACC/GGTGACCGRKKKGTV-3
motif1786	ZNF564|KGTTCACDWCC|M05874	ZNF564	0	0	1	5-GGTTCACTTCC/GGAAGTGAACC-3	5-KGTTCACDWCC/GGWHGTGAACM-3
motif1787	ZNF526|GYNCCMCAMCC|M05876	ZNF526	0	0	1	5-GTACCCCACCC/GGGTGGGGTAC-3	5-GYNCCMCAMCC/GGKTGKGGNRC-3
motif1788	EZI|CMYAACCCGTCCCCTGMC|M05877	ZNF467	0	0	1	5-CCCAACCCGTCCCCTGCC/GGCAGGGGACGGGTTGGG-3	5-CMYAACCCGTCCCCTGMC/GKCAGGGGACGGGTTRKG-3
motif1789	ZNF100|TGGWGGGCGGA|M05878	ZNF100	0	0	1	5-TGGAGGGCGGA/TCCGCCCTCCA-3	5-TGGWGGGCGGA/TCCGCCCWCCA-3
motif1791	ZNF676|TCACCCTACCC|M05880	ZNF676	0	0	1	5-TCACCCTACCC/GGGTAGGGTGA-3	5-TCACCCTACCC/GGGTAGGGTGA-3
motif1794	ZNF709|GDWCCARACCC|M05883	ZNF709	0	0	1	5-GGACCAAACCC/GGGTTTGGTCC-3	5-GDWCCARACCC/GGGTYTGGWHC-3
motif1796	ZNF709|TCTGCCCGCCW|M05885	ZNF709	0	0	1	5-TCTGCCCGCCA/TGGCGGGCAGA-3	5-TCTGCCCGCCW/WGGCGGGCAGA-3
motif1797	ZNF619|TCCKTTCGAMC|M05886	ZNF619	0	0	1	5-TCCGTTCGAAC/GTTCGAACGGA-3	5-TCCKTTCGAMC/GKTCGAAMGGA-3
motif1798	ZNF837|GGGWAGGCCGC|M05887	ZNF837	0	0	1	5-GGGAAGGCCGC/GCGGCCTTCCC-3	5-GGGWAGGCCGC/GCGGCCTWCCC-3
motif1799	ZNF676|DNDGCCTDCMC|M05889	ZNF676	0	0	1	5-GCAGCCTGCAC/GTGCAGGCTGC-3	5-DNDGCCTDCMC/GKGHAGGCHNH-3
motif1800	NRIF|TCGTWTGCMCA|M05890	ZNF274	0	0	1	5-TCGTATGCCCA/TGGGCATACGA-3	5-TCGTWTGCMCA/TGKGCAWACGA-3
motif1801	VIK|KATTCTGCCCC|M05891	ZNF655	0	0	1	5-TATTCTGCCCC/GGGGCAGAATA-3	5-KATTCTGCCCC/GGGGCAGAATM-3
motif1802	Zfp768|GGTACGGCGGM|M05892	ZNF768	0	0	1	5-GGTACGGCGGA/TCCGCCGTACC-3	5-GGTACGGCGGM/KCCGCCGTACC-3
motif1803	ZNF676|ACCGCCCCCTS|M05893	ZNF676	0	0	1	5-ACCGCCCCCTC/GAGGGGGCGGT-3	5-ACCGCCCCCTS/SAGGGGGCGGT-3
motif1804	ZNF454|GATTMTRTACC|M05895	ZNF454	0	0	1	5-GATTATGTACC/GGTACATAATC-3	5-GATTMTRTACC/GGTAYAKAATC-3
motif1805	ZNF713|SATTWTAACCC|M05896	ZNF713	0	0	1	5-GATTTTAACCC/GGGTTAAAATC-3	5-SATTWTAACCC/GGGTTAWAATS-3
motif1806	ZNF561|GAATATTAAMC|M05897	ZNF561	0	0	1	5-GAATATTAACC/GGTTAATATTC-3	5-GAATATTAAMC/GKTTAATATTC-3
motif1807	ZSCAN4|TTTGGATTAACA|M05898	ZSCAN4	0	0	1	5-TTTGGATTAACA/TGTTAATCCAAA-3	5-TTTGGATTAACA/TGTTAATCCAAA-3
motif1808	ZNF454|TTGAAAGCGTCTR|M05899	ZNF454	0	0	1	5-TTGAAAGCGTCTG/CAGACGCTTTCAA-3	5-TTGAAAGCGTCTR/YAGACGCTTTCAA-3
motif1809	znf439|TCGCTTGGCCC|M05900	ZNF439	0	0	1	5-TCGCTTGGCCC/GGGCCAAGCGA-3	5-TCGCTTGGCCC/GGGCCAAGCGA-3
motif1810	ZNF561|GATAGGGGSCGRTVGTCG|M05901	ZNF561	0	0	1	5-GATAGGGGCCGGTCGTCG/CGACGACCGGCCCCTATC-3	5-GATAGGGGSCGRTVGTCG/CGACBAYCGSCCCCTATC-3
motif1811	ZNF100|TCATCGGACCTC|M05902	ZNF100	0	0	1	5-TCATCGGACCTC/GAGGTCCGATGA-3	5-TCATCGGACCTC/GAGGTCCGATGA-3
motif1812	Zfp191|TCCTTTTGACC|M05903	ZNF24	0	0	1	5-TCCTTTTGACC/GGTCAAAAGGA-3	5-TCCTTTTGACC/GGTCAAAAGGA-3
motif1813	ZNF564|CGGMTGCCC|M05904	ZNF564	0	0	1	5-CGGCTGCCC/GGGCAGCCG-3	5-CGGMTGCCC/GGGCAKCCG-3
motif1814	ZNF649|GDTAAAWCGGA|M05905	ZNF649	0	0	1	5-GGTAAAACGGA/TCCGTTTTACC-3	5-GDTAAAWCGGA/TCCGWTTTAHC-3
motif1815	ZNF323|GGWTTGGSGGA|M05906	ZSCAN31	0	0	1	5-GGATTGGCGGA/TCCGCCAATCC-3	5-GGWTTGGSGGA/TCCSCCAAWCC-3
motif1816	FLJ20557|GMGAGACGTAGG|M05907	ZNF416	0	0	1	5-GAGAGACGTAGG/CCTACGTCTCTC-3	5-GMGAGACGTAGG/CCTACGTCTCKC-3
motif1817	Zfp319|NTAGTGGCATGGGKTCGGM|M05908	ZNF319	0	0	1	5-TTAGTGGCATGGGTTCGGA/TCCGAACCCATGCCACTAA-3	5-NTAGTGGCATGGGKTCGGM/KCCGAMCCCATGCCACTAN-3
motif1818	Zfp319|TWAAGGCTM|M05909	ZNF319	1	1	1	5-TAAAGGCTC/GAGCCTTTA-3	5-TWAAGGCTM/KAGCCTTWA-3
motif1819	ZNF335|AGGTGGSACGGTGGCCTC|M05910	ZNF335	0	0	1	5-AGGTGGCACGGTGGCCTC/GAGGCCACCGTGCCACCT-3	5-AGGTGGSACGGTGGCCTC/GAGGCCACCGTSCCACCT-3
motif1820	ZNF300|TCTTTAATCATG|M05911	ZNF300	0	0	1	5-TCTTTAATCATG/CATGATTAAAGA-3	5-TCTTTAATCATG/CATGATTAAAGA-3
motif1821	FLJ20557|TKTARCMCC|M05912	ZNF416	0	0	1	5-TTTAGCACC/GGTGCTAAA-3	5-TKTARCMCC/GGKGYTAMA-3
motif1822	ZIM3|CTTGGTGAKACM|M05913	ZIM3	0	0	1	5-CTTGGTGATACC/GGTATCACCAAG-3	5-CTTGGTGAKACM/KGTMTCACCAAG-3
motif1823	ZIM3|WTTTACTKTAAG|M05914	ZIM3	0	0	1	5-TTTTACTTTAAG/CTTAAAGTAAAA-3	5-WTTTACTKTAAG/CTTAMAGTAAAW-3
motif1824	ZBTB20|GGTWAAGCSGG|M05915	ZBTB20	0	0	1	5-GGTAAAGCGGG/CCCGCTTTACC-3	5-GGTWAAGCSGG/CCSGCTTWACC-3
motif1825	ZNF382|ATGGCTCGGACTTCGRCATC|M05918	ZNF382	0	0	1	5-ATGGCTCGGACTTCGACATC/GATGTCGAAGTCCGAGCCAT-3	5-ATGGCTCGGACTTCGRCATC/GATGYCGAAGTCCGAGCCAT-3
motif1827	ZNF556|TCKACCGSMTC|M05920	ZNF556	0	0	1	5-TCGACCGGATC/GATCCGGTCGA-3	5-TCKACCGSMTC/GAKSCGGTMGA-3
motif1828	Scrt1|TGCCGAAGCCGG|M05923	SCRT1	0	0	1	5-TGCCGAAGCCGG/CCGGCTTCGGCA-3	5-TGCCGAAGCCGG/CCGGCTTCGGCA-3
motif1829	Znf408|AAWCCCGGCCK|M05924	ZNF408	0	0	1	5-AAACCCGGCCT/AGGCCGGGTTT-3	5-AAWCCCGGCCK/MGGCCGGGWTT-3
motif1830	ZNF496|GMTTTGGGACT|M05925	ZNF496	0	0	1	5-GCTTTGGGACT/AGTCCCAAAGC-3	5-GMTTTGGGACT/AGTCCCAAAKC-3
motif1831	ZNF700|ACKACTAGTS|M05926	ZNF700	0	0	1	5-ACTACTAGTG/CACTAGTAGT-3	5-ACKACTAGTS/SACTAGTMGT-3
motif1832	Znf408|CTTTTTGGCAW|M05927	ZNF408	0	0	1	5-CTTTTTGGCAA/TTGCCAAAAAG-3	5-CTTTTTGGCAW/WTGCCAAAAAG-3
motif1833	ZNF300|TDGKTGGGTAGGTTTCKG|M05928	ZNF300	0	0	1	5-TAGGTGGGTAGGTTTCTG/CAGAAACCTACCCACCTA-3	5-TDGKTGGGTAGGTTTCKG/CMGAAACCTACCCAMCHA-3
motif1834	Zfp319|GGTTTWACC|M05929	ZNF319	0	0	1	5-GGTTTAACC/GGTTAAACC-3	5-GGTTTWACC/GGTWAAACC-3
motif1835	ZNF556|GATCGGTCCGC|M05931	ZNF556	0	0	1	5-GATCGGTCCGC/GCGGACCGATC-3	5-GATCGGTCCGC/GCGGACCGATC-3
motif1836	ZNF552|CACTTCTACACTGATCAC|M05933	ZNF552	0	0	1	5-CACTTCTACACTGATCAC/GTGATCAGTGTAGAAGTG-3	5-CACTTCTACACTGATCAC/GTGATCAGTGTAGAAGTG-3
motif1837	ZNF382|TCCRATHTTATTTCCYCY|M05935	ZNF382	0	0	1	5-TCCAATCTTATTTCCTCC/GGAGGAAATAAGATTGGA-3	5-TCCRATHTTATTTCCYCY/RGRGGAAATAADATYGGA-3
motif1838	Zfp672|WCCCCGGCAMC|M05936	ZNF672	0	0	1	5-TCCCCGGCAAC/GTTGCCGGGGA-3	5-WCCCCGGCAMC/GKTGCCGGGGW-3
motif1839	ZNF582|KCTTCATWCCM|M05937	ZNF582	0	0	1	5-TCTTCATACCA/TGGTATGAAGA-3	5-KCTTCATWCCM/KGGWATGAAGM-3
motif1840	znf471|CMTMWTWTACC|M05939	ZNF471	0	0	1	5-CATAATATACC/GGTATATTATG-3	5-CMTMWTWTACC/GGTAWAWKAKG-3
motif1841	ZNF335|BWGTCGATGGCSGAC|M05940	ZNF335	0	0	1	5-GTGTCGATGGCGGAC/GTCCGCCATCGACAC-3	5-BWGTCGATGGCSGAC/GTCSGCCATCGACWV-3
motif1842	znf471|GATTGAGATKGNGACGGG|M05941	ZNF471	0	0	1	5-GATTGAGATTGTGACGGG/CCCGTCACAATCTCAATC-3	5-GATTGAGATKGNGACGGG/CCCGTCNCMATCTCAATC-3
motif1844	ZNF700|RAGGCAACMCC|M05943	ZNF700	0	0	1	5-GAGGCAACCCC/GGGGTTGCCTC-3	5-RAGGCAACMCC/GGKGTTGCCTY-3
motif1845	ZNF552|WTTGCTGRMGA|M05944	ZNF552	0	0	1	5-TTTGCTGAAGA/TCTTCAGCAAA-3	5-WTTGCTGRMGA/TCKYCAGCAAW-3
motif1846	ZNF300|GRTTTCAATCAAGTTGGG|M05945	ZNF300	0	0	1	5-GGTTTCAATCAAGTTGGG/CCCAACTTGATTGAAACC-3	5-GRTTTCAATCAAGTTGGG/CCCAACTTGATTGAAAYC-3
motif1847	ZNF582|TGGAAGAACGC|M05948	ZNF582	0	0	1	5-TGGAAGAACGC/GCGTTCTTCCA-3	5-TGGAAGAACGC/GCGTTCTTCCA-3
motif1848	ZNF714|KCTTCCTTCCC|M05949	ZNF714	0	0	1	5-GCTTCCTTCCC/GGGAAGGAAGC-3	5-KCTTCCTTCCC/GGGAAGGAAGM-3
motif1849	ZNF700|SGAAYWACWCS|M05950	ZNF700	0	0	1	5-GGAACTACACC/GGTGTAGTTCC-3	5-SGAAYWACWCS/SGWGTWRTTCS-3
motif1850	Zfp672|GGAGGCCCGCCCCM|M05951	ZNF672	0	0	1	5-GGAGGCCCGCCCCC/GGGGGCGGGCCTCC-3	5-GGAGGCCCGCCCCM/KGGGGCGGGCCTCC-3
motif1851	Zfp672|TCGTTACGCCR|M05952	ZNF672	0	0	1	5-TCGTTACGCCA/TGGCGTAACGA-3	5-TCGTTACGCCR/YGGCGTAACGA-3
motif1852	ZNF553|GNTACGGCA|M05954	ZNF48	0	0	1	5-GATACGGCA/TGCCGTATC-3	5-GNTACGGCA/TGCCGTANC-3
motif1853	CTIP-2|TTGTACKAY|M05956	BCL11B	0	0	1	5-TTGTACGAC/GTCGTACAA-3	5-TTGTACKAY/RTMGTACAA-3
motif1854	ZNF286|KCATCCGCCAA|M05958	ZNF286A	0	0	1	5-GCATCCGCCAA/TTGGCGGATGC-3	5-KCATCCGCCAA/TTGGCGGATGM-3
motif1856	znf471|TCTCTTTTACC|M05960	ZNF471	0	0	1	5-TCTCTTTTACC/GGTAAAAGAGA-3	5-TCTCTTTTACC/GGTAAAAGAGA-3
motif1858	PRDM16|AKGCSGBCMC|M05962	PRDM16	0	0	1	5-ATGCCGGCAC/GTGCCGGCAT-3	5-AKGCSGBCMC/GKGVCSGCMT-3
motif1859	ZNF286|GKTGAGRABGM|M05963	ZNF286A	0	1	1	5-GTTGAGAACGC/GCGTTCTCAAC-3	5-GKTGAGRABGM/KCVTYCTCAMC-3
motif1860	ZNF175|TRTYAAWGAGA|M05965	ZNF175	0	0	1	5-TGTCAAAGAGA/TCTCTTTGACA-3	5-TRTYAAWGAGA/TCTCWTTRAYA-3
motif1861	ZFP14|TTTTATTCCYV|M05966	ZFP14	0	1	1	5-TTTTATTCCTC/GAGGAATAAAA-3	5-TTTTATTCCYV/BRGGAATAAAA-3
motif1862	ZFP30|TTTGGTAWACC|M05967	ZFP30	0	0	1	5-TTTGGTATACC/GGTATACCAAA-3	5-TTTGGTAWACC/GGTWTACCAAA-3
motif1863	ZFP30|TYTTTATTCCM|M05969	ZFP30	0	0	1	5-TTTTTATTCCC/GGGAATAAAAA-3	5-TYTTTATTCCM/KGGAATAAARA-3
motif1864	ZNF860|TCTTTCKKCCA|M05971	ZNF860	0	0	1	5-TCTTTCGGCCA/TGGCCGAAAGA-3	5-TCTTTCKKCCA/TGGMMGAAAGA-3
motif1865	ZNF701|TYTTCACCCCA|M05972	ZNF701	0	0	1	5-TCTTCACCCCA/TGGGGTGAAGA-3	5-TYTTCACCCCA/TGGGGTGAARA-3
motif1866	ZNF175|TCCTTTAACCA|M05973	ZNF175	0	0	1	5-TCCTTTAACCA/TGGTTAAAGGA-3	5-TCCTTTAACCA/TGGTTAAAGGA-3
motif1868	ZNF223|SGTAATTCGGA|M05976	ZNF223	0	0	1	5-CGTAATTCGGA/TCCGAATTACC-3	5-SGTAATTCGGA/TCCGAATTACS-3
motif1869	ZNF257|TGTGCGGMSGA|M05977	ZNF257	0	0	1	5-TGTGCGGCGGA/TCCGCCGCACA-3	5-TGTGCGGMSGA/TCSKCCGCACA-3
motif1870	ZNF230|AACTCCRAAGC|M05978	ZNF230	0	0	1	5-AACTCCAAAGC/GCTTTGGAGTT-3	5-AACTCCRAAGC/GCTTYGGAGTT-3
motif1871	ZNF223|YATCTAGAACC|M05979	ZNF223	0	0	1	5-TATCTAGAACC/GGTTCTAGATA-3	5-YATCTAGAACC/GGTTCTAGATR-3
motif1872	zfp64|ATACGGMTC|M05980	ZFP64	0	0	1	5-ATACGGATC/GATCCGTAT-3	5-ATACGGMTC/GAKCCGTAT-3
motif1873	ZNF233|KCGTTTCACCB|M05981	ZNF233	0	0	1	5-TCGTTTCACCG/CGGTGAAACGA-3	5-KCGTTTCACCB/VGGTGAAACGM-3
motif1874	ZFP14|TGTATATAAGC|M05982	ZFP14	0	0	1	5-TGTATATAAGC/GCTTATATACA-3	5-TGTATATAAGC/GCTTATATACA-3
motif1875	ZNF586|MCTKATCATGSG|M05984	ZNF586	0	0	1	5-CCTTATCATGCG/CGCATGATAAGG-3	5-MCTKATCATGSG/CSCATGATMAGK-3
motif1876	Zfp99|GCTAGAWCACCC|M05985	ZNF99	0	0	1	5-GCTAGATCACCC/GGGTGATCTAGC-3	5-GCTAGAWCACCC/GGGTGWTCTAGC-3
motif1877	Zfp99|CTTACCTTAACY|M05986	ZNF99	0	0	1	5-CTTACCTTAACC/GGTTAAGGTAAG-3	5-CTTACCTTAACY/RGTTAAGGTAAG-3
motif1878	ZNF180|TCTWAYCGACC|M05987	ZNF180	0	0	1	5-TCTTATCGACC/GGTCGATAAGA-3	5-TCTWAYCGACC/GGTCGRTWAGA-3
motif1879	ZNF860|KSCWTTTCCCM|M05988	ZNF860	0	0	1	5-GCCATTTCCCA/TGGGAAATGGC-3	5-KSCWTTTCCCM/KGGGAAAWGSM-3
motif1880	ZNF275|TMTRAWGKCCCM|M05989	ZNF275	0	0	1	5-TCTAAAGGCCCA/TGGGCCTTTAGA-3	5-TMTRAWGKCCCM/KGGGMCWTYAKA-3
motif1881	ZNF69|AMTCGGGATCA|M05990	ZNF69	0	0	1	5-AATCGGGATCA/TGATCCCGATT-3	5-AMTCGGGATCA/TGATCCCGAKT-3
motif1882	zfp64|BGRTTGTGGDCTMCCCCAMC|M05991	ZFP64	0	0	1	5-TGGTTGTGGACTCCCCCACC/GGTGGGGGAGTCCACAACCA-3	5-BGRTTGTGGDCTMCCCCAMC/GKTGGGGKAGHCCACAAYCV-3
motif1883	ZNF711|RTGCGTGCGC|M05993	ZNF711	0	0	1	5-ATGCGTGCGC/GCGCACGCAT-3	5-RTGCGTGCGC/GCGCACGCAY-3
motif1885	ZNF180|GCTKCCCCCCC|M05996	ZNF180	0	0	1	5-GCTGCCCCCCC/GGGGGGGCAGC-3	5-GCTKCCCCCCC/GGGGGGGMAGC-3
motif1886	zfp64|WGAAGCCGTTGGGRGGGG|M05997	ZFP64	0	0	1	5-AGAAGCCGTTGGGAGGGG/CCCCTCCCAACGGCTTCT-3	5-WGAAGCCGTTGGGRGGGG/CCCCYCCCAACGGCTTCW-3
motif1887	zfp64|TGGTGCCKTCTCCCACMN|M05998	ZFP64	0	0	1	5-TGGTGCCTTCTCCCACCG/CGGTGGGAGAAGGCACCA-3	5-TGGTGCCKTCTCCCACMN/NKGTGGGAGAMGGCACCA-3
motif1888	ZNF711|WGTTTAAACCC|M05999	ZNF711	0	0	1	5-TGTTTAAACCC/GGGTTTAAACA-3	5-WGTTTAAACCC/GGGTTTAAACW-3
motif1889	ZNF316|TTGAAAAGM|M06001	ZNF316	0	0	1	5-TTGAAAAGC/GCTTTTCAA-3	5-TTGAAAAGM/KCTTTTCAA-3
motif1890	ZNF175|GAAATACTAACCCAATCC|M06004	ZNF175	0	0	1	5-GAAATACTAACCCAATCC/GGATTGGGTTAGTATTTC-3	5-GAAATACTAACCCAATCC/GGATTGGGTTAGTATTTC-3
motif1891	ZSCAN11|TCTTTCCWMKR|M06005	ZNF232	0	0	1	5-TCTTTCCTCGA/TCGAGGAAAGA-3	5-TCTTTCCWMKR/YMKWGGAAAGA-3
motif1892	ZNF69|AGTCKTGMCCC|M06006	ZNF69	0	0	1	5-AGTCGTGCCCC/GGGGCACGACT-3	5-AGTCKTGMCCC/GGGKCAMGACT-3
motif1893	ZNF69|TCGCTAAGCCC|M06007	ZNF69	0	0	1	5-TCGCTAAGCCC/GGGCTTAGCGA-3	5-TCGCTAAGCCC/GGGCTTAGCGA-3
motif1894	ZBTB40|RAATASGAM|M06008	ZBTB40	0	0	1	5-AAATACGAA/TTCGTATTT-3	5-RAATASGAM/KTCSTATTY-3
motif1895	ZNF175|CATTCTTGAHC|M06009	ZNF175	0	0	1	5-CATTCTTGACC/GGTCAAGAATG-3	5-CATTCTTGAHC/GDTCAAGAATG-3
motif1896	ZNF701|TCTTHTGCCCA|M06010	ZNF701	0	0	1	5-TCTTTTGCCCA/TGGGCAAAAGA-3	5-TCTTHTGCCCA/TGGGCADAAGA-3
motif1897	ZNF275|TTACCAGTCCC|M06011	ZNF275	0	0	1	5-TTACCAGTCCC/GGGACTGGTAA-3	5-TTACCAGTCCC/GGGACTGGTAA-3
motif1898	ZNF586|ATGGCGTGMTG|M06012	ZNF586	0	0	1	5-ATGGCGTGATG/CATCACGCCAT-3	5-ATGGCGTGMTG/CAKCACGCCAT-3
motif1899	ZNF643|KCTAMCAAACC|M06013	ZFP69B	0	0	1	5-GCTACCAAACC/GGTTTGGTAGC-3	5-KCTAMCAAACC/GGTTTGKTAGM-3
motif1900	ZNF643|CATCTAGTMCC|M06014	ZFP69B	0	0	1	5-CATCTAGTCCC/GGGACTAGATG-3	5-CATCTAGTMCC/GGKACTAGATG-3
motif1902	ZNF729|TTCCACACC|M06016	ZNF729	0	0	1	5-TTCCACACC/GGTGTGGAA-3	5-TTCCACACC/GGTGTGGAA-3
motif1903	ZNF586|KCACCVKGCAGG|M06017	ZNF586	0	0	1	5-TCACCGTGCAGG/CCTGCACGGTGA-3	5-KCACCVKGCAGG/CCTGCMBGGTGM-3
motif1904	ZNF233|RWTAAAARACA|M06018	ZNF233	0	0	1	5-GATAAAAAACA/TGTTTTTTATC-3	5-RWTAAAARACA/TGTYTTTTAWY-3
motif1906	ZBTB40|GGAYYAGGACC|M06020	ZBTB40	0	0	1	5-GGACCAGGACC/GGTCCTGGTCC-3	5-GGAYYAGGACC/GGTCCTRRTCC-3
motif1907	ZNF98|TCTTCTWTCCA|M06021	ZNF98	0	0	1	5-TCTTCTTTCCA/TGGAAAGAAGA-3	5-TCTTCTWTCCA/TGGAWAGAAGA-3
motif1908	ZNF729|TCTTCTWKACA|M06022	ZNF729	0	0	1	5-TCTTCTTGACA/TGTCAAGAAGA-3	5-TCTTCTWKACA/TGTMWAGAAGA-3
motif1909	znf434|ACTCCAATACGG|M06023	ZSCAN32	0	0	1	5-ACTCCAATACGG/CCGTATTGGAGT-3	5-ACTCCAATACGG/CCGTATTGGAGT-3
motif1910	Zipro1|AGTCGTCMNG|M06024	ZSCAN21	0	0	1	5-AGTCGTCCGG/CCGGACGACT-3	5-AGTCGTCMNG/CNKGACGACT-3
motif1911	ZNF195|GWGKAAGCTGM|M06025	ZNF195	0	0	1	5-GTGTAAGCTGC/GCAGCTTACAC-3	5-GWGKAAGCTGM/KCAGCTTMCWC-3
motif1912	ZNF814|TTTCTGGGGAT|M06026	ZNF814	0	0	1	5-TTTCTGGGGAT/ATCCCCAGAAA-3	5-TTTCTGGGGAT/ATCCCCAGAAA-3
motif1913	ZNF891|HMACAAGGCAA|M06027	ZNF891	0	1	1	5-TCACAAGGCAA/TTGCCTTGTGA-3	5-HMACAAGGCAA/TTGCCTTGTKD-3
motif1914	ZNF749|WTKATGAGTGTTTGAGGNC|M06028	ZNF749	0	0	1	5-ATTATGAGTGTTTGAGGGC/GCCCTCAAACACTCATAAT-3	5-WTKATGAGTGTTTGAGGNC/GNCCTCAAACACTCATMAW-3
motif1915	ZNF197|TATGRTGGTAT|M06029	ZNF197	0	0	1	5-TATGGTGGTAT/ATACCACCATA-3	5-TATGRTGGTAT/ATACCAYCATA-3
motif1916	ZNF729|GDVGTAGTAGGGCCCCAT|M06030	ZNF729	0	0	1	5-GTCGTAGTAGGGCCCCAT/ATGGGGCCCTACTACGAC-3	5-GDVGTAGTAGGGCCCCAT/ATGGGGCCCTACTACBHC-3
motif1917	TCF17|KNTATMGGACC|M06031	ZNF354A	0	0	1	5-TGTATCGGACC/GGTCCGATACA-3	5-KNTATMGGACC/GGTCCKATANM-3
motif1918	ZNF727|TTAGTCGBCMC|M06032	ZNF727	0	0	1	5-TTAGTCGCCAC/GTGGCGACTAA-3	5-TTAGTCGBCMC/GKGVCGACTAA-3
motif1919	ZNF878|KGADTAAAACC|M06033	ZNF878	0	0	1	5-GGAGTAAAACC/GGTTTTACTCC-3	5-KGADTAAAACC/GGTTTTAHTCM-3
motif1920	ZNF729|TYTATACCMCC|M06034	ZNF729	0	0	1	5-TCTATACCCCC/GGGGGTATAGA-3	5-TYTATACCMCC/GGKGGTATARA-3
motif1921	ZNF749|CKTGCGGCCGC|M06035	ZNF749	0	0	1	5-CGTGCGGCCGC/GCGGCCGCACG-3	5-CKTGCGGCCGC/GCGGCCGCAMG-3
motif1922	ZNF197|KCTTATTGCCY|M06037	ZNF197	0	0	1	5-GCTTATTGCCT/AGGCAATAAGC-3	5-KCTTATTGCCY/RGGCAATAAGM-3
motif1923	ZNF878|CCACGTGGTSC|M06039	ZNF878	0	0	1	5-CCACGTGGTCC/GGACCACGTGG-3	5-CCACGTGGTSC/GSACCACGTGG-3
motif1924	ZNF276|ATGAGACGM|M06041	ZNF276	0	0	1	5-ATGAGACGC/GCGTCTCAT-3	5-ATGAGACGM/KCGTCTCAT-3
motif1925	ZNF208|GTTWYGAACGM|M06042	ZNF208	0	0	1	5-GTTTTGAACGA/TCGTTCAAAAC-3	5-GTTWYGAACGM/KCGTTCRWAAC-3
motif1926	ZNF208|KCATTACCCCC|M06044	ZNF208	0	0	1	5-TCATTACCCCC/GGGGGTAATGA-3	5-KCATTACCCCC/GGGGGTAATGM-3
motif1927	ZNF729|KCWCCAAYCTC|M06045	ZNF729	0	0	1	5-GCTCCAACCTC/GAGGTTGGAGC-3	5-KCWCCAAYCTC/GAGRTTGGWGM-3
motif1928	ZNF195|DCGGCTTCTCC|M06046	ZNF195	0	0	1	5-TCGGCTTCTCC/GGAGAAGCCGA-3	5-DCGGCTTCTCC/GGAGAAGCCGH-3
motif1929	ZNF276|GYTRGGGACGC|M06047	ZNF276	0	0	1	5-GCTAGGGACGC/GCGTCCCTAGC-3	5-GYTRGGGACGC/GCGTCCCYARC-3
motif1931	ZNF208|KGAACTCCC|M06049	ZNF208	0	0	1	5-GGAACTCCC/GGGAGTTCC-3	5-KGAACTCCC/GGGAGTTCM-3
motif1932	ZNF208|TCCACCCCCCC|M06051	ZNF208	0	0	1	5-TCCACCCCCCC/GGGGGGGTGGA-3	5-TCCACCCCCCC/GGGGGGGTGGA-3
motif1933	ZNF729|TCTTCACCACC|M06052	ZNF729	0	0	1	5-TCTTCACCACC/GGTGGTGAAGA-3	5-TCTTCACCACC/GGTGGTGAAGA-3
motif1934	ZNF99|TGKTCCTCAMC|M06054	ZNF99	0	0	1	5-TGGTCCTCACC/GGTGAGGACCA-3	5-TGKTCCTCAMC/GKTGAGGAMCA-3
motif1935	ZNF99|TGRTCTTCMCC|M06055	ZNF99	0	0	1	5-TGGTCTTCCCC/GGGGAAGACCA-3	5-TGRTCTTCMCC/GGKGAAGAYCA-3
[truncated: 936 more rows]
